# Supplementary material for: Knowledge-primed neural networks enable biologically interpretable deep learning on single-cell sequencing data
Source: Genome Biol. 2020 Aug 3;21:190. doi: 10.1186/s13059-020-02100-5 (PMC7397672; doi:10.1186/s13059-020-02100-5)
Supplement: Supplementary file 5 — Additional file 5: Table S3. Differential node weights comparing GEN KPNNs trained to distinguish immune cell types obtained from bone marrow vs cord blood, based on data from the Human Cell Atlas (HCA). [file 13059_2020_2100_MOESM5_ESM.xlsx]

## Sheet: Table S3
Node	Comparison	p-value	Adjusted p-value	Differential node weight
PPP3CC	Bone marrow versus cord blood	9.54655e-12	1.50645e-08	-0.000255021
MAF	Bone marrow versus cord blood	6.35455e-08	2.50687e-05	5.75305e-05
PPP3CB	Bone marrow versus cord blood	5.91772e-08	2.50687e-05	-0.000181714
KLF5	Bone marrow versus cord blood	1.75621e-07	5.25795e-05	8.95579e-05
STAT2	Bone marrow versus cord blood	1.99922e-07	5.25795e-05	0.000851369
PPP3CA	Bone marrow versus cord blood	3.75682e-07	8.46894e-05	-0.000123366
PP2B	Bone marrow versus cord blood	7.86882e-07	0.000137967	-0.00494106
MYOCD	Bone marrow versus cord blood	1.18596e-06	0.000176441	6.77311e-05
NLK	Bone marrow versus cord blood	1.26879e-06	0.000176441	-2.21681e-05
CEBPB	Bone marrow versus cord blood	6.39887e-06	0.000560967	0.00581676
RELA	Bone marrow versus cord blood	5.65127e-06	0.000560967	0.0092086
DLL4	Bone marrow versus cord blood	7.32309e-06	0.000608202	-0.010289
MYC	Bone marrow versus cord blood	8.91979e-06	0.000670258	0.00557604
NUAK1	Bone marrow versus cord blood	8.54885e-06	0.000670258	3.91804e-05
SPAG9	Bone marrow versus cord blood	1.20455e-05	0.000826427	-0.0005715
FOS	Bone marrow versus cord blood	1.62615e-05	0.00106919	0.000494629
DLL3	Bone marrow versus cord blood	2.28231e-05	0.00133388	-0.00677752
MAP2K4	Bone marrow versus cord blood	2.22554e-05	0.00133388	7.58915e-05
DAB1	Bone marrow versus cord blood	2.50773e-05	0.00141329	0.00013422
DDB2	Bone marrow versus cord blood	5.9165e-05	0.00291758	-0.000123212
KLF4	Bone marrow versus cord blood	5.88161e-05	0.00291758	0.00337198
MAP3K7	Bone marrow versus cord blood	0.000108495	0.00428014	-0.000580195
STAT4	Bone marrow versus cord blood	0.000114006	0.00438784	-0.00200647
SETDB1.NLK.CHD7	Bone marrow versus cord blood	0.00018483	0.00620558	-7.14821e-08
FRS2	Bone marrow versus cord blood	0.000262332	0.00844815	-0.00285698
KAT5	Bone marrow versus cord blood	0.000300894	0.00949622	-6.71361e-05
MAP2K3	Bone marrow versus cord blood	0.000329684	0.00963411	-3.1516e-05
MAPK10	Bone marrow versus cord blood	0.000400069	0.0112734	-0.0013544
SOX2	Bone marrow versus cord blood	0.000444323	0.0121253	0.00349688
YWHAZ	Bone marrow versus cord blood	0.00044567	0.0121253	0.000112601
MAPK11	Bone marrow versus cord blood	0.000500269	0.012761	-6.48947e-05
RUNX3	Bone marrow versus cord blood	0.000528739	0.0132437	3.49757e-07
SUFU	Bone marrow versus cord blood	0.000626617	0.0147582	-0.000294374
HSF1	Bone marrow versus cord blood	0.000692353	0.0156076	0.00011925
LEF1	Bone marrow versus cord blood	0.00081835	0.0179355	0.000123552
KRAS	Bone marrow versus cord blood	0.000982642	0.0204772	0.00101283
SNAI1	Bone marrow versus cord blood	0.000986226	0.0204772	4.54656e-05
GSK3B	Bone marrow versus cord blood	0.00101216	0.0207427	0.00296051
FYN	Bone marrow versus cord blood	0.0012507	0.0238987	-0.00271186
RPS6KA5	Bone marrow versus cord blood	0.00141511	0.0259656	0.000725284
INSR	Bone marrow versus cord blood	0.00173509	0.0298137	-0.00714928
JUN	Bone marrow versus cord blood	0.00229143	0.037277	-0.00420776
CALM1	Bone marrow versus cord blood	0.00232024	0.0373598	-0.000428904
FOXM1	Bone marrow versus cord blood	0.00237541	0.0373598	-0.000164627
HNF4A	Bone marrow versus cord blood	0.00251099	0.0388465	0.00192741
CyclinD.CDK4	Bone marrow versus cord blood	0.00273168	0.0410532	3.8726e-05
PRKDC	Bone marrow versus cord blood	0.00276225	0.041121	-3.15793e-06
RUNX2	Bone marrow versus cord blood	0.00315581	0.0444631	-0.000265233
POU5F1	Bone marrow versus cord blood	0.00332159	0.0457247	0.0020698
HSP90AA1	Bone marrow versus cord blood	0.00371346	0.0488319	-3.95597e-06
THRB	Bone marrow versus cord blood	0.00380622	0.0496382	3.3578e-05
DYRK1B	Bone marrow versus cord blood	0.00397721	0.0510247	-8.25412e-06
NFE2L2	Bone marrow versus cord blood	0.0041546	0.0514427	4.74483e-05
RASA1	Bone marrow versus cord blood	0.00424761	0.0515595	-0.000350958
DVL2	Bone marrow versus cord blood	0.00476675	0.0545067	4.29662e-06
GLI2	Bone marrow versus cord blood	0.00501284	0.0569084	4.9056e-05
PTPN6	Bone marrow versus cord blood	0.00509	0.0569647	-0.00128834
STAT5A	Bone marrow versus cord blood	0.00552433	0.0605374	0.00492313
NR2F2	Bone marrow versus cord blood	0.00566461	0.0612244	8.00301e-14
KDM1A	Bone marrow versus cord blood	0.00622794	0.065518	1.53875e-10
MAZ	Bone marrow versus cord blood	0.00686945	0.0703895	4.84748e-05
SYK	Bone marrow versus cord blood	0.00749853	0.0738939	-4.34126e-05
UBTF	Bone marrow versus cord blood	0.00743503	0.0738939	2.8777e-05
RBPJ	Bone marrow versus cord blood	0.00813465	0.0787514	-0.000363428
MAFA	Bone marrow versus cord blood	0.00853495	0.0801676	-0.000409007
CDON	Bone marrow versus cord blood	0.00887592	0.0819076	-0.0102738
MAPKAPK2	Bone marrow versus cord blood	0.00951431	0.084346	-0.000228406
PRKCI	Bone marrow versus cord blood	0.0094748	0.084346	4.86037e-05
PSENEN	Bone marrow versus cord blood	0.00944441	0.084346	-0.000300148
TP53RK	Bone marrow versus cord blood	0.00948911	0.084346	3.49918e-05
KIF7	Bone marrow versus cord blood	0.0104512	0.089146	-0.000289076
CAMKK1	Bone marrow versus cord blood	0.0108504	0.0910743	-6.16564e-06
SMAD3	Bone marrow versus cord blood	0.0114432	0.0936941	0.00364039
AKT3	Bone marrow versus cord blood	0.0128859	0.0999553	7.82959e-05
SFN	Bone marrow versus cord blood	0.0128439	0.0999553	7.58982e-05
EZH2	Bone marrow versus cord blood	0.0137201	0.103051	0.00559472
ESR1	Bone marrow versus cord blood	0.0140639	0.104192	0.0067714
CREB1	Bone marrow versus cord blood	0.0149693	0.108855	0.00307646
CDX2	Bone marrow versus cord blood	0.0155433	0.111997	6.18351e-05
NUMB	Bone marrow versus cord blood	0.0156351	0.112139	1.02141e-06
POLR2A	Bone marrow versus cord blood	0.0157677	0.112139	3.43506e-05
NOTCH3	Bone marrow versus cord blood	0.0160932	0.112867	-0.000434318
PLK1	Bone marrow versus cord blood	0.0160093	0.112867	0.000365872
MYD88	Bone marrow versus cord blood	0.0164386	0.114274	-0.000321046
CHD7	Bone marrow versus cord blood	0.0166106	0.114461	-3.3645e-12
CSNK1D	Bone marrow versus cord blood	0.0165633	0.114461	8.18304e-05
ASH2L	Bone marrow versus cord blood	0.017092	0.116255	-1.52342e-17
SRC	Bone marrow versus cord blood	0.0176005	0.116695	0.00537892
RANBP9	Bone marrow versus cord blood	0.0179152	0.117792	-0.000127622
CDK3	Bone marrow versus cord blood	0.0193307	0.122938	9.11358e-07
GSK3A	Bone marrow versus cord blood	0.0198414	0.123664	0.000148621
NR2F1	Bone marrow versus cord blood	0.0199837	0.123664	9.32037e-14
RET	Bone marrow versus cord blood	0.0199511	0.123664	0.00990285
TAL1	Bone marrow versus cord blood	0.0198129	0.123664	0.000487017
TP63	Bone marrow versus cord blood	0.019624	0.123664	-0.000446896
MAFF	Bone marrow versus cord blood	0.0209036	0.127003	-1.06223e-08
SIRT2	Bone marrow versus cord blood	0.0214626	0.127803	-4.61495e-05
NCOA1	Bone marrow versus cord blood	0.0226197	0.13027	2.91584e-05
RFX5	Bone marrow versus cord blood	0.0225537	0.13027	-8.17357e-05
TRIM28	Bone marrow versus cord blood	0.0225512	0.13027	0.00109318
TBP	Bone marrow versus cord blood	0.0235866	0.134367	-6.20492e-11
AGTR1	Bone marrow versus cord blood	0.0240127	0.134847	0.00215225
CDC25A	Bone marrow versus cord blood	0.0251935	0.135774	-5.9013e-05
RXRA	Bone marrow versus cord blood	0.0251189	0.135774	7.62868e-05
TRAF3	Bone marrow versus cord blood	0.0253196	0.135774	-0.00023555
MTOR	Bone marrow versus cord blood	0.0269925	0.137315	-0.000284868
SDC4	Bone marrow versus cord blood	0.0270683	0.137315	-1.6308e-07
SET	Bone marrow versus cord blood	0.0284081	0.139651	-7.08357e-06
MLL.SET.subcomplex	Bone marrow versus cord blood	0.0289064	0.14056	-3.37261e-12
SH3RF1	Bone marrow versus cord blood	0.0288649	0.14056	1.803e-05
JAK1	Bone marrow versus cord blood	0.0291467	0.141084	-0.00360181
TCF3	Bone marrow versus cord blood	0.030362	0.145309	0.00529618
FADD	Bone marrow versus cord blood	0.0310666	0.147217	-9.4299e-05
mTORC1	Bone marrow versus cord blood	0.0315147	0.148448	-0.000426676
ABL1	Bone marrow versus cord blood	0.031773	0.14922	-0.00249578
ARNT	Bone marrow versus cord blood	0.0325528	0.151083	-8.1505e-06
RIPK1	Bone marrow versus cord blood	0.0326624	0.151148	-0.000243595
MEK1.2	Bone marrow versus cord blood	0.0356539	0.157937	-4.04652e-05
SUZ12	Bone marrow versus cord blood	0.0362484	0.159331	0.000136817
GTF2I	Bone marrow versus cord blood	0.0365008	0.159682	0.000145467
IKK.complex	Bone marrow versus cord blood	0.0375541	0.160597	5.47443e-05
PDX1	Bone marrow versus cord blood	0.0375207	0.160597	-4.05931e-09
PTK2	Bone marrow versus cord blood	0.0379255	0.161747	-0.000321889
CRX	Bone marrow versus cord blood	0.0392698	0.164413	-1.72561e-05
PRKCE	Bone marrow versus cord blood	0.0394151	0.164542	2.94412e-05
TNFRSF13C	Bone marrow versus cord blood	0.0395528	0.164682	-0.0020645
AR	Bone marrow versus cord blood	0.0398924	0.165658	-0.0012735
DDB1	Bone marrow versus cord blood	0.0409409	0.16665	-1.27987e-17
GABARAP	Bone marrow versus cord blood	0.0408097	0.16665	-0.00203388
MEF2A	Bone marrow versus cord blood	0.0407809	0.16665	-7.57758e-05
ZBTB16	Bone marrow versus cord blood	0.0409759	0.16665	1.85175e-06
GLI1	Bone marrow versus cord blood	0.0418724	0.169422	-1.50638e-05
RBBP5	Bone marrow versus cord blood	0.0422476	0.169635	-1.27166e-17
RFX.complex	Bone marrow versus cord blood	0.0422374	0.169635	-4.79917e-07
CSNK1A1	Bone marrow versus cord blood	0.0427598	0.169967	-1.26859e-17
DUSP6	Bone marrow versus cord blood	0.0425936	0.169967	-2.19931e-05
PTPN11	Bone marrow versus cord blood	0.0425076	0.169967	-0.00080499
SGK2	Bone marrow versus cord blood	0.0428688	0.169967	6.41142e-06
STAT1	Bone marrow versus cord blood	0.042806	0.169967	0.00641076
GATA3	Bone marrow versus cord blood	0.0429989	0.170001	-1.26718e-17
NR4A1	Bone marrow versus cord blood	0.0439341	0.172458	4.84252e-05
BTRC	Bone marrow versus cord blood	0.044248	0.17283	-1.25961e-17
HTT	Bone marrow versus cord blood	0.0458307	0.177286	2.7632e-05
SOX9	Bone marrow versus cord blood	0.0462888	0.178155	-5.49669e-06
ERBB2	Bone marrow versus cord blood	0.0465855	0.178861	-0.00708838
HSP90AB1	Bone marrow versus cord blood	0.0470556	0.179357	7.76121e-05
RXRB	Bone marrow versus cord blood	0.047353	0.179813	2.47875e-09
ULK1.Atg13.Fip200	Bone marrow versus cord blood	0.0476526	0.180248	-1.29588e-05
TGFBR2	Bone marrow versus cord blood	0.0483961	0.180266	-0.00183686
BCL3	Bone marrow versus cord blood	0.0485792	0.180372	4.18877e-08
NCOR1	Bone marrow versus cord blood	0.0500231	0.182852	2.67981e-05
PPM1A	Bone marrow versus cord blood	0.050001	0.182852	-2.17798e-05
APEX1	Bone marrow versus cord blood	0.0512183	0.18615	5.08436e-06
ATF2	Bone marrow versus cord blood	0.0527113	0.18615	7.99394e-05
BTK	Bone marrow versus cord blood	0.054202	0.18615	-5.63777e-05
IKBKG	Bone marrow versus cord blood	0.0531045	0.18615	-0.000179928
NPM1	Bone marrow versus cord blood	0.0526086	0.18615	-4.47297e-05
SP1	Bone marrow versus cord blood	0.0538023	0.18615	-0.00114983
MAPK12	Bone marrow versus cord blood	0.0554989	0.187934	-2.23985e-06
MAPK15	Bone marrow versus cord blood	0.0570972	0.190889	-0.000116292
LATS1	Bone marrow versus cord blood	0.058226	0.193841	-3.06797e-05
CEBPD	Bone marrow versus cord blood	0.0588477	0.194467	-1.42072e-06
CHEK1	Bone marrow versus cord blood	0.0595174	0.194467	-3.14696e-05
NCK1	Bone marrow versus cord blood	0.0594342	0.194467	-0.000228338
PRKCD	Bone marrow versus cord blood	0.0596465	0.194467	0.00159997
TP53	Bone marrow versus cord blood	0.0596381	0.194467	7.9361e-05
CDKN1A	Bone marrow versus cord blood	0.061132	0.197043	6.51394e-05
SETDB1	Bone marrow versus cord blood	0.0617172	0.19835	-3.87957e-11
MYOD1.SWI.SNF.complex	Bone marrow versus cord blood	0.0619451	0.198677	-4.62099e-05
GATA1	Bone marrow versus cord blood	0.0632585	0.200904	0.000738223
NCOA3	Bone marrow versus cord blood	0.0636783	0.200904	-0.00255915
PDPK1	Bone marrow versus cord blood	0.064342	0.200904	0.000849776
TEAD4	Bone marrow versus cord blood	0.0638711	0.200904	0.00081848
NKX3.1	Bone marrow versus cord blood	0.0648826	0.201545	-2.74277e-07
p38	Bone marrow versus cord blood	0.0661609	0.203987	0.000130456
CYLD	Bone marrow versus cord blood	0.0701199	0.212378	4.87526e-06
GSK3B.Axin.APC	Bone marrow versus cord blood	0.0715993	0.215207	0.00251816
CTNNB1	Bone marrow versus cord blood	0.0720633	0.21578	0.00476611
SF1	Bone marrow versus cord blood	0.07634	0.224329	-1.01958e-10
FHL2	Bone marrow versus cord blood	0.0780136	0.227551	-5.90186e-08
MET	Bone marrow versus cord blood	0.0781575	0.227551	-0.00147258
YY1	Bone marrow versus cord blood	0.0780344	0.227551	0.000209495
ATR	Bone marrow versus cord blood	0.0797583	0.230087	-0.000314492
MAP2K1	Bone marrow versus cord blood	0.0800494	0.230087	-3.85791e-05
RARB	Bone marrow versus cord blood	0.0809172	0.231318	7.65573e-07
AXIN1	Bone marrow versus cord blood	0.08125	0.231849	0.000182088
MAP3K10	Bone marrow versus cord blood	0.0818832	0.231978	-7.42059e-07
APP	Bone marrow versus cord blood	0.0849011	0.236645	-0.00189978
PBX1	Bone marrow versus cord blood	0.0849567	0.236645	5.97802e-07
SMARCA4	Bone marrow versus cord blood	0.0845008	0.236645	-4.02191e-05
RANBP3	Bone marrow versus cord blood	0.0890024	0.24357	1.53703e-05
BMPR1A	Bone marrow versus cord blood	0.0930865	0.250351	7.44653e-06
CyclinE.CDK2	Bone marrow versus cord blood	0.0931281	0.250351	1.25369e-05
STAT3	Bone marrow versus cord blood	0.0930795	0.250351	0.00684052
SMAD4	Bone marrow versus cord blood	0.0950278	0.253729	-8.86659e-05
GATA2	Bone marrow versus cord blood	0.101531	0.262852	0.00066324
HMT	Bone marrow versus cord blood	0.101609	0.262852	-6.33334e-13
PRRX1	Bone marrow versus cord blood	0.102126	0.263756	-4.49454e-06
CCND1	Bone marrow versus cord blood	0.104607	0.266941	-6.14222e-05
FOXA2	Bone marrow versus cord blood	0.104713	0.266941	3.04328e-07
TRAF2	Bone marrow versus cord blood	0.105144	0.267246	0.000410123
CLOCK	Bone marrow versus cord blood	0.107658	0.268619	-3.46437e-06
DCX.DET1.COP1	Bone marrow versus cord blood	0.108261	0.268619	-4.70991e-13
HES1	Bone marrow versus cord blood	0.107958	0.268619	-2.67394e-07
MLL1.complex	Bone marrow versus cord blood	0.107299	0.268619	-5.81553e-08
SCF.SKP2	Bone marrow versus cord blood	0.107294	0.268619	-1.2721e-11
SMAD2	Bone marrow versus cord blood	0.109948	0.271091	0.0019384
SGK1	Bone marrow versus cord blood	0.112617	0.275519	-1.28706e-05
CDK6	Bone marrow versus cord blood	0.113688	0.276425	7.05752e-07
NFKBIA	Bone marrow versus cord blood	0.114379	0.277678	0.000899193
RPS6KA4	Bone marrow versus cord blood	0.115637	0.278953	0.000306933
MAPK13	Bone marrow versus cord blood	0.122129	0.289565	-7.40128e-08
PAX7	Bone marrow versus cord blood	0.122202	0.289565	-6.54723e-06
DDX5	Bone marrow versus cord blood	0.123534	0.291386	-3.10596e-05
SRY	Bone marrow versus cord blood	0.124682	0.293217	-7.75749e-09
IL1R1	Bone marrow versus cord blood	0.125138	0.293831	-0.00675484
HDAC5	Bone marrow versus cord blood	0.126638	0.296492	2.41155e-06
IRAK1	Bone marrow versus cord blood	0.128498	0.297076	-9.57866e-05
TNFRSF1B	Bone marrow versus cord blood	0.128134	0.297076	-0.0016336
BAD	Bone marrow versus cord blood	0.132833	0.302468	2.59391e-05
EP300	Bone marrow versus cord blood	0.135374	0.306586	-0.00105698
MAPK14	Bone marrow versus cord blood	0.135419	0.306586	-0.00315013
IKBKE	Bone marrow versus cord blood	0.137422	0.308533	5.69477e-06
MAPK9	Bone marrow versus cord blood	0.138038	0.308533	0.00182536
PRKG1	Bone marrow versus cord blood	0.137619	0.308533	-4.22674e-07
LYN	Bone marrow versus cord blood	0.13959	0.311121	0.000480518
PSEN1	Bone marrow versus cord blood	0.140455	0.312166	0.00467253
CRL4.CRBN.	Bone marrow versus cord blood	0.141287	0.313575	4.61813e-13
MYOG	Bone marrow versus cord blood	0.142406	0.315613	1.45793e-07
MAFK	Bone marrow versus cord blood	0.142972	0.315979	-6.92345e-09
MXI1	Bone marrow versus cord blood	0.145127	0.319773	9.29203e-07
Myog.SWI.SNF.complex	Bone marrow versus cord blood	0.14528	0.319773	1.8266e-07
CEBPA	Bone marrow versus cord blood	0.146813	0.321765	3.64353e-05
RYK	Bone marrow versus cord blood	0.146729	0.321765	-1.36676e-05
SMAD3.SMAD4	Bone marrow versus cord blood	0.148412	0.323813	-6.06996e-05
g.secretase	Bone marrow versus cord blood	0.149341	0.325049	-0.00388353
P300.PCAF	Bone marrow versus cord blood	0.15041	0.326025	1.37833e-05
SKIL	Bone marrow versus cord blood	0.150226	0.326025	-9.52452e-08
NOTCH1	Bone marrow versus cord blood	0.152162	0.3289	-0.00464596
X14.3.3	Bone marrow versus cord blood	0.153568	0.330151	6.01782e-07
STK3	Bone marrow versus cord blood	0.158982	0.338104	-3.34258e-05
PML	Bone marrow versus cord blood	0.160021	0.338235	-2.72301e-05
HSF2	Bone marrow versus cord blood	0.162622	0.340794	-2.56506e-13
TCF12	Bone marrow versus cord blood	0.164413	0.342973	4.08425e-07
CRTC3	Bone marrow versus cord blood	0.16884	0.349186	-2.18857e-10
ATF1	Bone marrow versus cord blood	0.169286	0.349391	1.02805e-05
HNF1A	Bone marrow versus cord blood	0.169887	0.349977	3.06839e-08
MAPK1	Bone marrow versus cord blood	0.170654	0.350641	-0.00114794
PAK2	Bone marrow versus cord blood	0.171498	0.351459	0.000116641
NR2F6	Bone marrow versus cord blood	0.179013	0.362597	1.90042e-05
NFATC2	Bone marrow versus cord blood	0.180329	0.363288	4.37007e-05
AMPK	Bone marrow versus cord blood	0.18105	0.363335	-2.86464e-07
IL4R	Bone marrow versus cord blood	0.181207	0.363335	-0.00313443
INCENP	Bone marrow versus cord blood	0.181182	0.363335	-2.71349e-05
WWTR1	Bone marrow versus cord blood	0.183065	0.366105	0.00100675
SREBF2	Bone marrow versus cord blood	0.185147	0.36674	1.55813e-05
PAX3	Bone marrow versus cord blood	0.187001	0.36932	2.43864e-05
HIF1A	Bone marrow versus cord blood	0.19184	0.37746	-0.000181093
SCF.betaTRCP	Bone marrow versus cord blood	0.192852	0.378979	-6.55612e-14
CDK2	Bone marrow versus cord blood	0.194405	0.381557	5.79732e-05
MDM2	Bone marrow versus cord blood	0.19632	0.384358	-3.86318e-05
KHSRP	Bone marrow versus cord blood	0.197527	0.385643	-3.11536e-05
IL10RA	Bone marrow versus cord blood	0.199091	0.386427	-0.00278737
LRP6	Bone marrow versus cord blood	0.199549	0.386539	0.00277044
TFAP2A	Bone marrow versus cord blood	0.201693	0.389561	-8.25046e-06
CDK4	Bone marrow versus cord blood	0.203329	0.391762	5.63546e-07
MAPK8IP1	Bone marrow versus cord blood	0.203737	0.39207	3.78133e-05
NR3C1	Bone marrow versus cord blood	0.206381	0.395711	0.000883361
TBK1	Bone marrow versus cord blood	0.209239	0.398333	0.000392416
SCF.FBW7	Bone marrow versus cord blood	0.210394	0.400002	-1.28619e-12
CAMKK2	Bone marrow versus cord blood	0.212412	0.402868	1.89168e-05
CHUK	Bone marrow versus cord blood	0.213568	0.403123	3.62619e-05
CAMK1	Bone marrow versus cord blood	0.215006	0.405352	1.58814e-07
FOXP3	Bone marrow versus cord blood	0.216694	0.406592	2.74998e-05
CSNK2B	Bone marrow versus cord blood	0.217337	0.40683	-9.89164e-05
GTF2A2	Bone marrow versus cord blood	0.220446	0.411187	-6.15079e-06
IFNGR2.INFGR1	Bone marrow versus cord blood	0.220121	0.411187	-0.00311644
MAP3K1	Bone marrow versus cord blood	0.22038	0.411187	9.86069e-05
ESR2	Bone marrow versus cord blood	0.22416	0.415837	-0.000182321
GATA6	Bone marrow versus cord blood	0.226063	0.416738	5.41452e-07
LTBR	Bone marrow versus cord blood	0.226002	0.416738	-0.00126467
PPP1CC	Bone marrow versus cord blood	0.226719	0.416972	-5.68199e-08
ROCK1	Bone marrow versus cord blood	0.227833	0.418047	-3.11725e-07
BRCA1	Bone marrow versus cord blood	0.229178	0.419539	-2.626e-05
GNA13	Bone marrow versus cord blood	0.230828	0.42207	4.79795e-05
MLL2.complex	Bone marrow versus cord blood	0.231433	0.422686	-1.18272e-08
STAT5B	Bone marrow versus cord blood	0.235026	0.427271	-0.000147071
CUX1	Bone marrow versus cord blood	0.237696	0.428566	0.000281936
RHOA	Bone marrow versus cord blood	0.2366	0.428566	-3.48772e-06
TJP2	Bone marrow versus cord blood	0.236654	0.428566	0.00270958
PIN1	Bone marrow versus cord blood	0.238395	0.428948	8.62178e-05
NR4A2	Bone marrow versus cord blood	0.239276	0.430043	-1.31914e-05
FGFR1	Bone marrow versus cord blood	0.245277	0.436847	-0.000873024
PTPRR	Bone marrow versus cord blood	0.245157	0.436847	2.77894e-06
CBX3	Bone marrow versus cord blood	0.247813	0.439517	2.39445e-06
CREBBP	Bone marrow versus cord blood	0.249374	0.44084	4.8261e-05
RCOR1	Bone marrow versus cord blood	0.254296	0.447856	-5.27482e-10
ID2	Bone marrow versus cord blood	0.255144	0.448339	4.63743e-07
JAK2	Bone marrow versus cord blood	0.258918	0.452462	-0.0035661
JDP2	Bone marrow versus cord blood	0.259396	0.452795	2.3805e-05
RFXANK	Bone marrow versus cord blood	0.260001	0.452849	-6.59008e-10
IRF7	Bone marrow versus cord blood	0.261625	0.455176	-5.01737e-07
PKN1	Bone marrow versus cord blood	0.262247	0.455755	-4.33316e-06
KMT2D	Bone marrow versus cord blood	0.263731	0.457327	-3.54561e-08
E2F1	Bone marrow versus cord blood	0.270386	0.465796	-0.000428808
ATM	Bone marrow versus cord blood	0.272484	0.466862	6.94933e-06
GNAQ	Bone marrow versus cord blood	0.277723	0.474807	4.94705e-05
PPP2CA	Bone marrow versus cord blood	0.281804	0.479188	0.00031061
MAFG	Bone marrow versus cord blood	0.283592	0.481192	-4.13813e-09
PPP1R15A	Bone marrow versus cord blood	0.283372	0.481192	-9.90975e-06
ZNF217	Bone marrow versus cord blood	0.286599	0.484731	-2.30834e-10
SP3	Bone marrow versus cord blood	0.287703	0.486077	-1.0812e-05
MEIS1	Bone marrow versus cord blood	0.289831	0.488625	-2.17136e-09
TCF7	Bone marrow versus cord blood	0.291242	0.489957	4.67667e-05
SKI	Bone marrow versus cord blood	0.291817	0.490401	1.02326e-05
DNMT1	Bone marrow versus cord blood	0.292964	0.490482	-2.44356e-05
HMGA1	Bone marrow versus cord blood	0.292649	0.490482	-2.13227e-05
RORA	Bone marrow versus cord blood	0.303371	0.503385	7.1015e-06
IKZF1	Bone marrow versus cord blood	0.308653	0.510004	-5.09383e-06
BORA	Bone marrow versus cord blood	0.313651	0.515027	2.06642e-05
CASP3	Bone marrow versus cord blood	0.314317	0.515322	-2.72645e-05
HDAC1	Bone marrow versus cord blood	0.315055	0.515322	-1.75011e-05
MITF	Bone marrow versus cord blood	0.315907	0.516047	-2.432e-05
FAS	Bone marrow versus cord blood	0.321884	0.523238	-0.000739126
MEF2C	Bone marrow versus cord blood	0.321967	0.523238	-4.22049e-05
SIRT1	Bone marrow versus cord blood	0.321923	0.523238	-0.000250918
MSX1	Bone marrow versus cord blood	0.332502	0.534851	-8.474e-08
LRP5	Bone marrow versus cord blood	0.334271	0.537149	0.00145221
SPEN	Bone marrow versus cord blood	0.336033	0.53943	-1.28575e-09
HDAC6	Bone marrow versus cord blood	0.336852	0.539776	0.000212327
MYCN	Bone marrow versus cord blood	0.336933	0.539776	-5.02902e-06
SUZ12.EZH2	Bone marrow versus cord blood	0.338787	0.542197	9.83495e-05
CoREST.HDAC.complex	Bone marrow versus cord blood	0.341036	0.544691	1.32825e-07
PTPRC	Bone marrow versus cord blood	0.347965	0.550309	-0.0027466
SKP2	Bone marrow versus cord blood	0.347636	0.550309	2.36278e-07
ZEB1	Bone marrow versus cord blood	0.346549	0.550309	-1.99692e-07
TRAF1	Bone marrow versus cord blood	0.349867	0.551539	0.0009727
CUL3	Bone marrow versus cord blood	0.353466	0.554442	-2.94638e-08
MYOD.HEB	Bone marrow versus cord blood	0.354297	0.555194	-2.56482e-05
NFYB	Bone marrow versus cord blood	0.356616	0.558273	-2.99327e-15
DVL3	Bone marrow versus cord blood	0.358573	0.558549	-5.01788e-07
MYB	Bone marrow versus cord blood	0.359269	0.558549	1.94496e-05
KMT2A	Bone marrow versus cord blood	0.369388	0.567018	-2.58913e-06
MAP2K6	Bone marrow versus cord blood	0.369044	0.567018	-6.64084e-06
MAP3K11	Bone marrow versus cord blood	0.370087	0.567081	-3.11377e-05
STK11	Bone marrow versus cord blood	0.370319	0.567081	1.35351e-05
CDK7	Bone marrow versus cord blood	0.371081	0.567409	1.6837e-07
CSNK2A1	Bone marrow versus cord blood	0.373703	0.570313	0.000333267
TCF4	Bone marrow versus cord blood	0.375747	0.571774	0.000404255
CyclinB.CDK1	Bone marrow versus cord blood	0.383921	0.58085	4.39731e-07
SMARCD3	Bone marrow versus cord blood	0.383555	0.58085	-2.52214e-05
TEAD1	Bone marrow versus cord blood	0.390624	0.588172	-0.000364547
RARG	Bone marrow versus cord blood	0.393792	0.591813	3.69141e-07
EED	Bone marrow versus cord blood	0.39556	0.593904	1.43907e-06
ROBO1	Bone marrow versus cord blood	0.410801	0.60966	-1.82413e-05
RPL10	Bone marrow versus cord blood	0.41663	0.614431	2.05331e-07
RPS6KA2	Bone marrow versus cord blood	0.418147	0.616094	4.91089e-06
SMAD5	Bone marrow versus cord blood	0.418881	0.6166	1.04723e-08
AKT	Bone marrow versus cord blood	0.420397	0.616838	-0.000668319
MYBL2	Bone marrow versus cord blood	0.419917	0.616838	-1.02704e-07
ELF3	Bone marrow versus cord blood	0.421367	0.617379	-2.04702e-07
PRKCZ	Bone marrow versus cord blood	0.436553	0.634913	3.99146e-05
KAT2B	Bone marrow versus cord blood	0.439202	0.635862	-1.15244e-07
PIAS1	Bone marrow versus cord blood	0.438415	0.635862	-2.52658e-06
PPP2CB	Bone marrow versus cord blood	0.439174	0.635862	9.94722e-09
TCF7L2	Bone marrow versus cord blood	0.438554	0.635862	-2.9404e-06
PARD6A	Bone marrow versus cord blood	0.444545	0.642392	-4.11447e-05
IL6ST	Bone marrow versus cord blood	0.453107	0.650536	-0.00171486
FLI1	Bone marrow versus cord blood	0.459379	0.656019	-9.41121e-05
REST	Bone marrow versus cord blood	0.459193	0.656019	1.49364e-15
ETS1	Bone marrow versus cord blood	0.471625	0.663894	-4.75408e-05
NCOR2	Bone marrow versus cord blood	0.474127	0.665241	-6.09615e-07
ERBB4	Bone marrow versus cord blood	0.478503	0.66703	-0.000182031
NFATC1	Bone marrow versus cord blood	0.476627	0.66703	-1.77409e-05
PAK1	Bone marrow versus cord blood	0.477714	0.66703	-2.65712e-05
PTPN1	Bone marrow versus cord blood	0.48041	0.668507	-0.000814048
REL	Bone marrow versus cord blood	0.481902	0.669403	3.99401e-06
WT1	Bone marrow versus cord blood	0.482947	0.669676	-2.00586e-06
ROBO	Bone marrow versus cord blood	0.486151	0.672935	-8.92162e-08
NR5A1	Bone marrow versus cord blood	0.499723	0.683923	-1.50683e-05
PAX6	Bone marrow versus cord blood	0.502211	0.6851	-2.55724e-05
PPP2R5C	Bone marrow versus cord blood	0.503699	0.685795	9.62289e-06
STAT6	Bone marrow versus cord blood	0.506324	0.687103	-0.000844091
STK4	Bone marrow versus cord blood	0.505798	0.687103	1.20337e-05
E4F1	Bone marrow versus cord blood	0.510178	0.690932	-2.94657e-08
RPS6KB1	Bone marrow versus cord blood	0.510536	0.690932	-1.17371e-05
FOXO4	Bone marrow versus cord blood	0.513584	0.693865	1.27047e-05
LATS2	Bone marrow versus cord blood	0.519595	0.697562	-1.26356e-06
PRKCA	Bone marrow versus cord blood	0.522239	0.699819	1.04518e-05
CSNK1E	Bone marrow versus cord blood	0.523685	0.699874	4.14453e-10
THRA	Bone marrow versus cord blood	0.523877	0.699874	-3.01929e-07
NFKB1	Bone marrow versus cord blood	0.53193	0.707746	-2.35792e-05
JNK	Bone marrow versus cord blood	0.533471	0.708716	3.87233e-05
ID3	Bone marrow versus cord blood	0.539646	0.712603	1.10536e-07
IKBKB	Bone marrow versus cord blood	0.539377	0.712603	0.000126571
Calcineurin	Bone marrow versus cord blood	0.542706	0.715447	-2.80921e-06
NFY	Bone marrow versus cord blood	0.544094	0.716678	-2.20956e-10
MYOD1	Bone marrow versus cord blood	0.546163	0.718204	0.000750474
NfKb.p65.p50	Bone marrow versus cord blood	0.546003	0.718204	0.000731518
PARD6.SMURF1	Bone marrow versus cord blood	0.551328	0.722587	1.91953e-06
YWHAB	Bone marrow versus cord blood	0.552286	0.723243	1.22787e-05
RUNX1	Bone marrow versus cord blood	0.572009	0.741923	-0.00020291
MAX	Bone marrow versus cord blood	0.574346	0.742883	-1.99419e-05
TICAM1	Bone marrow versus cord blood	0.574167	0.742883	0.000235348
PRC2	Bone marrow versus cord blood	0.57666	0.743341	4.20098e-05
PRKCQ	Bone marrow versus cord blood	0.575772	0.743341	-1.71583e-05
RARA	Bone marrow versus cord blood	0.576686	0.743341	4.8491e-06
PPP1CA	Bone marrow versus cord blood	0.581145	0.745567	-1.62435e-05
GLI3	Bone marrow versus cord blood	0.584393	0.74725	9.48801e-06
PKCtheta.Nfix	Bone marrow versus cord blood	0.583658	0.74725	-1.42168e-07
POU2F1	Bone marrow versus cord blood	0.594643	0.754905	-4.20628e-08
SMC3	Bone marrow versus cord blood	0.596357	0.755865	-1.86012e-06
TLRs	Bone marrow versus cord blood	0.603717	0.763354	-0.00051088
MAP3K14	Bone marrow versus cord blood	0.60467	0.763792	-7.31266e-06
USF1	Bone marrow versus cord blood	0.606727	0.763792	-1.52357e-05
NR2C2	Bone marrow versus cord blood	0.613955	0.769751	-4.59581e-08
HDAC2	Bone marrow versus cord blood	0.615437	0.77015	2.17514e-06
NAE	Bone marrow versus cord blood	0.616386	0.770726	3.20931e-06
PHB2	Bone marrow versus cord blood	0.621594	0.774172	6.61578e-06
NEDD4L	Bone marrow versus cord blood	0.627762	0.779566	-1.20319e-06
PRDM1	Bone marrow versus cord blood	0.628797	0.779593	3.83313e-09
TLR4	Bone marrow versus cord blood	0.628911	0.779593	0.000577301
BCR.ABL.fusion	Bone marrow versus cord blood	0.632007	0.781588	-4.62644e-05
EGR1	Bone marrow versus cord blood	0.637231	0.784906	-0.000288661
MAP2K2	Bone marrow versus cord blood	0.638171	0.784906	2.73487e-06
PTPN2	Bone marrow versus cord blood	0.638141	0.784906	-4.87994e-05
KIT	Bone marrow versus cord blood	0.641308	0.787536	0.000906408
AKT2	Bone marrow versus cord blood	0.642388	0.788249	-0.000103643
RPS6KA3	Bone marrow versus cord blood	0.64381	0.788267	0.000229261
NFYA	Bone marrow versus cord blood	0.650491	0.793257	9.32774e-08
AURKB	Bone marrow versus cord blood	0.652344	0.79429	-9.96096e-08
PRMT5	Bone marrow versus cord blood	0.659822	0.801538	3.1922e-05
LCK	Bone marrow versus cord blood	0.667246	0.808723	0.000338063
AURKA	Bone marrow versus cord blood	0.67031	0.810126	1.00711e-06
ELK1	Bone marrow versus cord blood	0.670605	0.810126	0.000324316
ULK1	Bone marrow versus cord blood	0.67164	0.810126	-1.66102e-06
CUL1	Bone marrow versus cord blood	0.677236	0.812683	-3.93502e-09
ITCH	Bone marrow versus cord blood	0.678102	0.813104	2.43121e-05
EWSR1	Bone marrow versus cord blood	0.679256	0.813869	-1.79403e-05
AHR	Bone marrow versus cord blood	0.680165	0.813881	-5.08379e-12
TGFBR1	Bone marrow versus cord blood	0.68262	0.813881	0.00134652
PRKCB	Bone marrow versus cord blood	0.686465	0.816309	2.04448e-06
CIITA	Bone marrow versus cord blood	0.688606	0.81706	0.000104283
POU3F1	Bone marrow versus cord blood	0.689685	0.81706	-6.25508e-08
YAP1	Bone marrow versus cord blood	0.689283	0.81706	-0.000242555
HMGA2	Bone marrow versus cord blood	0.692301	0.81752	-5.01603e-06
PRKACA	Bone marrow versus cord blood	0.697166	0.820991	0.000141118
MAPK7	Bone marrow versus cord blood	0.704517	0.826564	8.06563e-10
PTCRA	Bone marrow versus cord blood	0.704185	0.826564	-0.000409378
MKL1	Bone marrow versus cord blood	0.708908	0.830481	4.12547e-06
PDGFRA	Bone marrow versus cord blood	0.7142	0.833586	0.00104745
SRF	Bone marrow versus cord blood	0.716782	0.834967	-8.93407e-06
SIK1	Bone marrow versus cord blood	0.724829	0.840397	4.33937e-08
FOXO3	Bone marrow versus cord blood	0.729886	0.843781	1.29476e-05
PPARGC1A	Bone marrow versus cord blood	0.733463	0.847295	-1.05324e-05
CASP8AP2	Bone marrow versus cord blood	0.735341	0.848736	-2.78405e-07
PPARA	Bone marrow versus cord blood	0.736596	0.849049	-3.88504e-06
BCAR1	Bone marrow versus cord blood	0.73721	0.849137	3.28696e-05
PRKAA2	Bone marrow versus cord blood	0.738498	0.849999	-2.73754e-06
LAT	Bone marrow versus cord blood	0.744683	0.854004	-0.000306531
CDKN2A	Bone marrow versus cord blood	0.757409	0.866942	8.15218e-07
CUL4A	Bone marrow versus cord blood	0.7606	0.866942	-4.21592e-09
EGFR	Bone marrow versus cord blood	0.759366	0.866942	-0.00114459
ERCC6	Bone marrow versus cord blood	0.760909	0.866942	-5.90507e-06
JAG2	Bone marrow versus cord blood	0.760633	0.866942	-0.000742087
RFXAP	Bone marrow versus cord blood	0.759437	0.866942	-3.48598e-11
PRKAA1	Bone marrow versus cord blood	0.764295	0.869544	-2.95557e-06
PLCG1	Bone marrow versus cord blood	0.772834	0.877361	-5.45106e-05
ATF4	Bone marrow versus cord blood	0.777769	0.878039	2.96268e-06
MAPK8	Bone marrow versus cord blood	0.776705	0.878039	0.000360385
PTEN	Bone marrow versus cord blood	0.781706	0.879422	-9.0537e-05
FGFR4	Bone marrow versus cord blood	0.792936	0.887913	-0.000905906
HRAS	Bone marrow versus cord blood	0.795565	0.888549	-4.71124e-05
MAP3K5	Bone marrow versus cord blood	0.796628	0.888549	-2.31245e-05
RNF111	Bone marrow versus cord blood	0.80124	0.890966	1.76118e-06
NR1H3	Bone marrow versus cord blood	0.806676	0.892661	-9.30174e-07
FOSL1	Bone marrow versus cord blood	0.812677	0.897414	-7.05725e-08
SMO	Bone marrow versus cord blood	0.815586	0.899997	-0.000664064
CDK1	Bone marrow versus cord blood	0.822996	0.903323	-0.000388174
ERK1.2	Bone marrow versus cord blood	0.828848	0.906391	-0.000143259
GNG12	Bone marrow versus cord blood	0.834762	0.910335	-0.000138922
HOXA9	Bone marrow versus cord blood	0.842259	0.91346	2.20243e-07
NAE1	Bone marrow versus cord blood	0.841892	0.91346	-2.05726e-05
JAK3	Bone marrow versus cord blood	0.845311	0.914884	4.33614e-05
CASP8	Bone marrow versus cord blood	0.851562	0.920387	8.06312e-06
KLF1	Bone marrow versus cord blood	0.85839	0.925865	-6.75188e-07
AHR.ARNT	Bone marrow versus cord blood	0.870193	0.932593	3.68732e-09
MYBL1	Bone marrow versus cord blood	0.876526	0.93837	-9.94902e-08
PPARD	Bone marrow versus cord blood	0.877641	0.938927	-8.09006e-08
DLX5	Bone marrow versus cord blood	0.88159	0.939594	2.09109e-06
HAND1	Bone marrow versus cord blood	0.880264	0.939594	2.18382e-07
NOTCH2	Bone marrow versus cord blood	0.882433	0.939594	0.000299418
PIK3CA	Bone marrow versus cord blood	0.880922	0.939594	8.83782e-06
ELF1	Bone marrow versus cord blood	0.887426	0.940529	6.45808e-07
JAG1	Bone marrow versus cord blood	0.886608	0.940529	0.000366957
NOS1	Bone marrow versus cord blood	0.886591	0.940529	3.72189e-07
JUND	Bone marrow versus cord blood	0.900444	0.947899	2.445e-05
ILF3	Bone marrow versus cord blood	0.903895	0.950832	-1.42109e-05
ADAM17	Bone marrow versus cord blood	0.905903	0.951108	-0.000168381
CHEK2	Bone marrow versus cord blood	0.911661	0.955247	5.179e-07
TFEB	Bone marrow versus cord blood	0.914861	0.957964	-1.09192e-06
FBXW7	Bone marrow versus cord blood	0.919542	0.959909	-2.6159e-08
CXCL1	Bone marrow versus cord blood	0.921993	0.960968	2.50341e-05
SGK3	Bone marrow versus cord blood	0.928419	0.965751	-3.76478e-07
CDK5	Bone marrow versus cord blood	0.930339	0.96619	1.3697e-05
SMAD1	Bone marrow versus cord blood	0.93316	0.96813	-2.95213e-06
AKT1	Bone marrow versus cord blood	0.942308	0.970178	-5.64032e-05
MAPK3	Bone marrow versus cord blood	0.94165	0.970178	-5.67855e-05
TBX3	Bone marrow versus cord blood	0.941082	0.970178	-1.14087e-06
TRAF6	Bone marrow versus cord blood	0.938808	0.970178	-1.28277e-05
IGF1R	Bone marrow versus cord blood	0.945714	0.970941	7.36502e-05
PPARG	Bone marrow versus cord blood	0.949067	0.97375	-2.53594e-06
VAV1	Bone marrow versus cord blood	0.950798	0.974352	2.9392e-06
FOXO1	Bone marrow versus cord blood	0.954718	0.975741	-1.38138e-06
TYK2	Bone marrow versus cord blood	0.959758	0.977019	2.54247e-05
IRF3	Bone marrow versus cord blood	0.962947	0.979079	8.38724e-07
NR1H4	Bone marrow versus cord blood	0.970187	0.984537	-1.32528e-08
ZFYVE9	Bone marrow versus cord blood	0.971003	0.98472	-4.88768e-06
DLK1	Bone marrow versus cord blood	0.978257	0.989534	3.99178e-05
BMI1	Bone marrow versus cord blood	0.980847	0.989988	3.41606e-07
SREBF1	Bone marrow versus cord blood	0.984087	0.990995	-7.73392e-07
PRKD1	Bone marrow versus cord blood	0.98523	0.991513	1.43776e-06
FLT3	Bone marrow versus cord blood	0.9961	0.996827	-1.03574e-05
MEF2D	Bone marrow versus cord blood	0.994416	0.996827	-1.52713e-07
PGR	Bone marrow versus cord blood	0.995051	0.996827	1.10335e-07
VDR	Bone marrow versus cord blood	0.993456	0.996827	3.19968e-08
