# Supplementary material for: Knowledge-primed neural networks enable biologically interpretable deep learning on single-cell sequencing data
Source: Genome Biol. 2020 Aug 3;21:190. doi: 10.1186/s13059-020-02100-5 (PMC7397672; doi:10.1186/s13059-020-02100-5)
Supplement: Supplementary file 8 — Additional file 8: Table S6. Differential node weights comparing GEN KPNNs trained to distinguish leukemic and normal cells at different stages of hematopoietic differentiation for acute myeloid leukemia (AML). [file 13059_2020_2100_MOESM8_ESM.xlsx]

## Sheet: Table S6
Node	Comparison	p-value	Adjusted p-value	Differential node weight
REST	HSC versus Prog	4.21896e-06	0.00210526	-0.795991
RCOR1	HSC versus Prog	2.87359e-05	0.00716961	-0.560063
IRF3	HSC versus Prog	0.000523185	0.0496282	0.277198
TCF12	HSC versus Prog	0.000529574	0.0496282	-0.350495
IKBKE	HSC versus Prog	0.000566507	0.0496282	0.509704
BCL3	HSC versus Prog	0.000596954	0.0496282	-0.442256
REL	HSC versus Prog	0.000891985	0.0496282	0.472389
NR2F2	HSC versus Prog	0.000899704	0.0496282	-0.474959
PPP2CB	HSC versus Prog	0.000977283	0.0496282	-0.421855
MAF	HSC versus Prog	0.00104214	0.0496282	0.266887
Calcineurin	HSC versus Prog	0.00109401	0.0496282	0.356186
AURKB	HSC versus Prog	0.00178911	0.0686489	-0.379822
AMPK	HSC versus Prog	0.00195783	0.0686489	-0.299578
MYCN	HSC versus Prog	0.00199347	0.0686489	-0.350301
MYOG	HSC versus Prog	0.00206359	0.0686489	-0.310538
SREBF2	HSC versus Prog	0.00279231	0.0847474	0.246491
NR2F1	HSC versus Prog	0.00291311	0.0847474	-0.410472
MAPKAPK2	HSC versus Prog	0.00321978	0.0847474	0.21266
BMPR1A	HSC versus Prog	0.00335429	0.0847474	0.323892
TBK1	HSC versus Prog	0.00347821	0.0847474	0.332506
MYOD1	HSC versus Prog	0.00356652	0.0847474	-0.19127
RYK	HSC versus Prog	0.00426963	0.0968429	0.338542
YY1	HSC versus Prog	0.00452098	0.097241	-0.211071
ZEB1	HSC versus Prog	0.00467692	0.097241	-0.361695
RXRB	HSC versus Prog	0.00493939	0.0985902	-0.312329
TRAF2	HSC versus Prog	0.00535397	0.102755	0.224125
CRTC3	HSC versus Prog	0.00563508	0.10302	-0.389753
SMC3	HSC versus Prog	0.00589839	0.10302	-0.242612
JUN	HSC versus Prog	0.00598711	0.10302	-0.130787
TRAF1	HSC versus Prog	0.00639414	0.106356	0.209006
SUFU	HSC versus Prog	0.0071835	0.108906	0.244738
EWSR1	HSC versus Prog	0.00718746	0.108906	-0.190303
SMAD5	HSC versus Prog	0.00723318	0.108906	0.366795
CAMKK2	HSC versus Prog	0.00742046	0.108906	0.207015
IL4R	HSC versus Prog	0.00779484	0.111132	0.176725
TICAM1	HSC versus Prog	0.00834506	0.115672	0.228353
SMAD4	HSC versus Prog	0.00885767	0.119459	0.192583
MAP3K14	HSC versus Prog	0.00946432	0.122584	0.217662
SUZ12	HSC versus Prog	0.00990488	0.122584	-0.481103
PBX1	HSC versus Prog	0.0100592	0.122584	-0.336631
DYRK1B	HSC versus Prog	0.010072	0.122584	0.332401
CoREST.HDAC.complex	HSC versus Prog	0.0104454	0.124042	-0.230519
SIK1	HSC versus Prog	0.010689	0.124042	-0.264151
LRP6	HSC versus Prog	0.0119111	0.132697	0.184955
HIF1A	HSC versus Prog	0.0119666	0.132697	0.176852
BAD	HSC versus Prog	0.0162917	0.176402	0.162563
JUND	HSC versus Prog	0.016615	0.176402	-0.135497
TRIM28	HSC versus Prog	0.017799	0.179777	-0.341225
TRAF3	HSC versus Prog	0.0179056	0.179777	0.236372
ZNF217	HSC versus Prog	0.0180137	0.179777	-0.291423
EZH2	HSC versus Prog	0.0189675	0.185252	-0.116343
RPS6KA3	HSC versus Prog	0.0193048	0.185252	0.180098
STK4	HSC versus Prog	0.0213658	0.201161	0.180552
PLCG1	HSC versus Prog	0.0218844	0.202228	0.177071
NOTCH3	HSC versus Prog	0.0229927	0.208606	0.170861
PRKCD	HSC versus Prog	0.0268356	0.239124	-0.191864
E2F3	HSC versus Prog	0.0275348	0.24105	-0.230654
PDGFRA	HSC versus Prog	0.0292854	0.243895	0.137177
CHEK1	HSC versus Prog	0.0296599	0.243895	-0.181525
CYLD	HSC versus Prog	0.0297334	0.243895	-0.197427
PPP3CB	HSC versus Prog	0.0298148	0.243895	0.194257
PKCtheta.Nfix	HSC versus Prog	0.0309882	0.244358	0.219614
PSENEN	HSC versus Prog	0.0310658	0.244358	0.21304
P300.PCAF	HSC versus Prog	0.0318085	0.244358	0.25419
MYC	HSC versus Prog	0.0318302	0.244358	-0.0890407
AHR.ARNT	HSC versus Prog	0.0326848	0.247117	-0.27715
LTBR	HSC versus Prog	0.0346857	0.258331	0.171731
MYOD.HEB	HSC versus Prog	0.036006	0.260182	-0.183876
NOTCH2	HSC versus Prog	0.0363235	0.260182	0.146312
RANBP9	HSC versus Prog	0.0364985	0.260182	0.215035
KDM1A	HSC versus Prog	0.0371939	0.261405	-0.258296
STAT6	HSC versus Prog	0.0377869	0.261884	0.142171
AHR	HSC versus Prog	0.0383691	0.261933	-0.305377
LATS1	HSC versus Prog	0.0388438	0.261933	0.201709
SUZ12.EZH2	HSC versus Prog	0.0398035	0.264826	-0.285494
CREBBP	HSC versus Prog	0.0412194	0.268457	0.15013
FOXP3	HSC versus Prog	0.0414252	0.268457	0.216487
FOXO3	HSC versus Prog	0.043503	0.278308	0.147372
BORA	HSC versus Prog	0.0444542	0.280793	0.162296
PRC2	HSC versus Prog	0.046367	0.289214	-0.280873
TNFRSF13C	HSC versus Prog	0.0476767	0.293712	0.155523
STK11	HSC versus Prog	0.0487144	0.294798	-0.141828
UBTF	HSC versus Prog	0.0490346	0.294798	0.150181
USF1	HSC versus Prog	0.052024	0.306776	-0.230488
NCOR1	HSC versus Prog	0.0524373	0.306776	0.15555
MXI1	HSC versus Prog	0.0528712	0.306776	-0.208915
HDAC1	HSC versus Prog	0.0543341	0.309445	-0.154286
TCF4	HSC versus Prog	0.0545715	0.309445	-0.158985
MAP2K3	HSC versus Prog	0.055473	0.309904	0.163802
TP63	HSC versus Prog	0.0570272	0.309904	0.146784
MAP2K1	HSC versus Prog	0.0576232	0.309904	-0.143327
KAT2B	HSC versus Prog	0.0577365	0.309904	0.227474
CSNK1D	HSC versus Prog	0.0577577	0.309904	0.170586
NCOA1	HSC versus Prog	0.0590017	0.311203	0.156673
MAP3K5	HSC versus Prog	0.059247	0.311203	0.146177
NPM1	HSC versus Prog	0.0612303	0.314379	0.18124
BRCA1	HSC versus Prog	0.0614638	0.314379	0.132523
TEAD4	HSC versus Prog	0.0617418	0.314379	0.177772
CRX	HSC versus Prog	0.0656962	0.331135	0.160138
FHL2	HSC versus Prog	0.0666174	0.332421	0.228631
EED	HSC versus Prog	0.0684466	0.338167	-0.311411
CTNNB1	HSC versus Prog	0.0692931	0.338993	-0.102992
SMAD3	HSC versus Prog	0.0732385	0.351846	-0.145375
PRKCI	HSC versus Prog	0.0733307	0.351846	0.206108
MAZ	HSC versus Prog	0.0749978	0.354376	-0.126967
SETDB1	HSC versus Prog	0.0752783	0.354376	-0.35857
CSNK2A1	HSC versus Prog	0.0772166	0.360104	-0.113094
CAMKK1	HSC versus Prog	0.0789503	0.36478	0.197199
JNK	HSC versus Prog	0.0836036	0.381088	-0.134697
SYK	HSC versus Prog	0.0840074	0.381088	0.182355
SIRT2	HSC versus Prog	0.085391	0.383875	0.240934
PPP3CC	HSC versus Prog	0.08695	0.387393	0.166127
MYOD1.SWI.SNF.complex	HSC versus Prog	0.0886312	0.391389	-0.156702
CCND1	HSC versus Prog	0.0913832	0.400002	0.128648
CDKN1A	HSC versus Prog	0.0925018	0.401161	-0.107913
NCOA3	HSC versus Prog	0.0932559	0.401161	0.119473
APP	HSC versus Prog	0.0955916	0.407694	0.128933
HTT	HSC versus Prog	0.0970973	0.408353	0.129852
DLX5	HSC versus Prog	0.0973829	0.408353	0.136024
ESR1	HSC versus Prog	0.100168	0.41571	0.093257
PPP3CA	HSC versus Prog	0.101995	0.41571	0.1441
ROCK1	HSC versus Prog	0.102004	0.41571	0.168059
EGR1	HSC versus Prog	0.103612	0.41571	-0.093161
SOX2	HSC versus Prog	0.103632	0.41571	-0.133693
NAE1	HSC versus Prog	0.104136	0.41571	0.166441
MET	HSC versus Prog	0.105877	0.419306	0.132618
SMARCA4	HSC versus Prog	0.107759	0.423399	-0.141405
PIK3CA	HSC versus Prog	0.109597	0.427257	0.128538
NR4A1	HSC versus Prog	0.111402	0.430926	0.123818
FADD	HSC versus Prog	0.113443	0.435448	0.159725
HSP90AB1	HSC versus Prog	0.114336	0.435525	0.180769
PTPN2	HSC versus Prog	0.11714	0.440455	0.141011
PRKCE	HSC versus Prog	0.117396	0.440455	-0.13335
ADAM17	HSC versus Prog	0.119401	0.443772	0.122254
NFATC1	HSC versus Prog	0.120058	0.443772	0.113165
CUL3	HSC versus Prog	0.125855	0.461778	0.208778
PLK1	HSC versus Prog	0.126995	0.462558	-0.214318
SIRT1	HSC versus Prog	0.129438	0.467186	0.10951
MAPK14	HSC versus Prog	0.13153	0.467186	-0.0993326
TFDP1	HSC versus Prog	0.132111	0.467186	0.125527
JAK2	HSC versus Prog	0.132679	0.467186	-0.104002
FGFR1	HSC versus Prog	0.132947	0.467186	0.120265
NFE2L2	HSC versus Prog	0.1348	0.468422	-0.130281
SF1	HSC versus Prog	0.135176	0.468422	-0.249969
KIT	HSC versus Prog	0.136381	0.469338	0.116585
EP300	HSC versus Prog	0.137747	0.470794	-0.0667196
RARG	HSC versus Prog	0.142281	0.482982	-0.139382
TYK2	HSC versus Prog	0.146066	0.491848	0.119908
GSK3B.Axin.APC	HSC versus Prog	0.146864	0.491848	0.112859
RNF111	HSC versus Prog	0.149784	0.495034	0.170164
ARNT	HSC versus Prog	0.1498	0.495034	-0.139906
JAG1	HSC versus Prog	0.151511	0.497395	0.105459
PTEN	HSC versus Prog	0.15325	0.499815	0.100334
CHD7	HSC versus Prog	0.156034	0.50559	-0.263743
ELK1	HSC versus Prog	0.157917	0.50839	-0.0745507
CAMK1	HSC versus Prog	0.160342	0.512889	0.136
SKIL	HSC versus Prog	0.161957	0.514756	0.203387
RHOA	HSC versus Prog	0.164922	0.517699	0.132416
PHB2	HSC versus Prog	0.164958	0.517699	0.117101
SMAD2	HSC versus Prog	0.166763	0.51809	0.0884679
RFXANK	HSC versus Prog	0.167159	0.51809	-0.201675
JAG2	HSC versus Prog	0.1689	0.520255	0.0955802
FOSL1	HSC versus Prog	0.172929	0.529397	-0.198571
MAPK11	HSC versus Prog	0.176122	0.53156	-0.124497
RPS6KA5	HSC versus Prog	0.177272	0.53156	0.0983277
ZFYVE9	HSC versus Prog	0.177333	0.53156	0.135846
AXIN1	HSC versus Prog	0.178142	0.53156	0.114363
CEBPD	HSC versus Prog	0.178962	0.53156	-0.184382
GNA13	HSC versus Prog	0.181048	0.534575	0.134507
CXCL1	HSC versus Prog	0.182146	0.534653	-0.128861
RFX.complex	HSC versus Prog	0.185849	0.542331	-0.171968
CDK7	HSC versus Prog	0.188473	0.545587	0.154701
TFAP2A	HSC versus Prog	0.189152	0.545587	-0.110461
CEBPA	HSC versus Prog	0.190764	0.547075	0.10133
Myog.SWI.SNF.complex	HSC versus Prog	0.193693	0.54727	-0.193546
LEF1	HSC versus Prog	0.194017	0.54727	-0.0991818
SET	HSC versus Prog	0.194122	0.54727	-0.117673
KLF4	HSC versus Prog	0.195994	0.549443	-0.106922
PIN1	HSC versus Prog	0.19881	0.549508	-0.114055
PRKDC	HSC versus Prog	0.20098	0.549508	-0.197371
KRAS	HSC versus Prog	0.202081	0.549508	0.161286
SMAD1	HSC versus Prog	0.203518	0.549508	0.0784921
CDX2	HSC versus Prog	0.203695	0.549508	-0.0844752
SETDB1.NLK.CHD7	HSC versus Prog	0.20374	0.549508	-0.202137
ILF3	HSC versus Prog	0.204121	0.549508	0.0947036
RELA	HSC versus Prog	0.205833	0.549508	-0.0597665
PAX6	HSC versus Prog	0.205928	0.549508	-0.130082
TCF7L2	HSC versus Prog	0.211094	0.553955	-0.109525
TLR4	HSC versus Prog	0.212156	0.553955	0.101868
NAE	HSC versus Prog	0.21248	0.553955	0.153697
BMI1	HSC versus Prog	0.212913	0.553955	0.0980191
PRKACA	HSC versus Prog	0.216336	0.553955	-0.123338
STAT5B	HSC versus Prog	0.217411	0.553955	0.0956186
NFYA	HSC versus Prog	0.21881	0.553955	0.137838
CDKN2A	HSC versus Prog	0.22043	0.553955	0.145566
TFCP2	HSC versus Prog	0.220816	0.553955	0.0937812
NEDD4L	HSC versus Prog	0.221534	0.553955	0.112081
PRKCA	HSC versus Prog	0.221652	0.553955	-0.100432
FOXA2	HSC versus Prog	0.221725	0.553955	-0.166914
HNF4A	HSC versus Prog	0.222026	0.553955	-0.0958855
NUAK1	HSC versus Prog	0.223296	0.554353	0.099298
PPP1CC	HSC versus Prog	0.225753	0.557678	-0.185416
IL1R1	HSC versus Prog	0.228848	0.562538	-0.0449211
PRKG1	HSC versus Prog	0.232441	0.568082	-0.163242
MLL.SET.subcomplex	HSC versus Prog	0.23338	0.568082	-0.153243
IGF1R	HSC versus Prog	0.23501	0.568151	-0.0886022
PPP1R15A	HSC versus Prog	0.235686	0.568151	-0.145357
VDR	HSC versus Prog	0.24254	0.580033	-0.120889
NFY	HSC versus Prog	0.24294	0.580033	0.155285
RFXAP	HSC versus Prog	0.244981	0.581751	-0.170168
GABARAP	HSC versus Prog	0.245991	0.581751	-0.0888405
GLI1	HSC versus Prog	0.24755	0.582676	-0.086476
MLL2.complex	HSC versus Prog	0.252153	0.589445	0.136519
ETS1	HSC versus Prog	0.252788	0.589445	-0.143456
LRP5	HSC versus Prog	0.25938	0.602002	0.0852452
YWHAZ	HSC versus Prog	0.261383	0.603843	0.0747157
ATM	HSC versus Prog	0.273826	0.626892	-0.101855
GATA6	HSC versus Prog	0.273873	0.626892	0.114904
p38	HSC versus Prog	0.278781	0.635169	-0.143571
HDAC6	HSC versus Prog	0.280034	0.635169	0.0865416
POU2F1	HSC versus Prog	0.283652	0.635999	0.108198
NFYB	HSC versus Prog	0.283718	0.635999	0.157118
TP53	HSC versus Prog	0.284224	0.635999	-0.0654536
MAP3K10	HSC versus Prog	0.286294	0.636467	-0.108942
MEF2A	HSC versus Prog	0.28812	0.636467	0.0739934
TRAF6	HSC versus Prog	0.289159	0.636467	0.105539
HSF2	HSC versus Prog	0.289894	0.636467	0.157056
SKP2	HSC versus Prog	0.291128	0.636467	0.144369
ABL1	HSC versus Prog	0.292086	0.636467	-0.0858295
PDPK1	HSC versus Prog	0.299441	0.649657	-0.0679986
ERCC6	HSC versus Prog	0.300877	0.649947	0.113437
BCAR1	HSC versus Prog	0.302237	0.65007	0.0814427
TBX3	HSC versus Prog	0.303984	0.650661	-0.0944016
PRKCZ	HSC versus Prog	0.30512	0.650661	-0.12686
RUNX2	HSC versus Prog	0.309441	0.65511	-0.0720102
RPS6KA2	HSC versus Prog	0.309831	0.65511	0.114831
TCF3	HSC versus Prog	0.313265	0.659575	-0.0379566
RXRA	HSC versus Prog	0.317597	0.664409	-0.0665517
SDC4	HSC versus Prog	0.318224	0.664409	-0.118814
MAX	HSC versus Prog	0.323944	0.673533	-0.0734427
KMT2D	HSC versus Prog	0.328656	0.680494	0.115557
ULK1.Atg13.Fip200	HSC versus Prog	0.332963	0.685799	0.123885
IKK.complex	HSC versus Prog	0.333966	0.685799	0.0717721
MAPK3	HSC versus Prog	0.336539	0.687755	0.0490813
MLL1.complex	HSC versus Prog	0.340233	0.687755	-0.104152
SGK3	HSC versus Prog	0.34154	0.687755	-0.109915
HDAC2	HSC versus Prog	0.341893	0.687755	-0.0785534
RASA1	HSC versus Prog	0.342809	0.687755	0.0959078
KLF1	HSC versus Prog	0.343188	0.687755	-0.0986583
CSNK2B	HSC versus Prog	0.347078	0.68807	0.130633
AR	HSC versus Prog	0.347266	0.68807	-0.0616568
MAP3K7	HSC versus Prog	0.347482	0.68807	-0.0822889
MAFK	HSC versus Prog	0.349674	0.689674	-0.129969
CDC25A	HSC versus Prog	0.353694	0.694462	0.125185
ID3	HSC versus Prog	0.354885	0.694462	0.120653
TLRs	HSC versus Prog	0.357842	0.697513	0.0759119
CDK6	HSC versus Prog	0.363374	0.705539	-0.0849086
MAPK12	HSC versus Prog	0.368872	0.711929	0.0824744
ERBB2	HSC versus Prog	0.369518	0.711929	0.0522463
NR1H4	HSC versus Prog	0.37344	0.716717	-0.0967788
SGK1	HSC versus Prog	0.387621	0.738194	-0.0854261
MAPK8IP1	HSC versus Prog	0.388378	0.738194	-0.079676
RPS6KA4	HSC versus Prog	0.391062	0.738194	0.0665031
MAPK1	HSC versus Prog	0.391926	0.738194	0.0475984
CUL4A	HSC versus Prog	0.393163	0.738194	0.11722
NFKBIA	HSC versus Prog	0.393506	0.738194	-0.0639034
ATF2	HSC versus Prog	0.395372	0.738917	-0.0638105
RUNX3	HSC versus Prog	0.401578	0.747715	-0.0861402
FLI1	HSC versus Prog	0.410648	0.757901	0.0569124
FRS2	HSC versus Prog	0.412777	0.757901	0.0692067
LATS2	HSC versus Prog	0.413501	0.757901	0.0618348
PDX1	HSC versus Prog	0.413723	0.757901	-0.145296
PAX3	HSC versus Prog	0.415696	0.757901	0.0956371
CASP8AP2	HSC versus Prog	0.418243	0.757901	0.0735612
MAPK7	HSC versus Prog	0.419905	0.757901	-0.148984
MAP3K11	HSC versus Prog	0.420271	0.757901	0.0666847
DAB1	HSC versus Prog	0.420719	0.757901	0.0956317
INSR	HSC versus Prog	0.423461	0.760098	-0.0514051
DLL4	HSC versus Prog	0.430331	0.767242	0.0567529
NLK	HSC versus Prog	0.430517	0.767242	-0.0951866
MYB	HSC versus Prog	0.433265	0.769183	-0.0533735
PTCRA	HSC versus Prog	0.434688	0.769183	0.0605963
CyclinE.CDK2	HSC versus Prog	0.437501	0.770089	0.0952994
MAP3K1	HSC versus Prog	0.438287	0.770089	0.0706997
FGFR4	HSC versus Prog	0.441346	0.772742	0.05113
PPARD	HSC versus Prog	0.447823	0.779752	-0.0808751
NR4A2	HSC versus Prog	0.448474	0.779752	-0.0997255
PPM1A	HSC versus Prog	0.457881	0.789229	0.0724923
CDK1	HSC versus Prog	0.458038	0.789229	0.0684311
CUL1	HSC versus Prog	0.45867	0.789229	0.108767
MAPK9	HSC versus Prog	0.462385	0.792887	-0.0489408
TGFBR1	HSC versus Prog	0.465539	0.795562	0.0521996
RPL10	HSC versus Prog	0.468602	0.797126	-0.0912214
SMARCD3	HSC versus Prog	0.470361	0.797126	-0.082072
RBBP5	HSC versus Prog	0.471484	0.797126	-0.102011
TNFRSF1B	HSC versus Prog	0.472844	0.797126	0.0625409
FOS	HSC versus Prog	0.475724	0.799281	0.0494404
FBXW7	HSC versus Prog	0.487434	0.805505	-0.0777177
GSK3A	HSC versus Prog	0.48747	0.805505	0.0547844
KLF5	HSC versus Prog	0.489152	0.805505	-0.0539535
CALM1	HSC versus Prog	0.490125	0.805505	0.0566985
ATR	HSC versus Prog	0.490349	0.805505	-0.0878545
TJP2	HSC versus Prog	0.491819	0.805505	-0.0487979
RBPJ	HSC versus Prog	0.493164	0.805505	-0.0567965
TAL1	HSC versus Prog	0.493444	0.805505	0.0428364
ASH2L	HSC versus Prog	0.493957	0.805505	-0.095195
MEF2D	HSC versus Prog	0.498606	0.808944	-0.0813206
YAP1	HSC versus Prog	0.500636	0.808944	0.0467353
PPP2CA	HSC versus Prog	0.504134	0.808944	0.0870904
INCENP	HSC versus Prog	0.504896	0.808944	-0.0924895
NCK1	HSC versus Prog	0.504963	0.808944	0.0676263
KAT5	HSC versus Prog	0.505793	0.808944	0.0898722
MSX1	HSC versus Prog	0.510653	0.814108	0.0795811
DLL3	HSC versus Prog	0.512719	0.814633	0.0518208
NUMB	HSC versus Prog	0.515275	0.814633	0.0579749
STAT5A	HSC versus Prog	0.51588	0.814633	-0.0364104
PRDM1	HSC versus Prog	0.520147	0.81878	-0.0743254
APEX1	HSC versus Prog	0.527398	0.826741	0.0571978
IL6ST	HSC versus Prog	0.528518	0.826741	0.0451713
SREBF1	HSC versus Prog	0.534	0.828611	0.043742
NR3C1	HSC versus Prog	0.534425	0.828611	0.0335105
MAPK10	HSC versus Prog	0.534852	0.828611	0.0445762
PRKAA2	HSC versus Prog	0.538001	0.828611	-0.0792691
MYOCD	HSC versus Prog	0.538162	0.828611	0.0717385
CASP8	HSC versus Prog	0.54195	0.828611	0.045149
SP1	HSC versus Prog	0.544974	0.828611	-0.0339922
GNG12	HSC versus Prog	0.545007	0.828611	-0.047015
CDON	HSC versus Prog	0.545849	0.828611	-0.0331352
JAK3	HSC versus Prog	0.546319	0.828611	0.0556865
TP53RK	HSC versus Prog	0.549305	0.829081	0.0480123
RANBP3	HSC versus Prog	0.552023	0.829081	0.0504732
CyclinD.CDK4	HSC versus Prog	0.555534	0.829081	-0.0489829
GATA1	HSC versus Prog	0.556007	0.829081	0.0466154
MAFF	HSC versus Prog	0.55657	0.829081	-0.0771497
STAT2	HSC versus Prog	0.556982	0.829081	0.0572936
MAFA	HSC versus Prog	0.558259	0.829081	0.0413323
TEAD1	HSC versus Prog	0.559968	0.829152	-0.0557784
NR1H3	HSC versus Prog	0.563058	0.829333	-0.0587182
CyclinB.CDK1	HSC versus Prog	0.565044	0.829333	-0.0515464
KMT2A	HSC versus Prog	0.565077	0.829333	-0.0852683
SRC	HSC versus Prog	0.569507	0.833384	0.0428311
HMT	HSC versus Prog	0.573676	0.834494	0.0779549
LAT	HSC versus Prog	0.574086	0.834494	0.0453478
MYD88	HSC versus Prog	0.575283	0.834494	0.0374239
YWHAB	HSC versus Prog	0.577099	0.834702	-0.041928
STAT3	HSC versus Prog	0.583563	0.841612	-0.0165343
X14.3.3	HSC versus Prog	0.585471	0.841931	0.041008
PAX7	HSC versus Prog	0.587767	0.842804	0.0518756
HOXA9	HSC versus Prog	0.58998	0.843554	0.0705433
ERBB4	HSC versus Prog	0.596433	0.850343	0.0462827
CDK2	HSC versus Prog	0.602173	0.85608	0.0381016
WWTR1	HSC versus Prog	0.606026	0.85911	-0.0472749
KHSRP	HSC versus Prog	0.611073	0.863812	0.0642551
SGK2	HSC versus Prog	0.613769	0.865039	0.060613
NOS1	HSC versus Prog	0.617652	0.865039	-0.0683442
IKBKG	HSC versus Prog	0.61842	0.865039	-0.0489521
VAV1	HSC versus Prog	0.618876	0.865039	0.052318
RPS6KB1	HSC versus Prog	0.623256	0.868728	-0.0369699
IL10RA	HSC versus Prog	0.62562	0.869148	-0.0337034
HSP90AA1	HSC versus Prog	0.628208	0.869148	-0.0656295
ELF1	HSC versus Prog	0.629844	0.869148	-0.077384
CIITA	HSC versus Prog	0.630525	0.869148	-0.0327088
SPEN	HSC versus Prog	0.636022	0.874311	-0.0547437
AKT3	HSC versus Prog	0.642409	0.880665	-0.0594526
RFX5	HSC versus Prog	0.647182	0.884657	-0.0466643
CDK4	HSC versus Prog	0.648866	0.884657	0.03666
NCOR2	HSC versus Prog	0.651961	0.884828	-0.0394381
PKN1	HSC versus Prog	0.655101	0.884828	-0.0520099
HES1	HSC versus Prog	0.656257	0.884828	0.0513927
RET	HSC versus Prog	0.65761	0.884828	0.0118421
POU5F1	HSC versus Prog	0.657858	0.884828	-0.0212344
g.secretase	HSC versus Prog	0.663043	0.889405	0.0319689
NfKb.p65.p50	HSC versus Prog	0.670378	0.896832	-0.027504
MAP2K4	HSC versus Prog	0.676034	0.901982	-0.0310846
CDK3	HSC versus Prog	0.68032	0.90351	-0.039303
TGFBR2	HSC versus Prog	0.682507	0.90351	0.0301751
SH3RF1	HSC versus Prog	0.682612	0.90351	0.0341988
BCR.ABL.fusion	HSC versus Prog	0.686883	0.906758	-0.046873
NOTCH1	HSC versus Prog	0.692976	0.912389	-0.0238725
DLK1	HSC versus Prog	0.696115	0.914109	0.0292036
PPARG	HSC versus Prog	0.700295	0.917184	0.0284561
ID2	HSC versus Prog	0.704029	0.917495	0.0421122
TBP	HSC versus Prog	0.70421	0.917495	-0.0611847
BTK	HSC versus Prog	0.710238	0.918349	0.0324149
ROBO1	HSC versus Prog	0.71052	0.918349	0.0424911
MEF2C	HSC versus Prog	0.710654	0.918349	-0.0448916
ELF3	HSC versus Prog	0.712226	0.918349	0.037159
GATA2	HSC versus Prog	0.717079	0.921693	0.0248869
DDB2	HSC versus Prog	0.721307	0.921693	-0.0416646
STAT4	HSC versus Prog	0.722954	0.921693	-0.0271131
PRKD1	HSC versus Prog	0.72345	0.921693	0.0278663
PRKCB	HSC versus Prog	0.725361	0.921693	-0.0401161
E2F1	HSC versus Prog	0.726684	0.921693	-0.0203162
FOXO4	HSC versus Prog	0.72775	0.921693	-0.0224349
CEBPB	HSC versus Prog	0.732543	0.925415	-0.0187799
NFATC2	HSC versus Prog	0.736287	0.927796	-0.0253805
MAPK13	HSC versus Prog	0.745435	0.935771	-0.0354928
CRL4.CRBN.	HSC versus Prog	0.746576	0.935771	0.0475972
ULK1	HSC versus Prog	0.74945	0.935771	0.043454
AKT2	HSC versus Prog	0.750335	0.935771	-0.0251117
SCF.SKP2	HSC versus Prog	0.75227	0.935771	0.0538727
CSNK1E	HSC versus Prog	0.754511	0.935771	-0.0431839
BTRC	HSC versus Prog	0.755743	0.935771	0.0521326
CHUK	HSC versus Prog	0.757819	0.936019	0.0258391
ATF1	HSC versus Prog	0.761308	0.938006	0.0215581
GTF2I	HSC versus Prog	0.774415	0.944436	-0.023103
JAK1	HSC versus Prog	0.775925	0.944436	0.0203569
IKZF1	HSC versus Prog	0.779548	0.944436	0.0207912
FYN	HSC versus Prog	0.782193	0.944436	-0.0207042
MAP2K2	HSC versus Prog	0.783798	0.944436	-0.0266244
PSEN1	HSC versus Prog	0.787075	0.944436	0.0174078
MEK1.2	HSC versus Prog	0.787387	0.944436	-0.0191571
FAS	HSC versus Prog	0.78854	0.944436	0.0206644
MITF	HSC versus Prog	0.788751	0.944436	0.0187417
SFN	HSC versus Prog	0.789415	0.944436	0.0232499
CHEK2	HSC versus Prog	0.792342	0.944436	0.0231621
CREB1	HSC versus Prog	0.795311	0.944436	0.013068
GATA3	HSC versus Prog	0.79686	0.944436	-0.0326908
IFNGR2.INFGR1	HSC versus Prog	0.798072	0.944436	0.0180568
FOXM1	HSC versus Prog	0.79867	0.944436	0.019394
PTK2	HSC versus Prog	0.799655	0.944436	0.0186247
IRAK1	HSC versus Prog	0.800977	0.944436	-0.017942
PIAS1	HSC versus Prog	0.801874	0.944436	0.020677
SOX9	HSC versus Prog	0.804074	0.944436	-0.0304215
AURKA	HSC versus Prog	0.804379	0.944436	0.0185406
MYBL2	HSC versus Prog	0.807939	0.946389	-0.0292271
IKBKB	HSC versus Prog	0.813257	0.950387	0.0220468
EGFR	HSC versus Prog	0.816139	0.951527	0.0138693
PTPN1	HSC versus Prog	0.824504	0.957391	-0.0174128
MTOR	HSC versus Prog	0.825007	0.957391	-0.0153656
PARD6A	HSC versus Prog	0.833242	0.964705	-0.0206803
SMAD3.SMAD4	HSC versus Prog	0.836218	0.96591	-0.0198165
MAPK8	HSC versus Prog	0.838593	0.966415	-0.01418
GNAQ	HSC versus Prog	0.840976	0.966928	-0.0211972
CSNK1A1	HSC versus Prog	0.845186	0.968012	-0.0273329
CASP3	HSC versus Prog	0.845798	0.968012	0.023194
SKI	HSC versus Prog	0.852987	0.971176	-0.0149824
SRY	HSC versus Prog	0.855136	0.971176	-0.0289735
RUNX1	HSC versus Prog	0.856038	0.971176	0.0108367
DVL2	HSC versus Prog	0.857632	0.971176	0.016382
AKT1	HSC versus Prog	0.858294	0.971176	0.00996965
SRF	HSC versus Prog	0.864543	0.97568	0.00944556
NFKB1	HSC versus Prog	0.866371	0.97568	0.0128628
DVL3	HSC versus Prog	0.86814	0.97568	-0.0165921
STAT1	HSC versus Prog	0.871576	0.976416	0.00903303
POLR2A	HSC versus Prog	0.872708	0.976416	-0.0119174
SCF.FBW7	HSC versus Prog	0.877268	0.977394	-0.0263843
DDB1	HSC versus Prog	0.878623	0.977394	0.0216262
PTPN11	HSC versus Prog	0.879459	0.977394	0.0120442
GLI3	HSC versus Prog	0.884089	0.978297	0.0116992
PRMT5	HSC versus Prog	0.887777	0.978297	0.0149698
ITCH	HSC versus Prog	0.887829	0.978297	0.0114076
PTPRR	HSC versus Prog	0.888114	0.978297	0.020757
PRRX1	HSC versus Prog	0.899121	0.979998	-0.0131683
MEIS1	HSC versus Prog	0.899584	0.979998	-0.0204216
CUX1	HSC versus Prog	0.901351	0.979998	0.0186465
LCK	HSC versus Prog	0.901979	0.979998	0.00980359
ERK1.2	HSC versus Prog	0.902243	0.979998	-0.00594015
HRAS	HSC versus Prog	0.902264	0.979998	0.00904829
PTPN6	HSC versus Prog	0.905656	0.979998	-0.0114557
PRKAA1	HSC versus Prog	0.907327	0.979998	-0.00995308
NKX3.1	HSC versus Prog	0.908679	0.979998	0.0138647
STK3	HSC versus Prog	0.912545	0.979998	0.0070785
HDAC5	HSC versus Prog	0.915633	0.979998	0.00778604
CDK5	HSC versus Prog	0.918474	0.979998	-0.00894195
HSF1	HSC versus Prog	0.919939	0.979998	-0.00613242
RIPK1	HSC versus Prog	0.924197	0.979998	-0.00960246
GSK3B	HSC versus Prog	0.924385	0.979998	0.00625588
PAK2	HSC versus Prog	0.924706	0.979998	0.0118227
ROBO	HSC versus Prog	0.924905	0.979998	-0.0136261
PML	HSC versus Prog	0.926995	0.979998	-0.00751772
PPP2R5C	HSC versus Prog	0.928365	0.979998	0.00762708
PAK1	HSC versus Prog	0.929717	0.979998	-0.00633696
SMO	HSC versus Prog	0.93249	0.979998	0.00529263
DDX5	HSC versus Prog	0.934544	0.979998	-0.0093994
PRKCQ	HSC versus Prog	0.936461	0.979998	0.00581452
MKL1	HSC versus Prog	0.936791	0.979998	-0.00611151
TFEB	HSC versus Prog	0.939195	0.980457	-0.00574532
LYN	HSC versus Prog	0.941394	0.980701	0.00752212
AGTR1	HSC versus Prog	0.948314	0.981416	0.00485529
PTPRC	HSC versus Prog	0.948993	0.981416	0.00403752
MAP2K6	HSC versus Prog	0.952355	0.981416	-0.00504774
WT1	HSC versus Prog	0.952629	0.981416	0.00770049
SPAG9	HSC versus Prog	0.953236	0.981416	0.00510438
RARB	HSC versus Prog	0.954431	0.981416	0.00530579
KIF7	HSC versus Prog	0.955848	0.981416	0.00505806
PARD6.SMURF1	HSC versus Prog	0.962129	0.983318	0.00581434
PPP1CA	HSC versus Prog	0.963557	0.983318	-0.00304103
DCX.DET1.COP1	HSC versus Prog	0.964558	0.983318	0.0066557
AKT	HSC versus Prog	0.96726	0.983318	0.00208261
MAPK15	HSC versus Prog	0.969448	0.983318	-0.00432077
CBX3	HSC versus Prog	0.969524	0.983318	-0.00518629
mTORC1	HSC versus Prog	0.978931	0.989301	0.00272599
HNF1A	HSC versus Prog	0.979389	0.989301	-0.00269974
FLT3	HSC versus Prog	0.988184	0.993343	0.00113531
PP2B	HSC versus Prog	0.9904	0.993343	0.000976028
MDM2	HSC versus Prog	0.990929	0.993343	-0.000811482
SCF.betaTRCP	HSC versus Prog	0.991352	0.993343	0.00184969
NR2F6	HSC versus Prog	0.994746	0.994746	0.000700068
PRKCD	Prog versus GMP	2.71285e-09	1.11491e-06	0.522205
FOXO4	Prog versus GMP	4.46858e-09	1.11491e-06	-0.383696
TRIM28	Prog versus GMP	3.81453e-08	6.34483e-06	0.799774
UBTF	Prog versus GMP	1.32639e-06	0.000165467	-0.371694
YY1	Prog versus GMP	4.69124e-06	0.000468186	0.341698
PRKCZ	Prog versus GMP	6.03081e-06	0.000501562	0.563903
PLK1	Prog versus GMP	7.22119e-06	0.000514768	0.634256
RELA	Prog versus GMP	1.02574e-05	0.000639808	0.209779
BCL3	Prog versus GMP	1.18742e-05	0.000658359	0.564924
AKT3	Prog versus GMP	3.23692e-05	0.00161522	0.5354
NOTCH3	Prog versus GMP	6.66599e-05	0.00302394	-0.300567
MYOG	Prog versus GMP	0.000187717	0.0078059	0.376358
NCOA1	Prog versus GMP	0.000207364	0.00795959	-0.308637
PKN1	Prog versus GMP	0.000357789	0.0127526	0.417188
MYC	Prog versus GMP	0.000431651	0.0143596	0.146215
NR2F6	Prog versus GMP	0.000468844	0.0146221	0.373237
MYOD1	Prog versus GMP	0.000557465	0.0163632	0.226356
TRAF2	Prog versus GMP	0.000796959	0.0197197	-0.269702
PBX1	Prog versus GMP	0.000815906	0.0197197	0.437707
PDPK1	Prog versus GMP	0.000828083	0.0197197	0.219654
SMAD4	Prog versus GMP	0.000829885	0.0197197	-0.245848
PRKCB	Prog versus GMP	0.00118895	0.026957	0.371162
ZEB1	Prog versus GMP	0.00124251	0.026957	0.412361
HSF1	Prog versus GMP	0.00142186	0.0290704	0.195149
SGK2	Prog versus GMP	0.00146529	0.0290704	0.383022
TRAF1	Prog versus GMP	0.00151469	0.0290704	-0.242819
NCOR1	Prog versus GMP	0.00170607	0.0315307	-0.251732
FADD	Prog versus GMP	0.00188429	0.0327384	-0.313943
SREBF2	Prog versus GMP	0.00196497	0.0327384	-0.254645
MLL2.complex	Prog versus GMP	0.00205113	0.0327384	-0.368102
STK4	Prog versus GMP	0.00205357	0.0327384	-0.241716
MYOD1.SWI.SNF.complex	Prog versus GMP	0.00209946	0.0327384	0.283295
RFXAP	Prog versus GMP	0.00237453	0.0359057	0.445431
NFE2L2	Prog versus GMP	0.00256634	0.0376649	0.262943
REST	Prog versus GMP	0.00311742	0.0444456	0.506955
POU2F1	Prog versus GMP	0.00328331	0.0455103	-0.297055
PAX7	Prog versus GMP	0.00349375	0.0471184	-0.279949
MAPK1	Prog versus GMP	0.0036808	0.0483347	-0.161689
MAPKAPK2	Prog versus GMP	0.00402878	0.0502966	-0.207034
PPP2R5C	Prog versus GMP	0.00403179	0.0502966	-0.244365
NFY	Prog versus GMP	0.00419605	0.0510689	-0.381095
ATR	Prog versus GMP	0.00479459	0.0560315	0.359698
SUZ12	Prog versus GMP	0.00482836	0.0560315	0.524717
KAT2B	Prog versus GMP	0.0051334	0.0582174	-0.335322
SGK3	Prog versus GMP	0.00606969	0.0673062	0.317359
SETDB1	Prog versus GMP	0.00663297	0.0701739	0.547018
MITF	Prog versus GMP	0.0067413	0.0701739	-0.189732
KMT2A	Prog versus GMP	0.00675019	0.0701739	0.401894
AKT2	Prog versus GMP	0.00704109	0.0717041	0.212906
CAMKK1	Prog versus GMP	0.00761129	0.0759607	-0.299424
CASP8AP2	Prog versus GMP	0.00789081	0.0772062	-0.241597
RFX.complex	Prog versus GMP	0.0091347	0.0874488	0.338875
YAP1	Prog versus GMP	0.00941573	0.0874488	-0.180299
PRKCE	Prog versus GMP	0.00946339	0.0874488	0.220905
SMC3	Prog versus GMP	0.00988807	0.0897117	0.226626
IKBKG	Prog versus GMP	0.010763	0.0947555	0.250798
GATA6	Prog versus GMP	0.0108238	0.0947555	-0.267645
SUZ12.EZH2	Prog versus GMP	0.0113824	0.0973327	0.350946
KMT2D	Prog versus GMP	0.0115083	0.0973327	-0.298987
GNG12	Prog versus GMP	0.0120504	0.0976586	0.195112
SMARCA4	Prog versus GMP	0.0120726	0.0976586	0.220531
NUAK1	Prog versus GMP	0.0121339	0.0976586	-0.204493
FGFR4	Prog versus GMP	0.0124122	0.0983125	-0.166089
FOSL1	Prog versus GMP	0.0156707	0.121774	0.351903
BAD	Prog versus GMP	0.0162412	0.121774	-0.162227
MAP3K7	Prog versus GMP	0.0164568	0.121774	0.210077
TCF4	Prog versus GMP	0.0165312	0.121774	0.197947
GSK3B	Prog versus GMP	0.0165944	0.121774	0.157955
CYLD	Prog versus GMP	0.0171819	0.124258	0.21598
SYK	Prog versus GMP	0.0176821	0.126048	-0.250051
KLF5	Prog versus GMP	0.0198809	0.139726	0.181636
MAPK3	Prog versus GMP	0.0203757	0.141215	-0.118419
GSK3A	Prog versus GMP	0.0227467	0.154114	-0.179682
IRF3	Prog versus GMP	0.0234872	0.154114	-0.179954
ABL1	Prog versus GMP	0.0235588	0.154114	0.184366
PPP3CA	Prog versus GMP	0.023642	0.154114	-0.199148
SH3RF1	Prog versus GMP	0.0237811	0.154114	-0.189063
CDON	Prog versus GMP	0.0241442	0.154461	0.123681
PTPN1	Prog versus GMP	0.0256116	0.161775	0.175258
LTBR	Prog versus GMP	0.0268218	0.167301	-0.179615
SETDB1.NLK.CHD7	Prog versus GMP	0.0272658	0.167971	0.3508
RFXANK	Prog versus GMP	0.0283906	0.170841	0.319652
NFYB	Prog versus GMP	0.0284704	0.170841	-0.320861
USF1	Prog versus GMP	0.0298842	0.170841	0.257085
PRKACA	Prog versus GMP	0.0300252	0.170841	0.216255
LRP6	Prog versus GMP	0.0301815	0.170841	-0.158893
YWHAZ	Prog versus GMP	0.030241	0.170841	-0.144037
CDK3	Prog versus GMP	0.0304491	0.170841	-0.206388
Calcineurin	Prog versus GMP	0.030742	0.170841	-0.234359
TP63	Prog versus GMP	0.0310269	0.170841	-0.166009
PP2B	Prog versus GMP	0.0316931	0.170841	-0.174231
RPS6KA3	Prog versus GMP	0.0321064	0.170841	-0.164478
PRKDC	Prog versus GMP	0.0321337	0.170841	0.330376
BCR.ABL.fusion	Prog versus GMP	0.0321825	0.170841	0.249021
IKZF1	Prog versus GMP	0.0326933	0.171726	-0.158603
EGR1	Prog versus GMP	0.0340769	0.177129	0.121102
NR1H4	Prog versus GMP	0.0357338	0.183826	0.228173
NFKB1	Prog versus GMP	0.0364722	0.18479	0.159831
YWHAB	Prog versus GMP	0.0367737	0.18479	0.156939
SF1	Prog versus GMP	0.0370321	0.18479	0.348407
EP300	Prog versus GMP	0.0376659	0.186092	0.0932945
SP1	Prog versus GMP	0.0385077	0.188386	-0.116146
NFYA	Prog versus GMP	0.0389904	0.188895	-0.23112
MYCN	Prog versus GMP	0.0394499	0.189283	0.232163
RET	Prog versus GMP	0.040269	0.19049	-0.0547709
RFX5	Prog versus GMP	0.0404649	0.19049	0.208799
CUL4A	Prog versus GMP	0.0427752	0.199484	-0.277876
AKT	Prog versus GMP	0.0435232	0.201093	-0.102377
CHD7	Prog versus GMP	0.0443821	0.20318	0.373231
SOX2	Prog versus GMP	0.0449364	0.203848	0.164419
DLX5	Prog versus GMP	0.0454416	0.204256	-0.163845
P300.PCAF	Prog versus GMP	0.0458451	0.204256	-0.235755
FGFR1	Prog versus GMP	0.0474261	0.208334	-0.158406
TYK2	Prog versus GMP	0.0475953	0.208334	-0.163148
TBX3	Prog versus GMP	0.0484145	0.210077	0.181058
SGK1	Prog versus GMP	0.0491875	0.210132	0.194305
CDK6	Prog versus GMP	0.0492695	0.210132	-0.183489
PSENEN	Prog versus GMP	0.0503793	0.213045	-0.192758
CUL3	Prog versus GMP	0.0516219	0.216465	-0.264986
CRTC3	Prog versus GMP	0.0524572	0.217412	0.271815
PDGFRA	Prog versus GMP	0.0530875	0.217412	-0.12136
RPL10	Prog versus GMP	0.0533618	0.217412	0.242945
CTNNB1	Prog versus GMP	0.0537517	0.217412	0.109106
MAP2K2	Prog versus GMP	0.0541228	0.217412	0.186747
RPS6KA2	Prog versus GMP	0.0544619	0.217412	-0.21719
PRKAA2	Prog versus GMP	0.055257	0.218835	0.246515
PIN1	Prog versus GMP	0.0561418	0.218897	0.169269
CyclinD.CDK4	Prog versus GMP	0.0561499	0.218897	0.15856
NLK	Prog versus GMP	0.0571545	0.221086	0.229442
MAP3K14	Prog versus GMP	0.0586304	0.22425	-0.157965
RCOR1	Prog versus GMP	0.0590645	0.22425	0.250313
FYN	Prog versus GMP	0.0593206	0.22425	0.141117
TFDP1	Prog versus GMP	0.0598398	0.224512	-0.156584
SMAD1	Prog versus GMP	0.0631692	0.23039	-0.114504
ADAM17	Prog versus GMP	0.0631879	0.23039	-0.145556
PRKG1	Prog versus GMP	0.0632967	0.23039	0.253494
PPP3CC	Prog versus GMP	0.0636332	0.23039	-0.179597
TCF12	Prog versus GMP	0.0637376	0.23039	0.186233
RYK	Prog versus GMP	0.0641768	0.23039	-0.218208
MAPK14	Prog versus GMP	0.0655279	0.23356	0.121062
MYOD.HEB	Prog versus GMP	0.0676966	0.238381	0.159721
CDK4	Prog versus GMP	0.068272	0.238381	-0.146648
PPP3CB	Prog versus GMP	0.0683135	0.238381	-0.162467
HSP90AB1	Prog versus GMP	0.069363	0.239695	-0.207463
MAP2K1	Prog versus GMP	0.0699786	0.239695	0.136426
PRKCA	Prog versus GMP	0.0706128	0.239695	0.148327
DDB1	Prog versus GMP	0.0709069	0.239695	-0.255529
DDB2	Prog versus GMP	0.071092	0.239695	0.210611
DVL2	Prog versus GMP	0.07196	0.240993	0.164168
PTPN11	Prog versus GMP	0.0733303	0.243946	-0.142087
DLL4	Prog versus GMP	0.0754292	0.249266	-0.12778
TBK1	Prog versus GMP	0.0766762	0.250443	-0.200391
PRC2	Prog versus GMP	0.0769579	0.250443	0.248632
APP	Prog versus GMP	0.0772912	0.250443	-0.136347
FLI1	Prog versus GMP	0.0780044	0.251124	0.121749
NAE	Prog versus GMP	0.0796663	0.253	-0.215672
MAF	Prog versus GMP	0.0800538	0.253	-0.141558
MLL1.complex	Prog versus GMP	0.0801083	0.253	-0.190843
AMPK	Prog versus GMP	0.0809747	0.254128	-0.167841
AURKB	Prog versus GMP	0.081597	0.254481	0.210534
EED	Prog versus GMP	0.0823926	0.255366	0.296069
TFCP2	Prog versus GMP	0.0847658	0.259711	-0.131789
PRKCI	Prog versus GMP	0.0848353	0.259711	-0.197815
MAFK	Prog versus GMP	0.0877076	0.266867	-0.236951
MKL1	Prog versus GMP	0.0899015	0.271884	-0.130553
FRS2	Prog versus GMP	0.0914155	0.274433	-0.142428
PLCG1	Prog versus GMP	0.0921603	0.274433	-0.129598
TLR4	Prog versus GMP	0.0923944	0.274433	-0.137144
CDK5	Prog versus GMP	0.0943304	0.278526	0.145988
ELF3	Prog versus GMP	0.0976142	0.285943	-0.166671
IKK.complex	Prog versus GMP	0.0979883	0.285943	-0.12272
DDX5	Prog versus GMP	0.0990026	0.287223	0.188583
RBPJ	Prog versus GMP	0.100932	0.291128	-0.135759
RPS6KA5	Prog versus GMP	0.103198	0.295953	-0.118507
TICAM1	Prog versus GMP	0.106241	0.301787	-0.139177
NR3C1	Prog versus GMP	0.106442	0.301787	-0.0869551
BMPR1A	Prog versus GMP	0.108259	0.30469	-0.176354
SOX9	Prog versus GMP	0.108687	0.30469	0.19646
CXCL1	Prog versus GMP	0.113228	0.315646	0.152643
CyclinB.CDK1	Prog versus GMP	0.115335	0.319735	-0.140867
DAB1	Prog versus GMP	0.117065	0.322683	-0.185836
NOTCH1	Prog versus GMP	0.117692	0.322683	-0.0944676
CyclinE.CDK2	Prog versus GMP	0.118358	0.322736	-0.191377
CRL4.CRBN.	Prog versus GMP	0.119648	0.32276	-0.228903
WWTR1	Prog versus GMP	0.120051	0.32276	0.142286
SIRT2	Prog versus GMP	0.120307	0.32276	-0.216967
NCK1	Prog versus GMP	0.123826	0.32729	-0.155853
STAT5A	Prog versus GMP	0.124036	0.32729	0.0860595
CDKN1A	Prog versus GMP	0.124055	0.32729	-0.0983789
TNFRSF1B	Prog versus GMP	0.12462	0.32729	-0.133574
MTOR	Prog versus GMP	0.125922	0.328575	-0.106204
PPP2CB	Prog versus GMP	0.12699	0.328575	0.193928
BRCA1	Prog versus GMP	0.127718	0.328575	-0.107597
CSNK2A1	Prog versus GMP	0.128016	0.328575	0.0971205
SUFU	Prog versus GMP	0.129376	0.328575	-0.137376
FAS	Prog versus GMP	0.129576	0.328575	-0.11662
NAE1	Prog versus GMP	0.129718	0.328575	-0.154763
NUMB	Prog versus GMP	0.132091	0.330199	-0.133966
FOXO3	Prog versus GMP	0.132127	0.330199	-0.109538
MAPK7	Prog versus GMP	0.132587	0.330199	0.27732
RUNX2	Prog versus GMP	0.133447	0.330199	-0.106114
MEF2A	Prog versus GMP	0.133668	0.330199	0.104265
STAT6	Prog versus GMP	0.136932	0.336595	-0.101433
NR4A2	Prog versus GMP	0.145333	0.355497	-0.191258
PDX1	Prog versus GMP	0.146211	0.355899	0.257829
IKBKE	Prog versus GMP	0.147066	0.356241	-0.212795
PRRX1	Prog versus GMP	0.149439	0.360243	-0.149511
DCX.DET1.COP1	Prog versus GMP	0.150848	0.361889	-0.214853
NOTCH2	Prog versus GMP	0.155715	0.371778	-0.0988558
TEAD4	Prog versus GMP	0.157056	0.372666	-0.134212
CALM1	Prog versus GMP	0.15758	0.372666	-0.115905
MET	Prog versus GMP	0.158658	0.373445	-0.115277
CIITA	Prog versus GMP	0.161126	0.377473	0.0951336
JUND	Prog versus GMP	0.163926	0.382238	0.0783967
p38	Prog versus GMP	0.165786	0.384777	0.183314
RPS6KB1	Prog versus GMP	0.169552	0.391456	-0.103201
KRAS	Prog versus GMP	0.170233	0.391456	-0.172981
ROBO	Prog versus GMP	0.174066	0.398436	0.196181
REL	Prog versus GMP	0.176894	0.403061	-0.190613
PHB2	Prog versus GMP	0.178145	0.403572	-0.113255
ERCC6	Prog versus GMP	0.178736	0.403572	0.147119
ULK1.Atg13.Fip200	Prog versus GMP	0.180791	0.405238	-0.170889
KDM1A	Prog versus GMP	0.181098	0.405238	0.165153
TCF3	Prog versus GMP	0.185975	0.414293	-0.0496746
CHEK2	Prog versus GMP	0.188107	0.414854	0.115599
STK11	Prog versus GMP	0.188867	0.414854	-0.0942006
FBXW7	Prog versus GMP	0.189536	0.414854	0.146554
HDAC6	Prog versus GMP	0.189553	0.414854	-0.104863
Myog.SWI.SNF.complex	Prog versus GMP	0.197606	0.428726	0.191368
RASA1	Prog versus GMP	0.197609	0.428726	-0.129977
TEAD1	Prog versus GMP	0.202387	0.437192	-0.121756
MAPK15	Prog versus GMP	0.209286	0.448455	0.141391
ULK1	Prog versus GMP	0.209399	0.448455	-0.170483
HIF1A	Prog versus GMP	0.211256	0.450499	-0.0875383
PTPN2	Prog versus GMP	0.212939	0.452155	-0.111754
TAL1	Prog versus GMP	0.216945	0.45871	-0.077074
ESR1	Prog versus GMP	0.22152	0.464152	-0.0691268
IKBKB	Prog versus GMP	0.221852	0.464152	0.113805
KLF4	Prog versus GMP	0.222309	0.464152	0.10065
MAP2K3	Prog versus GMP	0.226271	0.468764	-0.103115
MEF2C	Prog versus GMP	0.227161	0.468764	0.145869
g.secretase	Prog versus GMP	0.227932	0.468764	-0.0882954
IL4R	Prog versus GMP	0.228276	0.468764	-0.0795902
CUL1	Prog versus GMP	0.234507	0.476944	-0.174124
NR2F2	Prog versus GMP	0.23472	0.476944	0.168734
MAP3K11	Prog versus GMP	0.235152	0.476944	-0.0980168
RUNX3	Prog versus GMP	0.236083	0.476944	0.121409
SKIL	Prog versus GMP	0.24035	0.479752	-0.170268
HSF2	Prog versus GMP	0.240535	0.479752	-0.173746
HMT	Prog versus GMP	0.241098	0.479752	-0.162089
ROBO1	Prog versus GMP	0.242726	0.479752	0.133481
CSNK1D	Prog versus GMP	0.243574	0.479752	-0.104446
FOXA2	Prog versus GMP	0.243894	0.479752	0.158762
ERBB2	Prog versus GMP	0.244815	0.479752	-0.0675598
NR4A1	Prog versus GMP	0.245164	0.479752	-0.0901094
SMAD5	Prog versus GMP	0.246258	0.479752	-0.157472
SMARCD3	Prog versus GMP	0.247087	0.479752	0.131311
STAT3	Prog versus GMP	0.250509	0.484512	0.0345891
CASP8	Prog versus GMP	0.253688	0.487354	-0.0843264
POLR2A	Prog versus GMP	0.254256	0.487354	-0.0846397
BTK	Prog versus GMP	0.254908	0.487354	0.0991352
ATM	Prog versus GMP	0.258046	0.491469	0.10501
E2F3	Prog versus GMP	0.261544	0.496237	0.116995
PPP1R15A	Prog versus GMP	0.267999	0.506559	0.135419
KAT5	Prog versus GMP	0.278171	0.523802	-0.14615
BCAR1	Prog versus GMP	0.282394	0.529755	-0.0846499
NfKb.p65.p50	Prog versus GMP	0.28628	0.535034	0.068763
TP53RK	Prog versus GMP	0.295062	0.549389	-0.0837735
FOXP3	Prog versus GMP	0.298727	0.554145	-0.109867
CSNK2B	Prog versus GMP	0.300378	0.554416	-0.143528
PML	Prog versus GMP	0.301455	0.554416	-0.0846109
MAP2K4	Prog versus GMP	0.302207	0.554416	0.0765846
IFNGR2.INFGR1	Prog versus GMP	0.30549	0.558386	-0.0721753
PPP1CC	Prog versus GMP	0.311738	0.564725	0.154408
PAK2	Prog versus GMP	0.313032	0.564725	-0.125952
PSEN1	Prog versus GMP	0.31348	0.564725	-0.0648248
CDK1	Prog versus GMP	0.314623	0.564725	-0.0925145
NPM1	Prog versus GMP	0.315242	0.564725	-0.0968705
VAV1	Prog versus GMP	0.31608	0.564725	-0.105214
DLL3	Prog versus GMP	0.317024	0.564725	-0.0790313
IL1R1	Prog versus GMP	0.319955	0.564725	0.0370242
MSX1	Prog versus GMP	0.320231	0.564725	-0.119977
ERK1.2	Prog versus GMP	0.320794	0.564725	-0.0479159
HOXA9	Prog versus GMP	0.321407	0.564725	-0.129523
TBP	Prog versus GMP	0.32785	0.572351	0.157355
PARD6.SMURF1	Prog versus GMP	0.328041	0.572351	-0.119522
KIT	Prog versus GMP	0.332808	0.578645	-0.0755667
SFN	Prog versus GMP	0.336983	0.583173	-0.0834091
BORA	Prog versus GMP	0.338439	0.583173	-0.0769829
ITCH	Prog versus GMP	0.338918	0.583173	0.0771802
RIPK1	Prog versus GMP	0.346618	0.593746	-0.0947845
DLK1	Prog versus GMP	0.347443	0.593746	-0.0701
CDC25A	Prog versus GMP	0.350278	0.59623	-0.125757
X14.3.3	Prog versus GMP	0.354105	0.59623	-0.0695156
RANBP9	Prog versus GMP	0.354574	0.59623	-0.0947774
MAP3K1	Prog versus GMP	0.35484	0.59623	-0.0841923
NR2F1	Prog versus GMP	0.355322	0.59623	0.126618
RNF111	Prog versus GMP	0.356065	0.59623	-0.108691
HRAS	Prog versus GMP	0.362471	0.604926	-0.0669569
NFATC2	Prog versus GMP	0.364809	0.606799	-0.0681483
RARG	Prog versus GMP	0.36626	0.606954	-0.0855465
GTF2I	Prog versus GMP	0.367335	0.606954	-0.0725093
CDX2	Prog versus GMP	0.368609	0.607048	-0.0595757
NFATC1	Prog versus GMP	0.370196	0.607657	-0.0650153
TRAF6	Prog versus GMP	0.374101	0.610922	-0.0882578
MAP3K5	Prog versus GMP	0.374634	0.610922	-0.0685285
ZNF217	Prog versus GMP	0.384421	0.622818	0.106628
MYD88	Prog versus GMP	0.384425	0.622818	-0.0579609
JAK2	Prog versus GMP	0.387267	0.624822	0.0596038
EWSR1	Prog versus GMP	0.388166	0.624822	-0.0607389
JAK3	Prog versus GMP	0.405012	0.646594	-0.0766804
VDR	Prog versus GMP	0.405426	0.646594	0.0858131
SDC4	Prog versus GMP	0.405579	0.646594	0.0987372
EGFR	Prog versus GMP	0.407625	0.646773	-0.0492848
CEBPA	Prog versus GMP	0.408283	0.646773	-0.0638492
RUNX1	Prog versus GMP	0.413735	0.652379	-0.0487132
PRDM1	Prog versus GMP	0.414985	0.652379	0.0939798
CBX3	Prog versus GMP	0.415744	0.652379	0.110231
ATF2	Prog versus GMP	0.417153	0.652537	-0.0607598
MAPK11	Prog versus GMP	0.421365	0.65608	0.0737649
SRC	Prog versus GMP	0.423492	0.65608	-0.0601279
NOS1	Prog versus GMP	0.424529	0.65608	0.10908
ELK1	Prog versus GMP	0.425122	0.65608	0.0419707
MYOCD	Prog versus GMP	0.425992	0.65608	0.0925463
PTPN6	Prog versus GMP	0.429371	0.656117	-0.076214
SREBF1	Prog versus GMP	0.429797	0.656117	0.0553977
GNA13	Prog versus GMP	0.42996	0.656117	0.0791224
MEK1.2	Prog versus GMP	0.433643	0.656626	0.0554884
ROCK1	Prog versus GMP	0.437886	0.656626	-0.0794438
TFEB	Prog versus GMP	0.439572	0.656626	-0.0580835
RXRB	Prog versus GMP	0.439626	0.656626	-0.0853353
POU5F1	Prog versus GMP	0.44233	0.656626	-0.0367497
TNFRSF13C	Prog versus GMP	0.442553	0.656626	-0.0600534
MAFF	Prog versus GMP	0.444192	0.656626	-0.100158
STAT4	Prog versus GMP	0.444891	0.656626	-0.0582925
PKCtheta.Nfix	Prog versus GMP	0.44502	0.656626	-0.0773951
MAPK12	Prog versus GMP	0.447094	0.656626	-0.0695937
MYB	Prog versus GMP	0.44874	0.656626	-0.0514637
GATA1	Prog versus GMP	0.449384	0.656626	0.059744
PRKAA1	Prog versus GMP	0.449589	0.656626	-0.0645004
MEIS1	Prog versus GMP	0.450981	0.656626	-0.121713
TFAP2A	Prog versus GMP	0.451145	0.656626	-0.0631891
LYN	Prog versus GMP	0.451348	0.656626	0.0768879
CRX	Prog versus GMP	0.456188	0.661739	-0.0645757
PTPRR	Prog versus GMP	0.459629	0.664797	0.108848
MAPK8	Prog versus GMP	0.466408	0.671638	0.0505864
PTEN	Prog versus GMP	0.467051	0.671638	-0.0509267
TRAF3	Prog versus GMP	0.469949	0.673864	-0.0717707
NEDD4L	Prog versus GMP	0.475913	0.68046	0.0651627
LATS1	Prog versus GMP	0.477791	0.681193	-0.0690035
AGTR1	Prog versus GMP	0.493009	0.70067	0.0512278
SKI	Prog versus GMP	0.49426	0.70067	-0.0551371
MAPK9	Prog versus GMP	0.501222	0.707486	0.0446725
PTCRA	Prog versus GMP	0.501904	0.707486	0.0519507
PRKCQ	Prog versus GMP	0.507205	0.712945	0.0482602
E2F1	Prog versus GMP	0.517582	0.725487	0.0375198
BMI1	Prog versus GMP	0.522618	0.730494	-0.0501525
ID2	Prog versus GMP	0.525125	0.731948	-0.0702743
MXI1	Prog versus GMP	0.531473	0.738732	0.0672414
MDM2	Prog versus GMP	0.533709	0.73978	-0.0443176
PPM1A	Prog versus GMP	0.536479	0.74156	0.0602056
ID3	Prog versus GMP	0.539739	0.743926	-0.0797481
STAT1	Prog versus GMP	0.541172	0.743926	-0.0340629
GLI3	Prog versus GMP	0.544161	0.745979	-0.0485583
SCF.SKP2	Prog versus GMP	0.549296	0.750587	-0.101955
SPEN	Prog versus GMP	0.550531	0.750587	0.0688811
TGFBR1	Prog versus GMP	0.552638	0.751408	-0.0423636
SRY	Prog versus GMP	0.55435	0.751687	0.0936078
TLRs	Prog versus GMP	0.565767	0.762999	-0.0472807
SKP2	Prog versus GMP	0.569367	0.762999	-0.0775847
PAX6	Prog versus GMP	0.569704	0.762999	0.0582793
CREBBP	Prog versus GMP	0.56989	0.762999	0.0416026
IL10RA	Prog versus GMP	0.570752	0.762999	0.0390657
PRKD1	Prog versus GMP	0.571867	0.762999	-0.0444096
MEF2D	Prog versus GMP	0.573809	0.763548	0.067416
SMAD3	Prog versus GMP	0.580484	0.767476	0.0446727
MAZ	Prog versus GMP	0.580681	0.767476	0.0392343
TCF7L2	Prog versus GMP	0.581374	0.767476	-0.0481366
IRAK1	Prog versus GMP	0.583348	0.768049	0.0389449
RHOA	Prog versus GMP	0.587266	0.771173	-0.0515829
mTORC1	Prog versus GMP	0.589078	0.771522	-0.0556247
CREB1	Prog versus GMP	0.599175	0.780124	0.0264113
CAMK1	Prog versus GMP	0.601407	0.780124	-0.0504316
HDAC1	Prog versus GMP	0.603384	0.780124	-0.0414807
LAT	Prog versus GMP	0.604457	0.780124	-0.0416871
CEBPB	Prog versus GMP	0.606034	0.780124	0.0282718
SPAG9	Prog versus GMP	0.606439	0.780124	0.0447325
AHR	Prog versus GMP	0.60659	0.780124	0.0755883
INCENP	Prog versus GMP	0.609695	0.780806	0.0706237
JAG1	Prog versus GMP	0.611461	0.780806	-0.0372243
PPARD	Prog versus GMP	0.611814	0.780806	0.0539255
RBBP5	Prog versus GMP	0.622121	0.791934	-0.0696342
MAP2K6	Prog versus GMP	0.624575	0.793035	0.0412433
SMO	Prog versus GMP	0.62916	0.79683	0.0300979
SRF	Prog versus GMP	0.631167	0.797347	0.0265168
GLI1	Prog versus GMP	0.644649	0.807135	-0.0343845
KLF1	Prog versus GMP	0.648792	0.807135	0.0472665
NCOA3	Prog versus GMP	0.649743	0.807135	-0.0321993
CHEK1	Prog versus GMP	0.650672	0.807135	0.0376178
IGF1R	Prog versus GMP	0.653097	0.807135	0.0334284
TP53	Prog versus GMP	0.65398	0.807135	0.0273144
MLL.SET.subcomplex	Prog versus GMP	0.654962	0.807135	-0.0572839
KIF7	Prog versus GMP	0.655282	0.807135	-0.0406867
PAX3	Prog versus GMP	0.656743	0.807135	0.0520752
SMAD2	Prog versus GMP	0.657608	0.807135	0.0282618
TGFBR2	Prog versus GMP	0.662383	0.807135	-0.0321283
EZH2	Prog versus GMP	0.662782	0.807135	0.0215115
AHR.ARNT	Prog versus GMP	0.663934	0.807135	0.05611
RARB	Prog versus GMP	0.665653	0.807135	-0.0400247
HDAC5	Prog versus GMP	0.667584	0.807135	-0.0314873
JNK	Prog versus GMP	0.668581	0.807135	-0.0331967
CSNK1A1	Prog versus GMP	0.669185	0.807135	-0.0596608
ERBB4	Prog versus GMP	0.669324	0.807135	-0.0372308
LCK	Prog versus GMP	0.670011	0.807135	0.0338365
ASH2L	Prog versus GMP	0.672364	0.807135	-0.0586969
MAPK13	Prog versus GMP	0.675591	0.807135	-0.0456351
ILF3	Prog versus GMP	0.675708	0.807135	-0.0310952
PAK1	Prog versus GMP	0.676117	0.807135	-0.0299417
FLT3	Prog versus GMP	0.683358	0.811954	-0.0311926
LEF1	Prog versus GMP	0.683408	0.811954	0.0310399
ZFYVE9	Prog versus GMP	0.696799	0.825897	-0.0391049
AR	Prog versus GMP	0.699617	0.826138	-0.0252368
PRMT5	Prog versus GMP	0.700313	0.826138	-0.0407288
GATA2	Prog versus GMP	0.71013	0.835743	-0.0254619
JAK1	Prog versus GMP	0.716032	0.840706	-0.0259511
DYRK1B	Prog versus GMP	0.719651	0.842971	-0.0460932
BTRC	Prog versus GMP	0.724088	0.846183	-0.0590091
RXRA	Prog versus GMP	0.72745	0.848125	0.0231391
CDK7	Prog versus GMP	0.733036	0.852068	-0.0399892
SCF.betaTRCP	Prog versus GMP	0.735035	0.852068	-0.057611
ETS1	Prog versus GMP	0.735955	0.852068	-0.0421679
HES1	Prog versus GMP	0.740963	0.855881	0.0380721
CoREST.HDAC.complex	Prog versus GMP	0.745629	0.858483	0.0290344
MAP3K10	Prog versus GMP	0.746657	0.858483	-0.0329048
PTPRC	Prog versus GMP	0.753377	0.863906	0.0197803
PIAS1	Prog versus GMP	0.755041	0.863906	-0.0256451
FOXM1	Prog versus GMP	0.756567	0.863906	-0.0235105
HNF1A	Prog versus GMP	0.771445	0.878884	0.030279
MYBL2	Prog versus GMP	0.773462	0.879174	0.0345217
JAG2	Prog versus GMP	0.785532	0.890865	0.01884
WT1	Prog versus GMP	0.799127	0.904227	0.0329041
CUX1	Prog versus GMP	0.802868	0.906405	-0.0374582
NKX3.1	Prog versus GMP	0.819145	0.920632	0.0275672
CCND1	Prog versus GMP	0.820719	0.920632	-0.0172018
AKT1	Prog versus GMP	0.821005	0.920632	-0.0126015
MAFA	Prog versus GMP	0.826763	0.923397	0.01541
CASP3	Prog versus GMP	0.827172	0.923397	0.0259721
FHL2	Prog versus GMP	0.832229	0.923974	-0.0262941
SIRT1	Prog versus GMP	0.83457	0.923974	0.0150273
CDK2	Prog versus GMP	0.835042	0.923974	-0.0151803
DVL3	Prog versus GMP	0.836835	0.923974	-0.0205299
SCF.FBW7	Prog versus GMP	0.837422	0.923974	-0.0349676
GATA3	Prog versus GMP	0.838798	0.923974	0.0257694
NCOR2	Prog versus GMP	0.844793	0.928528	-0.0170726
PPP1CA	Prog versus GMP	0.854937	0.937612	-0.0121376
STK3	Prog versus GMP	0.858115	0.93778	0.0114928
PPP2CA	Prog versus GMP	0.858849	0.93778	-0.0231221
INSR	Prog versus GMP	0.861513	0.937827	-0.0111715
JUN	Prog versus GMP	0.864498	0.937827	-0.00806903
HDAC2	Prog versus GMP	0.86453	0.937827	0.0140589
SIK1	Prog versus GMP	0.867686	0.939209	-0.0171393
APEX1	Prog versus GMP	0.875989	0.946144	-0.0140853
RPS6KA4	Prog versus GMP	0.878605	0.946919	-0.0118086
CSNK1E	Prog versus GMP	0.887432	0.950997	0.0194985
MAPK8IP1	Prog versus GMP	0.887785	0.950997	0.0129963
GSK3B.Axin.APC	Prog versus GMP	0.888106	0.950997	-0.0109068
GABARAP	Prog versus GMP	0.901731	0.962505	0.00942501
AURKA	Prog versus GMP	0.903345	0.962505	-0.00906695
TJP2	Prog versus GMP	0.904639	0.962505	-0.0084809
STAT5B	Prog versus GMP	0.908185	0.964221	-0.00891098
ATF1	Prog versus GMP	0.913504	0.967258	-0.00768883
PIK3CA	Prog versus GMP	0.918049	0.967258	-0.00823421
HTT	Prog versus GMP	0.918327	0.967258	-0.00799416
SET	Prog versus GMP	0.918798	0.967258	0.00920756
PARD6A	Prog versus GMP	0.928704	0.971743	0.00876602
CAMKK2	Prog versus GMP	0.930324	0.971743	0.00671913
NFKBIA	Prog versus GMP	0.931555	0.971743	-0.00641364
KHSRP	Prog versus GMP	0.934173	0.971743	-0.0104082
CEBPD	Prog versus GMP	0.936474	0.971743	-0.0108969
MAPK10	Prog versus GMP	0.938092	0.971743	-0.0055633
AXIN1	Prog versus GMP	0.938428	0.971743	-0.00653808
SMAD3.SMAD4	Prog versus GMP	0.938638	0.971743	0.00736027
ARNT	Prog versus GMP	0.946331	0.976158	0.00651558
FOS	Prog versus GMP	0.947968	0.976158	-0.00451122
PTK2	Prog versus GMP	0.950102	0.976158	0.00458054
LRP5	Prog versus GMP	0.951751	0.976158	-0.0045587
HNF4A	Prog versus GMP	0.953427	0.976158	-0.00457083
ELF1	Prog versus GMP	0.954646	0.976158	0.00910761
MAX	Prog versus GMP	0.957548	0.976158	-0.0039514
GNAQ	Prog versus GMP	0.958552	0.976158	0.00547637
RANBP3	Prog versus GMP	0.964856	0.980577	0.00372916
LATS2	Prog versus GMP	0.966833	0.980589	-0.00313511
NR1H3	Prog versus GMP	0.970733	0.982547	0.00371514
CHUK	Prog versus GMP	0.979767	0.989684	0.00211968
HSP90AA1	Prog versus GMP	0.985814	0.990003	0.00240342
PPARG	Prog versus GMP	0.98634	0.990003	0.00126244
STAT2	Prog versus GMP	0.987715	0.990003	-0.00149794
CDKN2A	Prog versus GMP	0.988019	0.990003	0.00177798
IL6ST	Prog versus GMP	0.996877	0.996877	0.000279781
MYC	GMP versus Mono	1.79918e-19	8.97789e-17	-0.389401
EGR1	GMP versus Mono	8.89682e-12	2.21976e-09	-0.399391
YY1	GMP versus Mono	3.468e-11	5.76844e-09	-0.501585
PPARG	GMP versus Mono	4.17521e-08	5.20858e-06	-0.411567
TRIM28	GMP versus Mono	1.65369e-07	1.47915e-05	-0.762117
PRKCD	GMP versus Mono	1.77854e-07	1.47915e-05	-0.457647
FOXO4	GMP versus Mono	2.68193e-07	1.91183e-05	0.336006
GATA1	GMP versus Mono	4.35914e-07	2.71901e-05	-0.405169
FLI1	GMP versus Mono	1.10672e-06	6.13616e-05	-0.340952
GSK3B	GMP versus Mono	2.57102e-06	0.00012762	-0.313444
NOTCH3	GMP versus Mono	2.88244e-06	0.00012762	0.354633
CSNK2A1	GMP versus Mono	3.06902e-06	0.00012762	-0.301477
TRAF2	GMP versus Mono	1.02262e-05	0.00039253	0.357213
EP300	GMP versus Mono	1.17455e-05	0.00041429	-0.198698
DLL4	GMP versus Mono	1.24536e-05	0.00041429	0.317406
DLL3	GMP versus Mono	1.49682e-05	0.00046682	0.345904
NFE2L2	GMP versus Mono	3.60336e-05	0.00105769	-0.362653
SMARCA4	GMP versus Mono	7.0515e-05	0.00195483	0.351786
PIN1	GMP versus Mono	8.30283e-05	0.00211739	-0.351779
PTPN11	GMP versus Mono	8.48654e-05	0.00211739	0.31458
HSF1	GMP versus Mono	0.000114527	0.00272138	-0.23714
LRP6	GMP versus Mono	0.000123909	0.00281048	0.2835
PLK1	GMP versus Mono	0.000140824	0.00305527	-0.537914
FBXW7	GMP versus Mono	0.000168077	0.00349287	-0.424056
TRAF1	GMP versus Mono	0.000174993	0.00349287	0.288599
FRS2	GMP versus Mono	0.000191728	0.0036797	0.317277
MAPK14	GMP versus Mono	0.000223947	0.00413886	-0.244471
MYOD.HEB	GMP versus Mono	0.00029279	0.00521794	0.318989
CEBPB	GMP versus Mono	0.00032028	0.00551102	-0.199028
NfKb.p65.p50	GMP versus Mono	0.000400887	0.00666809	-0.230155
PP2B	GMP versus Mono	0.000453489	0.0071079	0.286252
IL10RA	GMP versus Mono	0.000455817	0.0071079	0.243633
FGFR1	GMP versus Mono	0.00054276	0.00820719	0.278197
MYOD1	GMP versus Mono	0.000597736	0.00877265	0.225677
ELK1	GMP versus Mono	0.000702663	0.010018	-0.179755
ZEB1	GMP versus Mono	0.000824293	0.0113104	0.428373
p38	GMP versus Mono	0.000838645	0.0113104	-0.444956
NR2F6	GMP versus Mono	0.000917162	0.0120438	-0.354369
NFKBIA	GMP versus Mono	0.000957625	0.0122527	0.248622
SUZ12.EZH2	GMP versus Mono	0.00102833	0.0128284	-0.45739
GATA2	GMP versus Mono	0.00108993	0.0132653	-0.22552
JAK1	GMP versus Mono	0.00118056	0.0140262	0.233206
GLI1	GMP versus Mono	0.00122668	0.0142352	0.24287
CALM1	GMP versus Mono	0.00137414	0.015584	0.264213
SUZ12	GMP versus Mono	0.00148341	0.0164494	-0.593833
TNFRSF13C	GMP versus Mono	0.00173733	0.0188463	0.246698
FLT3	GMP versus Mono	0.00184916	0.0196326	0.239858
YWHAB	GMP versus Mono	0.00195635	0.0203378	-0.233943
STAT2	GMP versus Mono	0.00199834	0.0203504	0.302881
KIT	GMP versus Mono	0.00208749	0.0208332	0.24178
HSP90AB1	GMP versus Mono	0.0021494	0.0210295	0.352557
RARG	GMP versus Mono	0.00219146	0.0210295	0.292015
NPM1	GMP versus Mono	0.00239895	0.0225863	-0.294794
PDGFRA	GMP versus Mono	0.00252601	0.0233422	0.190501
KLF5	GMP versus Mono	0.00312881	0.0283868	-0.231456
PRKCB	GMP versus Mono	0.0032008	0.0285214	-0.338075
ATF2	GMP versus Mono	0.00326666	0.0285976	-0.221729
ERBB2	GMP versus Mono	0.00347599	0.0291696	0.170799
DAB1	GMP versus Mono	0.00348179	0.0291696	0.348396
PPP3CC	GMP versus Mono	0.00350736	0.0291696	0.284137
RXRB	GMP versus Mono	0.00373014	0.0305138	0.32232
PRKCI	GMP versus Mono	0.00390128	0.031399	0.333031
PRC2	GMP versus Mono	0.00428517	0.0339413	-0.403598
GTF2I	GMP versus Mono	0.00468361	0.0365175	0.228879
TNFRSF1B	GMP versus Mono	0.00513835	0.0394467	0.24469
EED	GMP versus Mono	0.00522539	0.0395071	-0.478407
PPARD	GMP versus Mono	0.00539122	0.0401525	0.297566
PPP3CA	GMP versus Mono	0.00558398	0.0404959	0.244825
ERK1.2	GMP versus Mono	0.00565377	0.0404959	-0.134345
PRKAA1	GMP versus Mono	0.00568078	0.0404959	-0.237379
IFNGR2.INFGR1	GMP versus Mono	0.00581094	0.0407731	0.195416
CREB1	GMP versus Mono	0.00588309	0.0407731	-0.13927
LTBR	GMP versus Mono	0.00610947	0.041762	0.22329
PRKCZ	GMP versus Mono	0.00670882	0.0452392	-0.336427
POU5F1	GMP versus Mono	0.00794296	0.0528471	-0.127717
MYOD1.SWI.SNF.complex	GMP versus Mono	0.00815536	0.0535464	0.243986
PLCG1	GMP versus Mono	0.00908047	0.0588461	0.201688
JUN	GMP versus Mono	0.0115683	0.0740073	-0.120083
RXRA	GMP versus Mono	0.0119186	0.0752835	0.167898
PBX1	GMP versus Mono	0.0122451	0.0763787	0.327576
E2F1	GMP versus Mono	0.0127557	0.0776535	-0.145201
FGFR4	GMP versus Mono	0.0127607	0.0776535	0.165854
MAPK9	GMP versus Mono	0.01313	0.0789381	-0.165635
PDPK1	GMP versus Mono	0.0135324	0.0799976	-0.16224
APP	GMP versus Mono	0.0137455	0.0799976	0.190927
IL6ST	GMP versus Mono	0.0137872	0.0799976	0.177012
TGFBR1	GMP versus Mono	0.0141858	0.0811562	0.175917
NOTCH2	GMP versus Mono	0.0143121	0.0811562	0.171338
g.secretase	GMP versus Mono	0.014672	0.082237	0.179576
FAS	GMP versus Mono	0.0148323	0.082237	0.188278
NFATC1	GMP versus Mono	0.01555	0.0848838	-0.176426
IRF3	GMP versus Mono	0.01573	0.0848838	-0.192402
EGFR	GMP versus Mono	0.01582	0.0848838	0.144357
E2F3	GMP versus Mono	0.0174376	0.0902596	-0.248912
PSEN1	GMP versus Mono	0.0174669	0.0902596	0.153605
KIF7	GMP versus Mono	0.0175159	0.0902596	0.217663
TBX3	GMP versus Mono	0.0176078	0.0902596	-0.218504
INSR	GMP versus Mono	0.0177263	0.0902596	0.152672
MAP3K11	GMP versus Mono	0.0182044	0.0917574	-0.195874
DVL2	GMP versus Mono	0.0193269	0.0964413	-0.214202
PRKCE	GMP versus Mono	0.0197053	0.0968621	-0.198896
AKT3	GMP versus Mono	0.0197995	0.0968621	-0.299134
SOX2	GMP versus Mono	0.020157	0.0976537	-0.191126
SMO	GMP versus Mono	0.0209885	0.100704	0.1446
EZH2	GMP versus Mono	0.0213149	0.101296	-0.114159
PRRX1	GMP versus Mono	0.0225717	0.106257	0.237517
SRY	GMP versus Mono	0.0229856	0.107195	0.361767
ZNF217	GMP versus Mono	0.0251102	0.116018	-0.275863
SUFU	GMP versus Mono	0.0260803	0.119395	0.202334
MAP3K14	GMP versus Mono	0.0265235	0.119786	0.185922
NCK1	GMP versus Mono	0.0266458	0.119786	0.225354
CAMKK1	GMP versus Mono	0.0285664	0.127274	0.245972
ELF1	GMP versus Mono	0.0292523	0.129176	0.350846
TCF3	GMP versus Mono	0.0299437	0.130189	-0.0818645
HSP90AA1	GMP versus Mono	0.0300034	0.130189	0.294768
CIITA	GMP versus Mono	0.0318762	0.137123	0.146255
AURKB	GMP versus Mono	0.0323463	0.137956	-0.259586
SGK2	GMP versus Mono	0.0341426	0.144383	-0.254956
PKN1	GMP versus Mono	0.0366407	0.153645	-0.243832
MYCN	GMP versus Mono	0.037445	0.155709	-0.235186
TICAM1	GMP versus Mono	0.0381909	0.156839	0.179201
TJP2	GMP versus Mono	0.0383689	0.156839	0.147291
STAT5A	GMP versus Mono	0.0386598	0.156839	0.116107
ADAM17	GMP versus Mono	0.0393755	0.158454	0.161887
MAPK8	GMP versus Mono	0.0409314	0.160158	-0.142606
MAZ	GMP versus Mono	0.0409662	0.160158	-0.145824
PPP2R5C	GMP versus Mono	0.0413444	0.160158	0.173438
HNF4A	GMP versus Mono	0.0413455	0.160158	-0.160401
CHEK1	GMP versus Mono	0.0414037	0.160158	-0.170195
HRAS	GMP versus Mono	0.0422802	0.162291	0.149941
TLR4	GMP versus Mono	0.0435413	0.165856	0.165013
MAPK8IP1	GMP versus Mono	0.0440513	0.166527	-0.186311
MAP3K1	GMP versus Mono	0.0452381	0.169728	0.182967
BCR.ABL.fusion	GMP versus Mono	0.0458299	0.170349	-0.232665
CBX3	GMP versus Mono	0.0460865	0.170349	0.271307
RBPJ	GMP versus Mono	0.0481392	0.175634	0.164067
KHSRP	GMP versus Mono	0.0482201	0.175634	-0.250058
TGFBR2	GMP versus Mono	0.0490269	0.177278	0.145478
WT1	GMP versus Mono	0.0520277	0.186776	0.252332
DLX5	GMP versus Mono	0.0547712	0.19522	-0.15768
BCAR1	GMP versus Mono	0.0557932	0.196171	0.151191
STAT5B	GMP versus Mono	0.0558242	0.196171	0.148413
LRP5	GMP versus Mono	0.060188	0.210026	0.142211
TCF12	GMP versus Mono	0.0606269	0.210089	0.188951
MAFK	GMP versus Mono	0.0611346	0.210388	0.260573
IL1R1	GMP versus Mono	0.0619698	0.211801	-0.0697498
PPP1CA	GMP versus Mono	0.0648017	0.219252	-0.123119
CTNNB1	GMP versus Mono	0.0654705	0.219252	-0.104444
YAP1	GMP versus Mono	0.0659506	0.219252	0.127786
KLF4	GMP versus Mono	0.0662028	0.219252	-0.152036
MET	GMP versus Mono	0.0663468	0.219252	0.150642
KLF1	GMP versus Mono	0.0677639	0.222462	-0.190349
GSK3A	GMP versus Mono	0.0684351	0.223197	-0.143975
SRC	GMP versus Mono	0.0707615	0.229286	0.136277
STAT4	GMP versus Mono	0.0714161	0.229914	-0.138097
MAFF	GMP versus Mono	0.0729061	0.232984	0.235673
SOX9	GMP versus Mono	0.0733035	0.232984	0.219969
HDAC2	GMP versus Mono	0.0750862	0.237019	-0.147281
CDK2	GMP versus Mono	0.0755232	0.237019	-0.130095
NOTCH1	GMP versus Mono	0.0759982	0.237019	0.10745
PML	GMP versus Mono	0.0782991	0.242032	0.144682
SGK1	GMP versus Mono	0.0785755	0.242032	-0.174137
IL4R	GMP versus Mono	0.0816946	0.250096	0.115392
NFKB1	GMP versus Mono	0.0851613	0.259119	-0.131788
CoREST.HDAC.complex	GMP versus Mono	0.0866007	0.261842	-0.153978
CDK7	GMP versus Mono	0.0871058	0.261842	-0.201378
FOSL1	GMP versus Mono	0.0884304	0.264232	-0.24837
SMC3	GMP versus Mono	0.0902282	0.267999	-0.148927
RFX.complex	GMP versus Mono	0.0919233	0.269687	0.219193
AKT	GMP versus Mono	0.0924052	0.269687	-0.0855102
PAK2	GMP versus Mono	0.0927675	0.269687	0.210585
CHEK2	GMP versus Mono	0.0929582	0.269687	-0.148009
AURKA	GMP versus Mono	0.0970905	0.280047	0.124365
Calcineurin	GMP versus Mono	0.0998417	0.286328	0.178794
ATR	GMP versus Mono	0.100957	0.287608	-0.209152
MLL1.complex	GMP versus Mono	0.101441	0.287608	0.179033
STAT3	GMP versus Mono	0.102235	0.288222	-0.0493469
FADD	GMP versus Mono	0.1049	0.294074	0.163634
USF1	GMP versus Mono	0.107241	0.298393	-0.190964
SMARCD3	GMP versus Mono	0.108199	0.298393	-0.182815
SGK3	GMP versus Mono	0.108235	0.298393	-0.185771
CRTC3	GMP versus Mono	0.112618	0.308377	-0.22279
Myog.SWI.SNF.complex	GMP versus Mono	0.114999	0.308377	-0.234797
MAF	GMP versus Mono	0.115177	0.308377	-0.12769
MAP2K2	GMP versus Mono	0.115221	0.308377	-0.153035
DDB1	GMP versus Mono	0.115736	0.308377	0.223021
SDC4	GMP versus Mono	0.116026	0.308377	0.187229
SIRT1	GMP versus Mono	0.116182	0.308377	-0.113468
MYB	GMP versus Mono	0.117175	0.309367	-0.106813
SYK	GMP versus Mono	0.118545	0.310557	0.164687
MYOCD	GMP versus Mono	0.11887	0.310557	-0.181929
RFXANK	GMP versus Mono	0.120243	0.312025	0.226898
TRAF3	GMP versus Mono	0.120683	0.312025	0.154689
TYK2	GMP versus Mono	0.122385	0.313278	0.127455
SMAD1	GMP versus Mono	0.122423	0.313278	-0.0953862
JAG2	GMP versus Mono	0.123505	0.314433	0.107034
TRAF6	GMP versus Mono	0.126858	0.321331	0.152094
MAPK11	GMP versus Mono	0.128136	0.322928	-0.140057
JAG1	GMP versus Mono	0.129876	0.32549	0.111383
PTPN6	GMP versus Mono	0.131062	0.32549	0.146112
JAK2	GMP versus Mono	0.131109	0.32549	0.104427
PAX7	GMP versus Mono	0.137662	0.33609	0.142206
TAL1	GMP versus Mono	0.137888	0.33609	-0.0928859
SMAD2	GMP versus Mono	0.138301	0.33609	-0.0948458
BMI1	GMP versus Mono	0.140605	0.33609	0.115993
PTPRR	GMP versus Mono	0.141136	0.33609	0.217345
IGF1R	GMP versus Mono	0.142081	0.33609	0.109574
CSNK1E	GMP versus Mono	0.142114	0.33609	-0.202939
SMAD4	GMP versus Mono	0.14222	0.33609	-0.107721
BORA	GMP versus Mono	0.142268	0.33609	-0.118384
CyclinD.CDK4	GMP versus Mono	0.14298	0.33609	-0.121825
ERBB4	GMP versus Mono	0.143386	0.33609	0.128016
SKI	GMP versus Mono	0.143908	0.33609	-0.11828
TBP	GMP versus Mono	0.144135	0.33609	-0.235626
RASA1	GMP versus Mono	0.145924	0.338679	0.1471
NFYB	GMP versus Mono	0.150671	0.348078	-0.210735
HDAC1	GMP versus Mono	0.151771	0.349004	-0.114832
NR2F2	GMP versus Mono	0.153855	0.352172	0.203075
TLRs	GMP versus Mono	0.154843	0.352815	0.117521
ULK1	GMP versus Mono	0.159358	0.359948	-0.191656
ARNT	GMP versus Mono	0.159416	0.359948	-0.136674
GLI3	GMP versus Mono	0.16163	0.362602	0.112427
ID3	GMP versus Mono	0.162122	0.362602	-0.182416
MEF2A	GMP versus Mono	0.163301	0.362602	-0.0971457
PRMT5	GMP versus Mono	0.163498	0.362602	0.147956
SKIL	GMP versus Mono	0.164736	0.363731	0.202046
HIF1A	GMP versus Mono	0.165883	0.364651	0.0972868
NCOA3	GMP versus Mono	0.166951	0.365388	0.0983301
MAPK7	GMP versus Mono	0.169441	0.369218	0.253951
CyclinE.CDK2	GMP versus Mono	0.171353	0.371762	0.168003
PIK3CA	GMP versus Mono	0.17222	0.372025	0.109628
AKT1	GMP versus Mono	0.173766	0.372424	-0.0760206
GATA6	GMP versus Mono	0.17431	0.372424	-0.142706
MEIS1	GMP versus Mono	0.175049	0.372424	0.219678
CyclinB.CDK1	GMP versus Mono	0.17539	0.372424	0.121493
PPM1A	GMP versus Mono	0.18304	0.38481	-0.130101
MAP3K10	GMP versus Mono	0.18347	0.38481	-0.135944
CYLD	GMP versus Mono	0.183536	0.38481	0.120617
KRAS	GMP versus Mono	0.185513	0.386127	0.167407
GNG12	GMP versus Mono	0.185712	0.386127	0.102868
REST	GMP versus Mono	0.186894	0.386972	-0.226131
ASH2L	GMP versus Mono	0.188962	0.389636	0.182935
RCOR1	GMP versus Mono	0.191717	0.393689	-0.173392
MEF2C	GMP versus Mono	0.192802	0.394295	-0.157718
NR2F1	GMP versus Mono	0.197529	0.402314	0.177045
NR1H3	GMP versus Mono	0.198728	0.403111	-0.130578
RELA	GMP versus Mono	0.200359	0.404774	-0.0604963
RPS6KA4	GMP versus Mono	0.201701	0.405843	-0.099038
STAT1	GMP versus Mono	0.203052	0.40692	0.0711845
HDAC5	GMP versus Mono	0.205044	0.407762	0.0932197
ESR1	GMP versus Mono	0.205107	0.407762	0.0718376
DDB2	GMP versus Mono	0.206281	0.408133	-0.14773
POU2F1	GMP versus Mono	0.206929	0.408133	-0.127391
PSENEN	GMP versus Mono	0.208968	0.410531	0.123943
DDX5	GMP versus Mono	0.211361	0.413605	-0.143152
NFY	GMP versus Mono	0.214964	0.417548	-0.164923
SMAD3	GMP versus Mono	0.21505	0.417548	-0.10053
PPP2CA	GMP versus Mono	0.21978	0.422656	0.16007
MAPK3	GMP versus Mono	0.220037	0.422656	-0.0626542
NUMB	GMP versus Mono	0.220221	0.422656	0.109295
SMAD3.SMAD4	GMP versus Mono	0.222116	0.424348	-0.117118
PAX3	GMP versus Mono	0.222804	0.424348	-0.143309
AHR	GMP versus Mono	0.223966	0.42462	-0.179067
LAT	GMP versus Mono	0.224649	0.42462	0.0980284
MAP2K6	GMP versus Mono	0.22692	0.427294	-0.102157
MSX1	GMP versus Mono	0.228582	0.428806	-0.145733
RHOA	GMP versus Mono	0.229826	0.429524	0.114471
NFYA	GMP versus Mono	0.232003	0.431976	-0.133967
TP63	GMP versus Mono	0.233826	0.432295	0.091724
SIK1	GMP versus Mono	0.234689	0.432295	-0.122653
SKP2	GMP versus Mono	0.235341	0.432295	-0.162317
PKCtheta.Nfix	GMP versus Mono	0.23564	0.432295	-0.120537
CEBPD	GMP versus Mono	0.237547	0.434198	-0.162011
PTPN1	GMP versus Mono	0.240555	0.437292	-0.0922163
RARB	GMP versus Mono	0.240993	0.437292	0.108944
MEF2D	GMP versus Mono	0.242224	0.437934	-0.140603
KDM1A	GMP versus Mono	0.24447	0.4404	-0.144063
MAFA	GMP versus Mono	0.246802	0.441857	-0.0818086
ETS1	GMP versus Mono	0.247165	0.441857	-0.145171
PARD6.SMURF1	GMP versus Mono	0.247936	0.441857	0.141577
mTORC1	GMP versus Mono	0.252777	0.445785	-0.118127
STK4	GMP versus Mono	0.253125	0.445785	0.0894726
PPP3CB	GMP versus Mono	0.254596	0.445785	0.10169
ULK1.Atg13.Fip200	GMP versus Mono	0.254693	0.445785	-0.145775
DLK1	GMP versus Mono	0.255885	0.445785	0.0850024
CUL4A	GMP versus Mono	0.256434	0.445785	0.155834
PRKD1	GMP versus Mono	0.257761	0.445785	0.0891748
HOXA9	GMP versus Mono	0.258933	0.445785	0.147861
BCL3	GMP versus Mono	0.259121	0.445785	0.144604
IKBKG	GMP versus Mono	0.259686	0.445785	-0.110832
NAE1	GMP versus Mono	0.259967	0.445785	0.11529
RANBP9	GMP versus Mono	0.261321	0.446572	0.115316
AXIN1	GMP versus Mono	0.264061	0.449714	0.0948305
ID2	GMP versus Mono	0.27308	0.463492	-0.121561
CDK4	GMP versus Mono	0.27743	0.46928	0.0874877
MYBL2	GMP versus Mono	0.280479	0.472835	-0.129834
RANBP3	GMP versus Mono	0.285388	0.479491	-0.0906993
GSK3B.Axin.APC	GMP versus Mono	0.288145	0.482498	0.0825947
PRKAA2	GMP versus Mono	0.289483	0.483116	-0.136396
PTK2	GMP versus Mono	0.291187	0.484123	0.0775008
MAPK1	GMP versus Mono	0.292026	0.484123	0.0585931
RFX5	GMP versus Mono	0.294862	0.486082	0.106851
CCND1	GMP versus Mono	0.295156	0.486082	-0.0797086
PRKACA	GMP versus Mono	0.299134	0.491012	0.103558
UBTF	GMP versus Mono	0.302227	0.491532	0.0786047
TP53	GMP versus Mono	0.302454	0.491532	0.0630248
JAK3	GMP versus Mono	0.303227	0.491532	0.0950654
ATF1	GMP versus Mono	0.30339	0.491532	-0.073077
CUL3	GMP versus Mono	0.3057	0.493671	0.139619
ABL1	GMP versus Mono	0.313376	0.504435	-0.0821276
NR3C1	GMP versus Mono	0.314839	0.504487	-0.0542323
MAPK15	GMP versus Mono	0.315431	0.504487	-0.113308
NOS1	GMP versus Mono	0.317361	0.505952	0.13695
PARD6A	GMP versus Mono	0.32184	0.51146	0.0973536
FOXO3	GMP versus Mono	0.32567	0.515902	0.0716349
HES1	GMP versus Mono	0.328413	0.518601	0.112891
RIPK1	GMP versus Mono	0.33141	0.521684	0.0980687
AGTR1	GMP versus Mono	0.337565	0.529701	0.0718614
MITF	GMP versus Mono	0.340706	0.531563	0.0666738
MAP2K4	GMP versus Mono	0.340882	0.531563	-0.0708734
CASP3	GMP versus Mono	0.345113	0.536484	-0.112644
MAPK12	GMP versus Mono	0.349339	0.541368	-0.0858993
CHUK	GMP versus Mono	0.350924	0.54214	-0.0781982
KAT2B	GMP versus Mono	0.352309	0.5426	0.111338
NR4A2	GMP versus Mono	0.356004	0.545137	0.121458
LCK	GMP versus Mono	0.356141	0.545137	-0.0734805
MAPKAPK2	GMP versus Mono	0.358937	0.547736	0.0659622
AHR.ARNT	GMP versus Mono	0.361451	0.54989	-0.118193
MAPK13	GMP versus Mono	0.369148	0.559894	-0.0982133
PRKG1	GMP versus Mono	0.376134	0.565944	0.120953
PTEN	GMP versus Mono	0.37614	0.565944	-0.0621384
MAP3K5	GMP versus Mono	0.37654	0.565944	0.0684292
BAD	GMP versus Mono	0.378887	0.567761	0.0593954
TFEB	GMP versus Mono	0.385377	0.573673	-0.0654026
SIRT2	GMP versus Mono	0.385431	0.573673	0.121427
APEX1	GMP versus Mono	0.386281	0.573673	-0.078426
TP53RK	GMP versus Mono	0.387621	0.573956	-0.0692848
DCX.DET1.COP1	GMP versus Mono	0.388791	0.573985	0.129137
MAP2K1	GMP versus Mono	0.393605	0.579377	-0.0643089
CXCL1	GMP versus Mono	0.399089	0.585448	0.0814009
KMT2A	GMP versus Mono	0.400076	0.585448	-0.124741
CDK1	GMP versus Mono	0.403823	0.58755	0.076988
VDR	GMP versus Mono	0.405697	0.58755	-0.0859821
PPP2CB	GMP versus Mono	0.405728	0.58755	-0.105837
AMPK	GMP versus Mono	0.407795	0.58755	-0.0797241
CRL4.CRBN.	GMP versus Mono	0.408	0.58755	0.121904
PRKCA	GMP versus Mono	0.408577	0.58755	0.0678828
IKBKE	GMP versus Mono	0.411289	0.58975	-0.1208
STK3	GMP versus Mono	0.412876	0.59033	0.0527919
EWSR1	GMP versus Mono	0.42033	0.59927	0.0568618
JUND	GMP versus Mono	0.421895	0.599789	-0.0453183
CRX	GMP versus Mono	0.424435	0.601685	-0.0694012
MKL1	GMP versus Mono	0.427226	0.602335	0.0612047
MLL2.complex	GMP versus Mono	0.428132	0.602335	0.0944338
MYD88	GMP versus Mono	0.428625	0.602335	0.0528789
RUNX2	GMP versus Mono	0.430587	0.602335	-0.0558304
AR	GMP versus Mono	0.430929	0.602335	0.0516589
CDC25A	GMP versus Mono	0.433095	0.603672	0.105797
CDKN2A	GMP versus Mono	0.435176	0.604883	-0.0926591
ROBO	GMP versus Mono	0.437032	0.605774	-0.11239
IRAK1	GMP versus Mono	0.439164	0.607044	-0.0550762
MLL.SET.subcomplex	GMP versus Mono	0.441327	0.60777	0.0989686
NR1H4	GMP versus Mono	0.442175	0.60777	-0.0835566
PTPN2	GMP versus Mono	0.443343	0.60777	-0.0689206
CDK3	GMP versus Mono	0.450253	0.615552	0.0720329
BRCA1	GMP versus Mono	0.451766	0.615933	0.0532432
PAK1	GMP versus Mono	0.458368	0.62323	0.053292
RPS6KB1	GMP versus Mono	0.460265	0.62411	0.0555799
WWTR1	GMP versus Mono	0.461794	0.624161	-0.0674628
RPS6KA2	GMP versus Mono	0.462805	0.624161	-0.0829994
RNF111	GMP versus Mono	0.476301	0.640631	0.0840843
AKT2	GMP versus Mono	0.480513	0.64456	-0.0556863
TCF7L2	GMP versus Mono	0.482635	0.64567	-0.0614544
ERCC6	GMP versus Mono	0.486396	0.648962	-0.0762983
GATA3	GMP versus Mono	0.489204	0.650968	0.0878468
NKX3.1	GMP versus Mono	0.496418	0.657445	0.0822284
NAE	GMP versus Mono	0.496707	0.657445	0.0837417
JNK	GMP versus Mono	0.501073	0.66147	-0.0523123
LYN	GMP versus Mono	0.504437	0.664154	-0.0683141
PRDM1	GMP versus Mono	0.507193	0.666025	-0.0766488
RET	GMP versus Mono	0.510971	0.669225	0.0175649
CAMK1	GMP versus Mono	0.517485	0.675982	0.0626485
LEF1	GMP versus Mono	0.521872	0.679932	0.0488773
GABARAP	GMP versus Mono	0.52391	0.68081	0.0487818
RBBP5	GMP versus Mono	0.527279	0.683408	0.0895532
TBK1	GMP versus Mono	0.529909	0.685037	0.0711858
FOS	GMP versus Mono	0.534532	0.689228	-0.0430536
MAPK10	GMP versus Mono	0.537754	0.689811	-0.0442597
PPP1R15A	GMP versus Mono	0.537878	0.689811	-0.0754716
RPS6KA5	GMP versus Mono	0.539273	0.689811	-0.0447083
MAP3K7	GMP versus Mono	0.540513	0.689811	-0.0535942
CDON	GMP versus Mono	0.546845	0.696112	-0.0330529
PIAS1	GMP versus Mono	0.548475	0.69641	-0.0494537
REL	GMP versus Mono	0.552426	0.69896	-0.0840155
ROCK1	GMP versus Mono	0.554742	0.69896	-0.0606349
CDKN1A	GMP versus Mono	0.55588	0.69896	0.037732
DVL3	GMP versus Mono	0.556995	0.69896	-0.0587051
HDAC6	GMP versus Mono	0.557487	0.69896	0.0469731
CSNK1A1	GMP versus Mono	0.561403	0.702105	-0.0813064
BMPR1A	GMP versus Mono	0.5653	0.705212	0.0632252
MAP2K3	GMP versus Mono	0.571945	0.711722	0.0482587
SCF.betaTRCP	GMP versus Mono	0.573385	0.711739	-0.0961048
MAX	GMP versus Mono	0.577771	0.715404	0.0414317
SFN	GMP versus Mono	0.584616	0.720803	-0.0475947
SET	GMP versus Mono	0.586385	0.720803	-0.0492721
PAX6	GMP versus Mono	0.587175	0.720803	-0.0558008
TCF4	GMP versus Mono	0.587909	0.720803	-0.0447392
BTK	GMP versus Mono	0.602204	0.736519	0.0454783
TEAD4	GMP versus Mono	0.605128	0.738286	-0.0491213
SF1	GMP versus Mono	0.607822	0.739764	0.0857783
TEAD1	GMP versus Mono	0.620589	0.753464	0.0473673
MEK1.2	GMP versus Mono	0.624618	0.756515	-0.034759
RPS6KA3	GMP versus Mono	0.627162	0.757758	-0.0372914
CSNK2B	GMP versus Mono	0.637177	0.767447	0.0655045
MTOR	GMP versus Mono	0.638258	0.767447	-0.032674
CREBBP	GMP versus Mono	0.643946	0.772426	-0.0339242
PRKCQ	GMP versus Mono	0.647663	0.775021	-0.0333372
ELF3	GMP versus Mono	0.656424	0.783224	0.0448153
POLR2A	GMP versus Mono	0.657657	0.783224	-0.0329652
PPP1CC	GMP versus Mono	0.660063	0.784218	-0.0672778
NCOR1	GMP versus Mono	0.664415	0.787513	0.03473
HSF2	GMP versus Mono	0.672489	0.794603	0.0627025
CEBPA	GMP versus Mono	0.674864	0.794603	-0.0324639
NEDD4L	GMP versus Mono	0.675513	0.794603	-0.0383531
ZFYVE9	GMP versus Mono	0.67757	0.794603	0.0418346
FOXA2	GMP versus Mono	0.678358	0.794603	-0.0566093
P300.PCAF	GMP versus Mono	0.681854	0.795623	0.0484288
MXI1	GMP versus Mono	0.682418	0.795623	0.0440742
CUL1	GMP versus Mono	0.689047	0.800995	0.0587207
MYOG	GMP versus Mono	0.690237	0.800995	0.0399804
DYRK1B	GMP versus Mono	0.692878	0.802195	-0.0508497
LATS1	GMP versus Mono	0.701417	0.810202	-0.0373582
SCF.SKP2	GMP versus Mono	0.711237	0.819647	-0.0631838
RFXAP	GMP versus Mono	0.723159	0.828988	0.0518163
FHL2	GMP versus Mono	0.723667	0.828988	0.0439979
VAV1	GMP versus Mono	0.724326	0.828988	0.0370907
ROBO1	GMP versus Mono	0.726571	0.829654	-0.0400332
NFATC2	GMP versus Mono	0.730999	0.832805	-0.0259098
PTCRA	GMP versus Mono	0.734699	0.835114	-0.0262801
CSNK1D	GMP versus Mono	0.737434	0.836157	-0.0300858
NLK	GMP versus Mono	0.739526	0.836157	-0.0401361
CDK6	GMP versus Mono	0.740644	0.836157	0.0309086
NCOR2	GMP versus Mono	0.745674	0.838573	0.0283591
TFDP1	GMP versus Mono	0.74642	0.838573	0.0269263
IKBKB	GMP versus Mono	0.747913	0.838573	0.0299959
ATM	GMP versus Mono	0.749506	0.838573	0.0297025
KMT2D	GMP versus Mono	0.771479	0.861226	0.0343437
TFAP2A	GMP versus Mono	0.775064	0.863297	0.0240187
BTRC	GMP versus Mono	0.788	0.871219	-0.0450654
SPAG9	GMP versus Mono	0.7968	0.871219	-0.022413
SETDB1	GMP versus Mono	0.796971	0.871219	-0.05178
HNF1A	GMP versus Mono	0.798014	0.871219	0.0267436
PTPRC	GMP versus Mono	0.800389	0.871219	0.0159585
PHB2	GMP versus Mono	0.80068	0.871219	-0.0212706
RYK	GMP versus Mono	0.800707	0.871219	0.0297844
FOXM1	GMP versus Mono	0.802698	0.871219	0.0189977
HTT	GMP versus Mono	0.804378	0.871219	-0.0193592
ILF3	GMP versus Mono	0.805603	0.871219	0.0183389
YWHAZ	GMP versus Mono	0.805885	0.871219	-0.0163377
SH3RF1	GMP versus Mono	0.807354	0.871219	0.0203927
INCENP	GMP versus Mono	0.807456	0.871219	-0.0337971
CDK5	GMP versus Mono	0.808207	0.871219	-0.0212066
CAMKK2	GMP versus Mono	0.808366	0.871219	-0.0186856
TFCP2	GMP versus Mono	0.82499	0.887219	0.0169254
SP1	GMP versus Mono	0.826926	0.88739	-0.0122765
NUAK1	GMP versus Mono	0.831169	0.890029	0.0173715
FOXP3	GMP versus Mono	0.834902	0.89193	0.0220798
SREBF2	GMP versus Mono	0.836519	0.89193	-0.0169362
PDX1	GMP versus Mono	0.847732	0.901958	0.0341218
KAT5	GMP versus Mono	0.853429	0.904164	0.0249473
STAT6	GMP versus Mono	0.853429	0.904164	-0.0126175
LATS2	GMP versus Mono	0.861998	0.910793	-0.0131402
HMT	GMP versus Mono	0.863337	0.910793	-0.023845
IKK.complex	GMP versus Mono	0.870297	0.916199	0.012124
GNAQ	GMP versus Mono	0.874104	0.918269	-0.016739
NR4A1	GMP versus Mono	0.881092	0.923666	-0.0116198
ITCH	GMP versus Mono	0.887881	0.927859	-0.0114023
FYN	GMP versus Mono	0.890649	0.927859	0.0102957
CASP8	GMP versus Mono	0.890671	0.927859	-0.0101742
NCOA1	GMP versus Mono	0.897863	0.932207	0.0106317
RUNX3	GMP versus Mono	0.898581	0.932207	-0.0130842
CDX2	GMP versus Mono	0.90122	0.933006	-0.00824218
X14.3.3	GMP versus Mono	0.917318	0.947705	0.00780427
MDM2	GMP versus Mono	0.922612	0.950152	-0.00693386
RUNX1	GMP versus Mono	0.923494	0.950152	0.00573621
SCF.FBW7	GMP versus Mono	0.933952	0.958934	-0.0141585
SPEN	GMP versus Mono	0.941938	0.965147	0.008424
SMAD5	GMP versus Mono	0.944644	0.965938	0.00944752
IKZF1	GMP versus Mono	0.948714	0.968116	-0.00477752
SRF	GMP versus Mono	0.960164	0.977799	0.00276553
GNA13	GMP versus Mono	0.965615	0.981348	-0.00433124
RPL10	GMP versus Mono	0.975006	0.987158	0.00394233
SREBF1	GMP versus Mono	0.977245	0.987158	-0.00200581
SETDB1.NLK.CHD7	GMP versus Mono	0.977266	0.987158	-0.00452839
STK11	GMP versus Mono	0.981679	0.98936	-0.00164912
CHD7	GMP versus Mono	0.983412	0.98936	0.00386185
CUX1	GMP versus Mono	0.996326	0.998419	0.000692675
CASP8AP2	GMP versus Mono	0.996418	0.998419	-0.000407823
PRKDC	GMP versus Mono	0.99996	0.99996	-7.67875e-06
