# Supplementary material for: Knowledge-primed neural networks enable biologically interpretable deep learning on single-cell sequencing data
Source: Genome Biol. 2020 Aug 3;21:190. doi: 10.1186/s13059-020-02100-5 (PMC7397672; doi:10.1186/s13059-020-02100-5)
Supplement: Supplementary file 9 — Additional file 9: Table S7. Differential node weights comparing GEN KPNNs trained to distinguish different molecular subtypes of glioblastoma. [file 13059_2020_2100_MOESM9_ESM.xlsx]

## Sheet: Table S7
Node	Comparison	p-value	Adjusted p-value	Differential node weight
TP53	AC/OPC versus MES/NPC	3.31592e-13	1.73754e-10	0.468464
LEF1	AC/OPC versus MES/NPC	7.19885e-12	1.8861e-09	0.561923
HIF1A	AC/OPC versus MES/NPC	4.26988e-07	7.45807e-05	-0.449791
HNF1A	AC/OPC versus MES/NPC	2.17688e-05	0.00285171	0.791245
RUNX2	AC/OPC versus MES/NPC	9.6337e-05	0.0100961	0.330653
AR	AC/OPC versus MES/NPC	0.000271791	0.0237364	0.171909
SPEN	AC/OPC versus MES/NPC	0.000415645	0.031114	0.59699
NOTCH2	AC/OPC versus MES/NPC	0.000597192	0.0391161	-0.294383
EZH2	AC/OPC versus MES/NPC	0.000799013	0.04329	-0.2369
FHL2	AC/OPC versus MES/NPC	0.000826145	0.04329	0.728916
NR2C2	AC/OPC versus MES/NPC	0.000968617	0.0461414	0.531481
NR1H4	AC/OPC versus MES/NPC	0.00142292	0.0621344	0.525788
CEBPA	AC/OPC versus MES/NPC	0.00176479	0.0711345	0.256673
NCOR2	AC/OPC versus MES/NPC	0.00195454	0.0731558	0.378935
NCK1	AC/OPC versus MES/NPC	0.00210212	0.0734339	-0.345498
EGFR	AC/OPC versus MES/NPC	0.00330611	0.108275	-0.185475
TRIM28	AC/OPC versus MES/NPC	0.00377774	0.112997	0.501292
CREB1	AC/OPC versus MES/NPC	0.00388158	0.112997	-0.327558
RASA1	AC/OPC versus MES/NPC	0.00473871	0.130689	-0.321653
KMT2D	AC/OPC versus MES/NPC	0.00535716	0.139116	0.523702
MAP3K7	AC/OPC versus MES/NPC	0.00557524	0.139116	-0.263664
SIRT2	AC/OPC versus MES/NPC	0.00632644	0.146163	-0.446654
MAPK3	AC/OPC versus MES/NPC	0.00672991	0.146163	-0.246329
CDC25A	AC/OPC versus MES/NPC	0.00701676	0.146163	-0.441018
ATM	AC/OPC versus MES/NPC	0.00716088	0.146163	0.379174
HMT	AC/OPC versus MES/NPC	0.00725235	0.146163	0.519162
DVL2	AC/OPC versus MES/NPC	0.00798295	0.151099	0.342481
TEAD1	AC/OPC versus MES/NPC	0.00834496	0.151099	0.428843
HDAC1	AC/OPC versus MES/NPC	0.00851823	0.151099	0.22677
NFE2L2	AC/OPC versus MES/NPC	0.0086507	0.151099	0.342091
TCF3	AC/OPC versus MES/NPC	0.00942883	0.159378	-0.291111
KAT5	AC/OPC versus MES/NPC	0.0101042	0.159767	-0.439298
TCF12	AC/OPC versus MES/NPC	0.0101634	0.159767	0.424707
MLL2.complex	AC/OPC versus MES/NPC	0.0103665	0.159767	0.477449
DYRK1B	AC/OPC versus MES/NPC	0.0126923	0.186102	0.444313
PAX7	AC/OPC versus MES/NPC	0.0127857	0.186102	0.335793
TCF4	AC/OPC versus MES/NPC	0.013782	0.195088	0.23312
NR5A1	AC/OPC versus MES/NPC	0.0141476	0.195088	0.199792
ERBB2	AC/OPC versus MES/NPC	0.0145933	0.195397	-0.156884
CSNK2B	AC/OPC versus MES/NPC	0.0149158	0.195397	-0.459536
MAPKAPK2	AC/OPC versus MES/NPC	0.016083	0.205549	-0.281217
CDON	AC/OPC versus MES/NPC	0.0169035	0.210891	-0.152707
HDAC2	AC/OPC versus MES/NPC	0.0174042	0.212088	-0.278286
ATR	AC/OPC versus MES/NPC	0.0183657	0.21632	-0.409447
GTF2I	AC/OPC versus MES/NPC	0.0185771	0.21632	-0.19736
SPAG9	AC/OPC versus MES/NPC	0.0215666	0.245672	-0.228322
HNF4A	AC/OPC versus MES/NPC	0.0233447	0.260269	0.385194
PPP2CB	AC/OPC versus MES/NPC	0.0240889	0.262971	-0.403955
MLL1.complex	AC/OPC versus MES/NPC	0.0272435	0.291339	0.363783
IRAK1	AC/OPC versus MES/NPC	0.0278744	0.292124	-0.187245
ABL1	AC/OPC versus MES/NPC	0.0288524	0.292676	-0.236344
CUX1	AC/OPC versus MES/NPC	0.0294565	0.292676	-0.435737
PML	AC/OPC versus MES/NPC	0.0296028	0.292676	-0.210118
CDK1	AC/OPC versus MES/NPC	0.0303129	0.294148	-0.247049
RHOA	AC/OPC versus MES/NPC	0.0315255	0.300352	0.30921
NCOA3	AC/OPC versus MES/NPC	0.0339893	0.314103	0.118673
AKT1	AC/OPC versus MES/NPC	0.0354685	0.314103	-0.182863
STAT5A	AC/OPC versus MES/NPC	0.0355887	0.314103	-0.130543
ROBO1	AC/OPC versus MES/NPC	0.0362941	0.314103	-0.315985
ERCC6	AC/OPC versus MES/NPC	0.0368439	0.314103	-0.306545
NFATC2	AC/OPC versus MES/NPC	0.0371016	0.314103	-0.191154
RPS6KA4	AC/OPC versus MES/NPC	0.0371648	0.314103	-0.28037
MLL.SET.subcomplex	AC/OPC versus MES/NPC	0.0381964	0.314214	0.380773
SCF.FBW7	AC/OPC versus MES/NPC	0.0396695	0.314214	0.464748
FLI1	AC/OPC versus MES/NPC	0.0402856	0.314214	0.263844
RPL10	AC/OPC versus MES/NPC	0.0407134	0.314214	0.328604
TRAF6	AC/OPC versus MES/NPC	0.0407467	0.314214	-0.200236
PP2B	AC/OPC versus MES/NPC	0.0413261	0.314214	-0.183799
NLK	AC/OPC versus MES/NPC	0.0413763	0.314214	-0.308175
DUSP6	AC/OPC versus MES/NPC	0.0427867	0.314214	-0.253083
MAP3K5	AC/OPC versus MES/NPC	0.0427988	0.314214	-0.162027
INCENP	AC/OPC versus MES/NPC	0.0433887	0.314214	-0.332869
SMAD1	AC/OPC versus MES/NPC	0.0437859	0.314214	0.191528
KMT2A	AC/OPC versus MES/NPC	0.0443737	0.314214	-0.441933
POU2F1	AC/OPC versus MES/NPC	0.0476239	0.329516	0.320641
CEBPD	AC/OPC versus MES/NPC	0.0484296	0.329516	0.344659
MEF2C	AC/OPC versus MES/NPC	0.0488228	0.329516	-0.30657
KAT2B	AC/OPC versus MES/NPC	0.0490501	0.329516	-0.297737
KLF5	AC/OPC versus MES/NPC	0.051135	0.334781	0.192774
CASP3	AC/OPC versus MES/NPC	0.0515458	0.334781	-0.309475
SMAD2	AC/OPC versus MES/NPC	0.0517505	0.334781	-0.156833
ZBTB16	AC/OPC versus MES/NPC	0.0525399	0.335743	0.294331
ESR1	AC/OPC versus MES/NPC	0.0541112	0.337822	-0.0643675
CDK5	AC/OPC versus MES/NPC	0.0548241	0.337822	0.211216
TICAM1	AC/OPC versus MES/NPC	0.0551984	0.337822	-0.165286
AMPK	AC/OPC versus MES/NPC	0.0554441	0.337822	0.258839
ID3	AC/OPC versus MES/NPC	0.0562184	0.338603	0.307333
NPM1	AC/OPC versus MES/NPC	0.0587026	0.349547	-0.246173
IL4R	AC/OPC versus MES/NPC	0.0607541	0.354742	-0.11411
FRS2	AC/OPC versus MES/NPC	0.0609289	0.354742	-0.126448
SET	AC/OPC versus MES/NPC	0.0626191	0.360576	-0.276921
YAP1	AC/OPC versus MES/NPC	0.0645138	0.367448	0.175809
MAFG	AC/OPC versus MES/NPC	0.0656789	0.370062	-0.326419
ULK1	AC/OPC versus MES/NPC	0.0691849	0.382312	0.348914
PRKCD	AC/OPC versus MES/NPC	0.0699319	0.382312	0.195054
JUND	AC/OPC versus MES/NPC	0.0700419	0.382312	-0.198113
MAP3K14	AC/OPC versus MES/NPC	0.0745219	0.386321	-0.175417
MAPK1	AC/OPC versus MES/NPC	0.0745353	0.386321	-0.150376
SREBF2	AC/OPC versus MES/NPC	0.0745805	0.386321	-0.228815
MKL1	AC/OPC versus MES/NPC	0.0753789	0.386321	-0.221345
RXRA	AC/OPC versus MES/NPC	0.076261	0.386321	-0.152587
TFAP2A	AC/OPC versus MES/NPC	0.0773058	0.386321	-0.224611
HMGA2	AC/OPC versus MES/NPC	0.0781113	0.386321	-0.293966
PPARG	AC/OPC versus MES/NPC	0.0783003	0.386321	0.138177
AHR	AC/OPC versus MES/NPC	0.0784574	0.386321	-0.309175
ZEB1	AC/OPC versus MES/NPC	0.0788802	0.386321	0.312979
SKP2	AC/OPC versus MES/NPC	0.079441	0.386321	0.264933
MAPK8	AC/OPC versus MES/NPC	0.0796235	0.386321	-0.177924
GTF2A2	AC/OPC versus MES/NPC	0.0806556	0.387739	0.231047
MAFK	AC/OPC versus MES/NPC	0.0843566	0.401399	-0.305316
PRKDC	AC/OPC versus MES/NPC	0.0850291	0.401399	-0.385699
KHSRP	AC/OPC versus MES/NPC	0.0872971	0.408426	-0.26705
RANBP9	AC/OPC versus MES/NPC	0.0895581	0.413852	0.177534
ELK1	AC/OPC versus MES/NPC	0.0900366	0.413852	-0.191762
GSK3B.Axin.APC	AC/OPC versus MES/NPC	0.0912877	0.415955	0.152502
CDK2	AC/OPC versus MES/NPC	0.0935194	0.42195	0.195455
IKK.complex	AC/OPC versus MES/NPC	0.0942141	0.42195	0.133314
NCOR1	AC/OPC versus MES/NPC	0.0972503	0.431219	-0.197771
SGK1	AC/OPC versus MES/NPC	0.0980663	0.431219	0.200095
HSP90AB1	AC/OPC versus MES/NPC	0.0987524	0.431219	0.264471
CyclinE.CDK2	AC/OPC versus MES/NPC	0.101249	0.435139	-0.262457
PDX1	AC/OPC versus MES/NPC	0.102058	0.435139	-0.387705
FOXO1	AC/OPC versus MES/NPC	0.102141	0.435139	0.127736
SH3RF1	AC/OPC versus MES/NPC	0.103692	0.438184	-0.201506
PPARD	AC/OPC versus MES/NPC	0.105264	0.439344	-0.209873
HDAC5	AC/OPC versus MES/NPC	0.106151	0.439344	0.159555
CLOCK	AC/OPC versus MES/NPC	0.107283	0.439344	0.249324
PRKG1	AC/OPC versus MES/NPC	0.107321	0.439344	0.250411
CTNNB1	AC/OPC versus MES/NPC	0.108854	0.442168	0.08774
SMAD5	AC/OPC versus MES/NPC	0.112753	0.454481	0.322674
KLF4	AC/OPC versus MES/NPC	0.115845	0.46022	0.165279
JAK2	AC/OPC versus MES/NPC	0.115933	0.46022	-0.112523
RCOR1	AC/OPC versus MES/NPC	0.117157	0.461582	0.232466
SKIL	AC/OPC versus MES/NPC	0.119083	0.465668	0.324328
RARG	AC/OPC versus MES/NPC	0.122192	0.473256	-0.197743
MEF2A	AC/OPC versus MES/NPC	0.124093	0.473256	-0.135782
MET	AC/OPC versus MES/NPC	0.12452	0.473256	0.114525
MYD88	AC/OPC versus MES/NPC	0.124636	0.473256	-0.118704
TCF7L2	AC/OPC versus MES/NPC	0.127392	0.476187	-0.195926
KIT	AC/OPC versus MES/NPC	0.128539	0.476187	-0.109033
RNF111	AC/OPC versus MES/NPC	0.130705	0.476187	0.207919
ELF3	AC/OPC versus MES/NPC	0.130767	0.476187	0.228513
STAT3	AC/OPC versus MES/NPC	0.130902	0.476187	-0.154724
MAP2K3	AC/OPC versus MES/NPC	0.131432	0.476187	-0.152257
SMARCD3	AC/OPC versus MES/NPC	0.131834	0.476187	-0.229506
PRKCA	AC/OPC versus MES/NPC	0.13281	0.476187	0.141304
CRX	AC/OPC versus MES/NPC	0.134669	0.476187	-0.179087
TEAD4	AC/OPC versus MES/NPC	0.13486	0.476187	0.240601
SCF.betaTRCP	AC/OPC versus MES/NPC	0.13613	0.476187	0.345032
TLRs	AC/OPC versus MES/NPC	0.136955	0.476187	-0.104997
STAT6	AC/OPC versus MES/NPC	0.137222	0.476187	-0.114203
RFXAP	AC/OPC versus MES/NPC	0.138231	0.476532	-0.209258
MAP2K4	AC/OPC versus MES/NPC	0.140198	0.478527	-0.123275
IRF3	AC/OPC versus MES/NPC	0.140636	0.478527	-0.194917
THRB	AC/OPC versus MES/NPC	0.1428	0.478655	-0.188573
ID2	AC/OPC versus MES/NPC	0.14373	0.478655	0.224487
ULK1.Atg13.Fip200	AC/OPC versus MES/NPC	0.143978	0.478655	0.264258
MYOD.HEB	AC/OPC versus MES/NPC	0.144384	0.478655	0.146862
SCF.SKP2	AC/OPC versus MES/NPC	0.145241	0.478655	0.331952
CoREST.HDAC.complex	AC/OPC versus MES/NPC	0.148168	0.484615	0.190183
NEDD4L	AC/OPC versus MES/NPC	0.149711	0.484615	0.202845
CSNK1D	AC/OPC versus MES/NPC	0.149824	0.484615	0.173372
GLI1	AC/OPC versus MES/NPC	0.152174	0.489197	0.138647
CSNK1E	AC/OPC versus MES/NPC	0.154984	0.495192	-0.246297
TBK1	AC/OPC versus MES/NPC	0.15798	0.496449	-0.206308
KDM1A	AC/OPC versus MES/NPC	0.158018	0.496449	0.208964
BRCA1	AC/OPC versus MES/NPC	0.159065	0.496449	-0.119475
ASH2L	AC/OPC versus MES/NPC	0.160928	0.496449	0.226494
CUL1	AC/OPC versus MES/NPC	0.161135	0.496449	0.321345
PRKAA1	AC/OPC versus MES/NPC	0.161405	0.496449	0.196351
HES1	AC/OPC versus MES/NPC	0.16284	0.496449	0.208265
NOTCH1	AC/OPC versus MES/NPC	0.163274	0.496449	-0.102073
CAMK1	AC/OPC versus MES/NPC	0.163904	0.496449	0.187649
FLT3	AC/OPC versus MES/NPC	0.166254	0.500673	-0.0806715
g.secretase	AC/OPC versus MES/NPC	0.167616	0.500726	-0.0943376
NFYA	AC/OPC versus MES/NPC	0.168183	0.500726	0.205239
PKCtheta.Nfix	AC/OPC versus MES/NPC	0.173086	0.511337	0.190715
CSNK2A1	AC/OPC versus MES/NPC	0.173698	0.511337	-0.158673
MYBL2	AC/OPC versus MES/NPC	0.176315	0.515934	0.206088
CHD7	AC/OPC versus MES/NPC	0.177816	0.515934	-0.303724
POU3F1	AC/OPC versus MES/NPC	0.178285	0.515934	0.199672
PRRX1	AC/OPC versus MES/NPC	0.179199	0.515934	-0.176124
DDB2	AC/OPC versus MES/NPC	0.182883	0.517891	-0.213997
CASP8	AC/OPC versus MES/NPC	0.18311	0.517891	-0.0987279
BMPR1A	AC/OPC versus MES/NPC	0.18349	0.517891	0.180438
MAPK8IP1	AC/OPC versus MES/NPC	0.184259	0.517891	-0.184753
CUL3	AC/OPC versus MES/NPC	0.185652	0.517891	0.294631
SREBF1	AC/OPC versus MES/NPC	0.186536	0.517891	0.111888
NR4A1	AC/OPC versus MES/NPC	0.187317	0.517891	-0.104721
PAK2	AC/OPC versus MES/NPC	0.188327	0.517891	0.21602
LATS1	AC/OPC versus MES/NPC	0.188773	0.517891	-0.179456
PRKCE	AC/OPC versus MES/NPC	0.192348	0.52495	0.140492
MYBL1	AC/OPC versus MES/NPC	0.195334	0.530336	0.173172
EP300	AC/OPC versus MES/NPC	0.201606	0.538475	0.0838522
MAP3K10	AC/OPC versus MES/NPC	0.203209	0.538475	-0.188339
SF1	AC/OPC versus MES/NPC	0.203535	0.538475	0.263997
SETDB1	AC/OPC versus MES/NPC	0.203637	0.538475	-0.291651
P300.PCAF	AC/OPC versus MES/NPC	0.205017	0.538475	-0.201623
ETS1	AC/OPC versus MES/NPC	0.205709	0.538475	-0.218896
PSENEN	AC/OPC versus MES/NPC	0.205969	0.538475	-0.130133
VDR	AC/OPC versus MES/NPC	0.208149	0.538475	-0.190901
PPM1A	AC/OPC versus MES/NPC	0.2085	0.538475	-0.187432
AHR.ARNT	AC/OPC versus MES/NPC	0.209282	0.538475	-0.224738
NKX3.1	AC/OPC versus MES/NPC	0.209635	0.538475	0.177977
CDK7	AC/OPC versus MES/NPC	0.211116	0.539634	0.195125
PGR	AC/OPC versus MES/NPC	0.21236	0.540177	-0.124477
FAS	AC/OPC versus MES/NPC	0.217526	0.550645	-0.0916313
TYK2	AC/OPC versus MES/NPC	0.225179	0.564639	-0.101118
MAFF	AC/OPC versus MES/NPC	0.225209	0.564639	-0.215395
SDC4	AC/OPC versus MES/NPC	0.227258	0.567063	0.175102
IL10RA	AC/OPC versus MES/NPC	0.228367	0.56713	-0.0667654
FOXP3	AC/OPC versus MES/NPC	0.230095	0.568726	0.161226
SETDB1.NLK.CHD7	AC/OPC versus MES/NPC	0.23251	0.569556	-0.254867
STK3	AC/OPC versus MES/NPC	0.232605	0.569556	0.110613
MAPK11	AC/OPC versus MES/NPC	0.244892	0.591063	-0.153341
RPS6KA2	AC/OPC versus MES/NPC	0.244937	0.591063	-0.189837
CRTC3	AC/OPC versus MES/NPC	0.246251	0.591063	0.178955
ATF2	AC/OPC versus MES/NPC	0.24786	0.591063	-0.0925218
GATA1	AC/OPC versus MES/NPC	0.248444	0.591063	0.177768
MAP2K6	AC/OPC versus MES/NPC	0.254132	0.591063	-0.11638
CBX3	AC/OPC versus MES/NPC	0.25461	0.591063	-0.196963
AKT	AC/OPC versus MES/NPC	0.254721	0.591063	-0.110413
ZNF217	AC/OPC versus MES/NPC	0.255148	0.591063	0.17042
SMAD3.SMAD4	AC/OPC versus MES/NPC	0.255424	0.591063	0.114998
AXIN1	AC/OPC versus MES/NPC	0.255622	0.591063	0.0963258
CAMKK2	AC/OPC versus MES/NPC	0.257151	0.591063	0.0972427
RARB	AC/OPC versus MES/NPC	0.258135	0.591063	-0.14799
NOTCH3	AC/OPC versus MES/NPC	0.258395	0.591063	-0.0878711
PBX1	AC/OPC versus MES/NPC	0.258985	0.591063	0.182248
AGTR1	AC/OPC versus MES/NPC	0.259436	0.591063	0.0888099
NR1H3	AC/OPC versus MES/NPC	0.260994	0.592039	-0.173771
JDP2	AC/OPC versus MES/NPC	0.263234	0.592271	-0.167746
PPP1CC	AC/OPC versus MES/NPC	0.263357	0.592271	0.255604
CDX2	AC/OPC versus MES/NPC	0.266951	0.595351	0.137161
FBXW7	AC/OPC versus MES/NPC	0.266999	0.595351	0.17721
BTK	AC/OPC versus MES/NPC	0.268189	0.59547	-0.115648
JAG2	AC/OPC versus MES/NPC	0.273123	0.601619	-0.0837133
STAT2	AC/OPC versus MES/NPC	0.273627	0.601619	0.127857
NfKb.p65.p50	AC/OPC versus MES/NPC	0.275354	0.601619	-0.112402
PTPRC	AC/OPC versus MES/NPC	0.276391	0.601619	0.0724011
EGR1	AC/OPC versus MES/NPC	0.276699	0.601619	-0.160298
TRAF1	AC/OPC versus MES/NPC	0.278356	0.60272	-0.0819899
ATF1	AC/OPC versus MES/NPC	0.279825	0.603408	-0.10341
NCOA1	AC/OPC versus MES/NPC	0.281786	0.605101	-0.135613
PTCRA	AC/OPC versus MES/NPC	0.283947	0.605101	0.0788641
APEX1	AC/OPC versus MES/NPC	0.287012	0.605101	-0.138677
DVL3	AC/OPC versus MES/NPC	0.287973	0.605101	-0.153095
PPP1R15A	AC/OPC versus MES/NPC	0.288073	0.605101	0.17612
KLF1	AC/OPC versus MES/NPC	0.288185	0.605101	-0.160515
E4F1	AC/OPC versus MES/NPC	0.289407	0.605101	-0.225299
NUAK1	AC/OPC versus MES/NPC	0.289848	0.605101	-0.127751
FGFR1	AC/OPC versus MES/NPC	0.291527	0.606171	-0.0766121
MAFA	AC/OPC versus MES/NPC	0.292674	0.606171	0.129037
ELF1	AC/OPC versus MES/NPC	0.294633	0.607826	0.23056
MAF	AC/OPC versus MES/NPC	0.299535	0.61366	-0.116206
FGFR4	AC/OPC versus MES/NPC	0.299804	0.61366	-0.0693433
PTEN	AC/OPC versus MES/NPC	0.301845	0.615097	-0.0995836
MAP3K11	AC/OPC versus MES/NPC	0.30354	0.615097	-0.10213
ROCK1	AC/OPC versus MES/NPC	0.304984	0.615097	0.151884
TFDP1	AC/OPC versus MES/NPC	0.305201	0.615097	-0.157748
p38	AC/OPC versus MES/NPC	0.307416	0.616259	-0.176716
BCL3	AC/OPC versus MES/NPC	0.308129	0.616259	0.161085
BCAR1	AC/OPC versus MES/NPC	0.311458	0.619754	0.0858728
ZFYVE9	AC/OPC versus MES/NPC	0.312242	0.619754	0.117084
PPP3CA	AC/OPC versus MES/NPC	0.314118	0.621125	0.104208
RBBP5	AC/OPC versus MES/NPC	0.316601	0.62368	0.156862
MAZ	AC/OPC versus MES/NPC	0.32007	0.626121	-0.146453
PAX3	AC/OPC versus MES/NPC	0.320758	0.626121	0.19737
SKI	AC/OPC versus MES/NPC	0.32279	0.626121	-0.121925
DDX5	AC/OPC versus MES/NPC	0.323775	0.626121	-0.15711
ARNT	AC/OPC versus MES/NPC	0.324412	0.626121	-0.156123
RUNX1	AC/OPC versus MES/NPC	0.325009	0.626121	-0.111004
SP1	AC/OPC versus MES/NPC	0.329045	0.629056	-0.0704276
RET	AC/OPC versus MES/NPC	0.329656	0.629056	-0.0404843
GNG12	AC/OPC versus MES/NPC	0.330134	0.629056	0.0845573
DLL3	AC/OPC versus MES/NPC	0.333342	0.632866	-0.0621713
YWHAZ	AC/OPC versus MES/NPC	0.336869	0.637253	0.075014
IGF1R	AC/OPC versus MES/NPC	0.341125	0.642983	-0.0654135
AURKB	AC/OPC versus MES/NPC	0.34292	0.644051	-0.128508
TGFBR1	AC/OPC versus MES/NPC	0.353834	0.660513	-0.0551298
AURKA	AC/OPC versus MES/NPC	0.354206	0.660513	0.0987819
MDM2	AC/OPC versus MES/NPC	0.356396	0.66154	-0.10183
ILF3	AC/OPC versus MES/NPC	0.357282	0.66154	-0.107614
MAPK9	AC/OPC versus MES/NPC	0.359563	0.66342	-0.0898012
NR3C1	AC/OPC versus MES/NPC	0.365008	0.667254	0.0577384
HSF2	AC/OPC versus MES/NPC	0.365264	0.667254	0.202781
IL1R1	AC/OPC versus MES/NPC	0.365462	0.667254	-0.0544894
CIITA	AC/OPC versus MES/NPC	0.367399	0.668463	-0.0803104
PLCG1	AC/OPC versus MES/NPC	0.372801	0.675944	-0.0670353
MEIS1	AC/OPC versus MES/NPC	0.376739	0.680728	-0.181872
ATF4	AC/OPC versus MES/NPC	0.384239	0.691894	0.115428
DNMT1	AC/OPC versus MES/NPC	0.385795	0.692318	0.0720553
NR2F1	AC/OPC versus MES/NPC	0.387148	0.692374	-0.1456
RXRB	AC/OPC versus MES/NPC	0.392417	0.699394	-0.134967
PPP2CA	AC/OPC versus MES/NPC	0.394719	0.699394	0.146579
SIK1	AC/OPC versus MES/NPC	0.395697	0.699394	0.114934
TLR4	AC/OPC versus MES/NPC	0.397274	0.699394	-0.0617994
CYLD	AC/OPC versus MES/NPC	0.398644	0.699394	0.106938
PAK1	AC/OPC versus MES/NPC	0.399082	0.699394	0.0851722
SMAD3	AC/OPC versus MES/NPC	0.40411	0.705845	0.0542869
ERBB4	AC/OPC versus MES/NPC	0.406147	0.707047	-0.0820382
PRKAA2	AC/OPC versus MES/NPC	0.411954	0.710879	0.137103
RELA	AC/OPC versus MES/NPC	0.412212	0.710879	-0.0590029
X14.3.3	AC/OPC versus MES/NPC	0.412418	0.710879	0.0917857
CALM1	AC/OPC versus MES/NPC	0.41897	0.719503	-0.067332
HOXA9	AC/OPC versus MES/NPC	0.420168	0.719503	-0.126904
HMGA1	AC/OPC versus MES/NPC	0.428449	0.728913	0.0782067
MYCN	AC/OPC versus MES/NPC	0.429195	0.728913	-0.118896
DAB1	AC/OPC versus MES/NPC	0.432449	0.728913	0.11852
NFY	AC/OPC versus MES/NPC	0.434047	0.728913	0.131798
FOXA2	AC/OPC versus MES/NPC	0.435754	0.728913	0.129991
RIPK1	AC/OPC versus MES/NPC	0.436495	0.728913	0.0884869
MYC	AC/OPC versus MES/NPC	0.436814	0.728913	-0.0752494
PDGFRA	AC/OPC versus MES/NPC	0.437893	0.728913	0.0556546
CyclinD.CDK4	AC/OPC versus MES/NPC	0.438183	0.728913	0.0884743
GSK3A	AC/OPC versus MES/NPC	0.439845	0.729364	-0.104956
RPS6KA5	AC/OPC versus MES/NPC	0.442886	0.729993	-0.0847481
ADAM17	AC/OPC versus MES/NPC	0.443954	0.729993	-0.0517217
SOX9	AC/OPC versus MES/NPC	0.444404	0.729993	-0.114602
SMARCA4	AC/OPC versus MES/NPC	0.447805	0.732032	0.0763383
DCX.DET1.COP1	AC/OPC versus MES/NPC	0.448439	0.732032	0.159365
MAPK14	AC/OPC versus MES/NPC	0.453662	0.736271	-0.0657132
MAPK15	AC/OPC versus MES/NPC	0.453846	0.736271	0.111818
TRAF3	AC/OPC versus MES/NPC	0.455374	0.736469	0.0777821
JAK3	AC/OPC versus MES/NPC	0.459075	0.739556	0.0809144
WWTR1	AC/OPC versus MES/NPC	0.460106	0.739556	0.0974186
MTOR	AC/OPC versus MES/NPC	0.465122	0.741886	-0.0660723
TAL1	AC/OPC versus MES/NPC	0.46665	0.741886	0.0801123
SFN	AC/OPC versus MES/NPC	0.466956	0.741886	-0.0911609
PRMT5	AC/OPC versus MES/NPC	0.467219	0.741886	-0.0833744
SUZ12	AC/OPC versus MES/NPC	0.469111	0.742641	0.176898
PTPN2	AC/OPC versus MES/NPC	0.473015	0.746566	-0.102559
IKBKB	AC/OPC versus MES/NPC	0.479128	0.753942	-0.0786481
TJP2	AC/OPC versus MES/NPC	0.490044	0.76254	0.0550931
PRKACA	AC/OPC versus MES/NPC	0.490085	0.76254	-0.0905931
KRAS	AC/OPC versus MES/NPC	0.490138	0.76254	0.117087
MXI1	AC/OPC versus MES/NPC	0.490412	0.76254	-0.12182
SIRT1	AC/OPC versus MES/NPC	0.501028	0.776741	-0.0937597
PTPN11	AC/OPC versus MES/NPC	0.507552	0.781051	-0.0475489
ROBO	AC/OPC versus MES/NPC	0.510094	0.781051	-0.132476
ESR2	AC/OPC versus MES/NPC	0.510984	0.781051	-0.0541167
WT1	AC/OPC versus MES/NPC	0.51536	0.781051	-0.109558
PDPK1	AC/OPC versus MES/NPC	0.517408	0.781051	0.0549415
TP53RK	AC/OPC versus MES/NPC	0.517496	0.781051	-0.0787688
FADD	AC/OPC versus MES/NPC	0.520048	0.781051	-0.0670915
FYN	AC/OPC versus MES/NPC	0.520148	0.781051	0.0545388
FOXO4	AC/OPC versus MES/NPC	0.521488	0.781051	-0.051277
DLL4	AC/OPC versus MES/NPC	0.522531	0.781051	-0.0415774
GNAQ	AC/OPC versus MES/NPC	0.524745	0.781051	0.0735991
PPP1CA	AC/OPC versus MES/NPC	0.526367	0.781051	-0.0679844
TNFRSF1B	AC/OPC versus MES/NPC	0.533062	0.781051	0.0452776
SGK3	AC/OPC versus MES/NPC	0.533556	0.781051	-0.0894687
SUZ12.EZH2	AC/OPC versus MES/NPC	0.533952	0.781051	-0.10741
RBPJ	AC/OPC versus MES/NPC	0.533953	0.781051	0.0557076
AKT3	AC/OPC versus MES/NPC	0.534537	0.781051	0.100818
MAX	AC/OPC versus MES/NPC	0.536147	0.781051	-0.0827942
REST	AC/OPC versus MES/NPC	0.536382	0.781051	0.0970541
PHB2	AC/OPC versus MES/NPC	0.538625	0.781051	-0.074877
MYOCD	AC/OPC versus MES/NPC	0.539281	0.781051	0.0810556
JUN	AC/OPC versus MES/NPC	0.539307	0.781051	-0.0452218
FOXO3	AC/OPC versus MES/NPC	0.540851	0.781051	-0.0456497
MYOD1	AC/OPC versus MES/NPC	0.540996	0.781051	0.0348833
FOS	AC/OPC versus MES/NPC	0.541072	0.781051	0.0592435
SGK2	AC/OPC versus MES/NPC	0.542649	0.781176	0.0854804
BTRC	AC/OPC versus MES/NPC	0.547217	0.785594	0.106577
EWSR1	AC/OPC versus MES/NPC	0.550658	0.788373	-0.0515661
IL6ST	AC/OPC versus MES/NPC	0.558872	0.797953	0.034896
BORA	AC/OPC versus MES/NPC	0.56365	0.801097	-0.0592019
CHEK2	AC/OPC versus MES/NPC	0.564131	0.801097	0.0842399
ERK1.2	AC/OPC versus MES/NPC	0.568658	0.805342	-0.0511741
PSEN1	AC/OPC versus MES/NPC	0.571877	0.807719	0.0327689
BMI1	AC/OPC versus MES/NPC	0.5747	0.809524	-0.0570271
NR4A2	AC/OPC versus MES/NPC	0.590632	0.829734	-0.0938751
PRDM1	AC/OPC versus MES/NPC	0.593166	0.82984	-0.0851466
RYK	AC/OPC versus MES/NPC	0.593874	0.82984	-0.0908684
PPP2R5C	AC/OPC versus MES/NPC	0.601178	0.837264	-0.065519
PTPN1	AC/OPC versus MES/NPC	0.605492	0.837264	-0.0475131
PRC2	AC/OPC versus MES/NPC	0.606419	0.837264	-0.0873918
MEF2D	AC/OPC versus MES/NPC	0.607059	0.837264	-0.0805301
LYN	AC/OPC versus MES/NPC	0.609945	0.837264	0.0563892
LAT	AC/OPC versus MES/NPC	0.610245	0.837264	-0.041716
RUNX3	AC/OPC versus MES/NPC	0.610372	0.837264	0.0723096
GNA13	AC/OPC versus MES/NPC	0.61556	0.842175	0.05477
CREBBP	AC/OPC versus MES/NPC	0.618972	0.842178	0.0415232
TCF7	AC/OPC versus MES/NPC	0.619	0.842178	0.0464123
CUL4A	AC/OPC versus MES/NPC	0.620383	0.842178	0.109951
GATA6	AC/OPC versus MES/NPC	0.626324	0.848044	-0.0830214
IKBKE	AC/OPC versus MES/NPC	0.627941	0.848044	-0.109587
mTORC1	AC/OPC versus MES/NPC	0.629853	0.848439	0.0557437
LRP6	AC/OPC versus MES/NPC	0.63223	0.849458	0.0337859
GLI2	AC/OPC versus MES/NPC	0.640365	0.858187	0.0424934
FOXM1	AC/OPC versus MES/NPC	0.644929	0.862099	-0.0562203
GABARAP	AC/OPC versus MES/NPC	0.651175	0.868233	-0.0353167
MAPK12	AC/OPC versus MES/NPC	0.657964	0.869909	-0.0655653
RFX.complex	AC/OPC versus MES/NPC	0.658965	0.869909	-0.0648136
SMO	AC/OPC versus MES/NPC	0.65971	0.869909	0.0300277
NFYB	AC/OPC versus MES/NPC	0.660565	0.869909	0.0720813
Calcineurin	AC/OPC versus MES/NPC	0.660733	0.869909	-0.055435
YWHAB	AC/OPC versus MES/NPC	0.666187	0.874892	0.04295
PTK2	AC/OPC versus MES/NPC	0.668983	0.876368	-0.0331641
JAG1	AC/OPC versus MES/NPC	0.671746	0.877792	-0.0295589
CDKN1A	AC/OPC versus MES/NPC	0.674827	0.879625	-0.0334321
NR2F2	AC/OPC versus MES/NPC	0.678973	0.880803	-0.0675587
PIAS1	AC/OPC versus MES/NPC	0.679092	0.880803	-0.0496217
CSNK1A1	AC/OPC versus MES/NPC	0.682552	0.882476	-0.0641315
SRC	AC/OPC versus MES/NPC	0.68447	0.882476	0.0397435
MEK1.2	AC/OPC versus MES/NPC	0.688441	0.882476	0.0390456
MAPK13	AC/OPC versus MES/NPC	0.689031	0.882476	-0.065287
GSK3B	AC/OPC versus MES/NPC	0.690196	0.882476	-0.0360112
STK11	AC/OPC versus MES/NPC	0.691457	0.882476	0.0364639
HAND1	AC/OPC versus MES/NPC	0.692171	0.882476	0.0481784
CAMKK1	AC/OPC versus MES/NPC	0.695296	0.884309	-0.0507479
DLX5	AC/OPC versus MES/NPC	0.699707	0.88503	-0.0452059
CCND1	AC/OPC versus MES/NPC	0.699911	0.88503	0.0377738
BAD	AC/OPC versus MES/NPC	0.70093	0.88503	-0.0350621
POU5F1	AC/OPC versus MES/NPC	0.703667	0.88635	0.0249682
CRL4.CRBN.	AC/OPC versus MES/NPC	0.705531	0.886567	0.0811229
SOX2	AC/OPC versus MES/NPC	0.7138	0.894812	0.0384618
LCK	AC/OPC versus MES/NPC	0.717329	0.897089	0.0328014
CyclinB.CDK1	AC/OPC versus MES/NPC	0.727329	0.907429	-0.0408644
MAP2K2	AC/OPC versus MES/NPC	0.729899	0.908473	0.0433139
PIK3CA	AC/OPC versus MES/NPC	0.736715	0.913626	0.0319431
HDAC6	AC/OPC versus MES/NPC	0.737527	0.913626	-0.0326429
UBTF	AC/OPC versus MES/NPC	0.739581	0.914011	0.0379113
MAP3K1	AC/OPC versus MES/NPC	0.743058	0.915226	-0.0316018
DDB1	AC/OPC versus MES/NPC	0.744058	0.915226	-0.0530222
RPS6KA3	AC/OPC versus MES/NPC	0.74662	0.915318	-0.0285857
MYB	AC/OPC versus MES/NPC	0.74826	0.915318	0.0334729
HSP90AA1	AC/OPC versus MES/NPC	0.751852	0.915318	0.0581371
PPP3CC	AC/OPC versus MES/NPC	0.753665	0.915318	0.0318549
NFATC1	AC/OPC versus MES/NPC	0.753976	0.915318	0.0244897
MYOD1.SWI.SNF.complex	AC/OPC versus MES/NPC	0.754614	0.915318	-0.0317618
NAE	AC/OPC versus MES/NPC	0.761178	0.919798	0.0504618
PRKD1	AC/OPC versus MES/NPC	0.764048	0.919798	-0.0342479
REL	AC/OPC versus MES/NPC	0.765197	0.919798	-0.0663184
GLI3	AC/OPC versus MES/NPC	0.765328	0.919798	-0.0273612
NOS1	AC/OPC versus MES/NPC	0.770912	0.924389	-0.0483799
GATA3	AC/OPC versus MES/NPC	0.773716	0.925633	-0.0349015
RPS6KB1	AC/OPC versus MES/NPC	0.77631	0.926621	-0.0242099
PRKCZ	AC/OPC versus MES/NPC	0.782872	0.928403	0.0415601
PRKCQ	AC/OPC versus MES/NPC	0.787581	0.928403	0.0250224
SRY	AC/OPC versus MES/NPC	0.78857	0.928403	-0.0493975
HTT	AC/OPC versus MES/NPC	0.789829	0.928403	0.0228739
PPP3CB	AC/OPC versus MES/NPC	0.789994	0.928403	-0.0285224
GATA2	AC/OPC versus MES/NPC	0.79044	0.928403	0.0367403
PRKCB	AC/OPC versus MES/NPC	0.790891	0.928403	-0.0381033
EED	AC/OPC versus MES/NPC	0.791978	0.928403	0.0547751
Myog.SWI.SNF.complex	AC/OPC versus MES/NPC	0.794862	0.929704	-0.0507752
PPARA	AC/OPC versus MES/NPC	0.80309	0.936005	-0.0326384
CDK6	AC/OPC versus MES/NPC	0.807422	0.936005	-0.0318208
TFEB	AC/OPC versus MES/NPC	0.809409	0.936005	-0.0238342
APP	AC/OPC versus MES/NPC	0.809941	0.936005	0.016751
MSX1	AC/OPC versus MES/NPC	0.81234	0.936005	0.0369139
YY1	AC/OPC versus MES/NPC	0.812707	0.936005	-0.0304679
PTPN6	AC/OPC versus MES/NPC	0.812753	0.936005	-0.0265665
PARD6.SMURF1	AC/OPC versus MES/NPC	0.814774	0.936275	0.0409112
MAPK7	AC/OPC versus MES/NPC	0.823487	0.94024	0.0454403
TRAF2	AC/OPC versus MES/NPC	0.827183	0.94024	-0.0170134
RANBP3	AC/OPC versus MES/NPC	0.827671	0.94024	0.0260714
AKT2	AC/OPC versus MES/NPC	0.829464	0.94024	0.0285417
PRKCI	AC/OPC versus MES/NPC	0.830705	0.94024	0.0310421
NFKB1	AC/OPC versus MES/NPC	0.834198	0.94024	0.0167299
TP63	AC/OPC versus MES/NPC	0.835678	0.94024	-0.0187907
IFNGR2.INFGR1	AC/OPC versus MES/NPC	0.836202	0.94024	-0.0117607
MITF	AC/OPC versus MES/NPC	0.836211	0.94024	0.0231566
NAE1	AC/OPC versus MES/NPC	0.838248	0.94024	-0.020645
FOSL1	AC/OPC versus MES/NPC	0.840308	0.94024	-0.0415409
PARD6A	AC/OPC versus MES/NPC	0.841328	0.94024	-0.0228405
CHEK1	AC/OPC versus MES/NPC	0.845044	0.94024	0.0185673
CDK4	AC/OPC versus MES/NPC	0.846258	0.94024	-0.0215269
SUFU	AC/OPC versus MES/NPC	0.847566	0.94024	-0.0197447
IKBKG	AC/OPC versus MES/NPC	0.851093	0.94024	-0.0227984
E2F1	AC/OPC versus MES/NPC	0.85112	0.94024	-0.0225905
SYK	AC/OPC versus MES/NPC	0.851464	0.94024	0.0237174
PIN1	AC/OPC versus MES/NPC	0.852317	0.94024	-0.0221749
KIF7	AC/OPC versus MES/NPC	0.856199	0.942538	0.0195026
POLR2A	AC/OPC versus MES/NPC	0.859453	0.944137	-0.0269412
IKZF1	AC/OPC versus MES/NPC	0.866556	0.949949	-0.0190636
LATS2	AC/OPC versus MES/NPC	0.870835	0.950672	-0.0184331
SNAI1	AC/OPC versus MES/NPC	0.870845	0.950672	-0.013022
TGFBR2	AC/OPC versus MES/NPC	0.874574	0.952759	-0.0122375
BCR.ABL.fusion	AC/OPC versus MES/NPC	0.882039	0.958897	-0.0221431
CASP8AP2	AC/OPC versus MES/NPC	0.884909	0.960026	0.0167791
PKN1	AC/OPC versus MES/NPC	0.888769	0.962221	0.0209391
VAV1	AC/OPC versus MES/NPC	0.894993	0.96368	0.0154169
PLK1	AC/OPC versus MES/NPC	0.895316	0.96368	0.0201503
HSF1	AC/OPC versus MES/NPC	0.8969	0.96368	-0.0102858
CDK3	AC/OPC versus MES/NPC	0.897473	0.96368	0.0162854
TBX3	AC/OPC versus MES/NPC	0.900269	0.964245	0.0185196
NUMB	AC/OPC versus MES/NPC	0.901679	0.964245	0.0164743
TNFRSF13C	AC/OPC versus MES/NPC	0.910577	0.971108	0.00837035
ITCH	AC/OPC versus MES/NPC	0.911985	0.971108	0.0112142
MYOG	AC/OPC versus MES/NPC	0.913657	0.971108	-0.015768
IRF7	AC/OPC versus MES/NPC	0.920889	0.973565	0.0142599
LRP5	AC/OPC versus MES/NPC	0.921103	0.973565	0.00772117
PPARGC1A	AC/OPC versus MES/NPC	0.922844	0.973565	0.00814988
RFXANK	AC/OPC versus MES/NPC	0.9234	0.973565	-0.0136527
TBP	AC/OPC versus MES/NPC	0.927447	0.975868	-0.0155871
SRF	AC/OPC versus MES/NPC	0.932248	0.978954	-0.00889023
MAPK10	AC/OPC versus MES/NPC	0.940888	0.98605	0.00721167
JNK	AC/OPC versus MES/NPC	0.943207	0.986508	-0.0105495
CEBPB	AC/OPC versus MES/NPC	0.946424	0.987901	0.00514158
E2F3	AC/OPC versus MES/NPC	0.953019	0.990766	0.00824136
STAT5B	AC/OPC versus MES/NPC	0.959717	0.990766	0.00378779
HRAS	AC/OPC versus MES/NPC	0.962962	0.990766	-0.00429054
PTPRR	AC/OPC versus MES/NPC	0.963217	0.990766	-0.00824643
CHUK	AC/OPC versus MES/NPC	0.964715	0.990766	-0.0055811
STAT4	AC/OPC versus MES/NPC	0.966897	0.990766	-0.00384884
INSR	AC/OPC versus MES/NPC	0.968575	0.990766	0.00285566
CDKN2A	AC/OPC versus MES/NPC	0.971248	0.990766	0.00589615
JAK1	AC/OPC versus MES/NPC	0.973255	0.990766	-0.0025099
USF1	AC/OPC versus MES/NPC	0.974295	0.990766	-0.00550378
RFX5	AC/OPC versus MES/NPC	0.974515	0.990766	0.00428822
PAX6	AC/OPC versus MES/NPC	0.974569	0.990766	-0.00339448
SMAD4	AC/OPC versus MES/NPC	0.975652	0.990766	0.00245953
STK4	AC/OPC versus MES/NPC	0.976051	0.990766	0.0026449
SMC3	AC/OPC versus MES/NPC	0.978004	0.990766	0.00352096
STAT1	AC/OPC versus MES/NPC	0.982036	0.990766	-0.0014892
NFKBIA	AC/OPC versus MES/NPC	0.983175	0.990766	-0.00189682
LTBR	AC/OPC versus MES/NPC	0.983203	0.990766	0.00159752
MAP2K1	AC/OPC versus MES/NPC	0.990336	0.996039	-0.00114829
RORA	AC/OPC versus MES/NPC	0.995253	0.99882	0.000665888
DLK1	AC/OPC versus MES/NPC	0.996914	0.99882	0.000263152
CXCL1	AC/OPC versus MES/NPC	0.999351	0.999351	-8.97488e-05
LEF1	MES/AC versus OPC/NPC	1.27501e-13	6.68107e-11	0.612559
CyclinE.CDK2	MES/AC versus OPC/NPC	7.36694e-08	1.70111e-05	0.875931
CRL4.CRBN.	MES/AC versus OPC/NPC	9.7392e-08	1.70111e-05	-1.16419
DCX.DET1.COP1	MES/AC versus OPC/NPC	1.6567e-07	1.94156e-05	-1.11857
TP53	MES/AC versus OPC/NPC	1.85264e-07	1.94156e-05	0.333455
P300.PCAF	MES/AC versus OPC/NPC	4.60556e-07	4.02219e-05	0.814304
TP53RK	MES/AC versus OPC/NPC	3.96944e-06	0.000285326	0.569237
NCOR1	MES/AC versus OPC/NPC	4.35613e-06	0.000285326	0.554868
CUL4A	MES/AC versus OPC/NPC	6.63606e-06	0.000380134	-1.01362
DDB1	MES/AC versus OPC/NPC	7.34228e-06	0.000380134	-0.738003
DUSP6	MES/AC versus OPC/NPC	9.04478e-06	0.000380134	0.561019
DLX5	MES/AC versus OPC/NPC	9.20278e-06	0.000380134	0.52673
MAFK	MES/AC versus OPC/NPC	9.91098e-06	0.000380134	-0.79117
MKL1	MES/AC versus OPC/NPC	1.01562e-05	0.000380134	0.556016
PPP2R5C	MES/AC versus OPC/NPC	1.28516e-05	0.000448948	0.553953
SCF.FBW7	MES/AC versus OPC/NPC	1.78959e-05	0.000573764	-0.979819
SCF.SKP2	MES/AC versus OPC/NPC	1.86145e-05	0.000573764	-0.987266
MAP3K14	MES/AC versus OPC/NPC	2.01531e-05	0.000586678	-0.424119
PRKAA1	MES/AC versus OPC/NPC	2.90347e-05	0.000800746	0.593045
HSF2	MES/AC versus OPC/NPC	3.07921e-05	0.000806754	-0.944683
CEBPB	MES/AC versus OPC/NPC	4.09412e-05	0.000978908	0.317694
THRB	MES/AC versus OPC/NPC	4.27064e-05	0.000978908	0.532521
TCF12	MES/AC versus OPC/NPC	4.29673e-05	0.000978908	-0.682303
EP300	MES/AC versus OPC/NPC	4.71601e-05	0.000992427	0.270246
PHB2	MES/AC versus OPC/NPC	4.93737e-05	0.000992427	0.500092
NR4A2	MES/AC versus OPC/NPC	4.94529e-05	0.000992427	0.716653
SCF.betaTRCP	MES/AC versus OPC/NPC	5.11365e-05	0.000992427	-0.948074
RPS6KA2	MES/AC versus OPC/NPC	5.9431e-05	0.00108059	0.662945
MAPK1	MES/AC versus OPC/NPC	6.09865e-05	0.00108059	0.341606
NUAK1	MES/AC versus OPC/NPC	6.18659e-05	0.00108059	0.488957
MYB	MES/AC versus OPC/NPC	6.51594e-05	0.00109859	0.421397
MAFF	MES/AC versus OPC/NPC	6.78032e-05	0.00109859	-0.715439
GSK3B	MES/AC versus OPC/NPC	6.9424e-05	0.00109859	0.363626
NCOA3	MES/AC versus OPC/NPC	7.12826e-05	0.00109859	-0.224507
ILF3	MES/AC versus OPC/NPC	7.73961e-05	0.00115873	0.467258
POU5F1	MES/AC versus OPC/NPC	8.47952e-05	0.0012022	0.260975
CUL3	MES/AC versus OPC/NPC	8.48884e-05	0.0012022	-0.884376
CSNK1A1	MES/AC versus OPC/NPC	9.3149e-05	0.00127506	-0.619785
AKT1	MES/AC versus OPC/NPC	9.70085e-05	0.00127506	0.342203
CUL1	MES/AC versus OPC/NPC	9.7333e-05	0.00127506	-0.903235
PPARA	MES/AC versus OPC/NPC	0.00010049	0.00128431	0.514922
CTNNB1	MES/AC versus OPC/NPC	0.000105846	0.00130965	0.214338
RELA	MES/AC versus OPC/NPC	0.000107471	0.00130965	0.281783
EZH2	MES/AC versus OPC/NPC	0.000147506	0.00175612	0.269845
CHUK	MES/AC versus OPC/NPC	0.000150812	0.00175612	0.483443
NCOA1	MES/AC versus OPC/NPC	0.000159311	0.00181476	0.48082
GTF2A2	MES/AC versus OPC/NPC	0.000167989	0.00186099	-0.502534
MAFG	MES/AC versus OPC/NPC	0.000170473	0.00186099	-0.673064
SP1	MES/AC versus OPC/NPC	0.000188142	0.00201197	0.272308
SKI	MES/AC versus OPC/NPC	0.000194602	0.00203943	0.464289
GATA6	MES/AC versus OPC/NPC	0.000199888	0.00205375	0.641
POU3F1	MES/AC versus OPC/NPC	0.000215602	0.00217261	-0.554387
GSK3A	MES/AC versus OPC/NPC	0.000221572	0.00219063	0.507097
SH3RF1	MES/AC versus OPC/NPC	0.000237871	0.00230823	0.459482
NR3C1	MES/AC versus OPC/NPC	0.000318393	0.00303342	0.231788
AKT	MES/AC versus OPC/NPC	0.000416687	0.003899	0.34548
MSX1	MES/AC versus OPC/NPC	0.000455115	0.00418386	0.550694
TNFRSF1B	MES/AC versus OPC/NPC	0.000647974	0.00585411	-0.250173
MLL2.complex	MES/AC versus OPC/NPC	0.000685559	0.00608869	-0.63692
SOX2	MES/AC versus OPC/NPC	0.000700635	0.00611888	0.358942
MLL.SET.subcomplex	MES/AC versus OPC/NPC	0.000739041	0.00629494	-0.624931
PGR	MES/AC versus OPC/NPC	0.000744821	0.00629494	0.339719
UBTF	MES/AC versus OPC/NPC	0.000944104	0.00785255	0.380759
APP	MES/AC versus OPC/NPC	0.00101203	0.00828597	-0.231148
TBP	MES/AC versus OPC/NPC	0.00111861	0.0090177	0.56317
MLL1.complex	MES/AC versus OPC/NPC	0.00125156	0.00993664	-0.535571
ULK1.Atg13.Fip200	MES/AC versus OPC/NPC	0.00128639	0.0100608	-0.587144
FOXA2	MES/AC versus OPC/NPC	0.00142235	0.0109605	0.536901
HIF1A	MES/AC versus OPC/NPC	0.00145211	0.0110277	0.282811
TP63	MES/AC versus OPC/NPC	0.00149165	0.011166	-0.290418
POLR2A	MES/AC versus OPC/NPC	0.00156444	0.011546	0.485626
RUNX2	MES/AC versus OPC/NPC	0.001763	0.0128307	-0.265909
ZEB1	MES/AC versus OPC/NPC	0.00179593	0.0128914	-0.56044
PRRX1	MES/AC versus OPC/NPC	0.00187663	0.0132886	-0.411077
MAPK3	MES/AC versus OPC/NPC	0.00195738	0.0136756	0.283165
PBX1	MES/AC versus OPC/NPC	0.00217676	0.0150082	-0.49905
HDAC1	MES/AC versus OPC/NPC	0.00223527	0.0150503	0.265109
SKIL	MES/AC versus OPC/NPC	0.00224031	0.0150503	-0.641052
RANBP3	MES/AC versus OPC/NPC	0.00234037	0.0155235	0.367731
CALM1	MES/AC versus OPC/NPC	0.00259696	0.0170058	-0.253073
NAE	MES/AC versus OPC/NPC	0.00262877	0.0170058	-0.503846
FHL2	MES/AC versus OPC/NPC	0.00277155	0.0177109	-0.654881
NFYB	MES/AC versus OPC/NPC	0.0030085	0.0189934	0.491226
STK3	MES/AC versus OPC/NPC	0.0031054	0.0193718	0.276253
REL	MES/AC versus OPC/NPC	0.00327548	0.0201923	-0.658627
PTEN	MES/AC versus OPC/NPC	0.00361208	0.0220085	0.282984
TGFBR1	MES/AC versus OPC/NPC	0.00368662	0.0222045	-0.174083
MYOCD	MES/AC versus OPC/NPC	0.00439301	0.0261584	0.379222
SREBF2	MES/AC versus OPC/NPC	0.0049979	0.0294258	0.362772
STK11	MES/AC versus OPC/NPC	0.00543219	0.0316274	0.257544
RHOA	MES/AC versus OPC/NPC	0.00567289	0.0326659	-0.400263
PKCtheta.Nfix	MES/AC versus OPC/NPC	0.00579064	0.0329815	-0.389174
NFY	MES/AC versus OPC/NPC	0.00645019	0.036343	0.462567
TBK1	MES/AC versus OPC/NPC	0.00661552	0.036878	-0.399709
Calcineurin	MES/AC versus OPC/NPC	0.00726794	0.0400884	-0.341754
PPP2CA	MES/AC versus OPC/NPC	0.00757733	0.040975	0.463464
RYK	MES/AC versus OPC/NPC	0.00758506	0.040975	-0.458609
IKBKE	MES/AC versus OPC/NPC	0.00791066	0.0422978	-0.605321
MDM2	MES/AC versus OPC/NPC	0.00815435	0.0431604	0.294347
PARD6.SMURF1	MES/AC versus OPC/NPC	0.00845481	0.0443032	-0.463522
RBPJ	MES/AC versus OPC/NPC	0.00859502	0.044592	-0.237189
FOXM1	MES/AC versus OPC/NPC	0.00891255	0.0455785	-0.321584
ULK1	MES/AC versus OPC/NPC	0.00895914	0.0455785	-0.505105
ERK1.2	MES/AC versus OPC/NPC	0.00913384	0.0460205	0.235863
KMT2D	MES/AC versus OPC/NPC	0.00957658	0.0477917	-0.489461
PRKCI	MES/AC versus OPC/NPC	0.0103345	0.0510877	0.375246
FRS2	MES/AC versus OPC/NPC	0.0109884	0.0536653	-0.172672
PAX7	MES/AC versus OPC/NPC	0.0110608	0.0536653	-0.344447
HSP90AB1	MES/AC versus OPC/NPC	0.0113115	0.0543782	0.40844
TBX3	MES/AC versus OPC/NPC	0.0117942	0.0561832	0.37501
STAT2	MES/AC versus OPC/NPC	0.0120696	0.0569163	-0.295268
CSNK1E	MES/AC versus OPC/NPC	0.0121653	0.0569163	-0.437205
RBBP5	MES/AC versus OPC/NPC	0.0149646	0.0693935	-0.383837
BAD	MES/AC versus OPC/NPC	0.0157228	0.0722697	0.222138
BTRC	MES/AC versus OPC/NPC	0.0159294	0.0725825	-0.429936
CyclinD.CDK4	MES/AC versus OPC/NPC	0.0162033	0.073194	0.276366
HMT	MES/AC versus OPC/NPC	0.0166762	0.0746864	-0.464888
NFATC1	MES/AC versus OPC/NPC	0.0169387	0.0752192	-0.187988
DVL3	MES/AC versus OPC/NPC	0.0172862	0.0761175	-0.345375
CCND1	MES/AC versus OPC/NPC	0.0178609	0.0773386	0.233822
MAPK9	MES/AC versus OPC/NPC	0.0179977	0.0773386	0.233506
FAS	MES/AC versus OPC/NPC	0.0180063	0.0773386	-0.176963
RPS6KA5	MES/AC versus OPC/NPC	0.0184492	0.0785967	0.26212
ETS1	MES/AC versus OPC/NPC	0.0187904	0.0794048	0.409162
JUN	MES/AC versus OPC/NPC	0.0189636	0.0794952	0.174089
AHR	MES/AC versus OPC/NPC	0.0194642	0.0809462	0.412998
TLRs	MES/AC versus OPC/NPC	0.0197774	0.080986	-0.165588
mTORC1	MES/AC versus OPC/NPC	0.0197828	0.080986	-0.271505
CyclinB.CDK1	MES/AC versus OPC/NPC	0.0200163	0.0813064	-0.274589
CASP8AP2	MES/AC versus OPC/NPC	0.0210106	0.0846889	-0.269466
CEBPD	MES/AC versus OPC/NPC	0.0215924	0.0863697	-0.403477
NAE1	MES/AC versus OPC/NPC	0.0217796	0.0864582	-0.233702
MITF	MES/AC versus OPC/NPC	0.0220191	0.086752	0.258357
CDK5	MES/AC versus OPC/NPC	0.0232988	0.0911087	0.25093
TRAF2	MES/AC versus OPC/NPC	0.0240636	0.0934026	-0.17708
SRC	MES/AC versus OPC/NPC	0.0250529	0.0965273	0.220686
CHEK1	MES/AC versus OPC/NPC	0.0259314	0.0986378	0.213094
NFYA	MES/AC versus OPC/NPC	0.0259771	0.0986378	0.333706
NFKBIA	MES/AC versus OPC/NPC	0.0266374	0.100417	0.200808
ATF2	MES/AC versus OPC/NPC	0.0304176	0.113849	-0.174431
ERBB4	MES/AC versus OPC/NPC	0.0315966	0.117423	-0.213702
KLF4	MES/AC versus OPC/NPC	0.0321329	0.118575	0.226558
PRKCE	MES/AC versus OPC/NPC	0.0323828	0.118662	0.232027
GLI3	MES/AC versus OPC/NPC	0.0330001	0.11952	0.19679
GATA1	MES/AC versus OPC/NPC	0.0330733	0.11952	0.33036
SKP2	MES/AC versus OPC/NPC	0.033429	0.119978	0.323083
ADAM17	MES/AC versus OPC/NPC	0.0337173	0.120118	-0.144426
CASP3	MES/AC versus OPC/NPC	0.0339264	0.120118	0.338939
MYBL1	MES/AC versus OPC/NPC	0.0349608	0.122949	-0.283757
JDP2	MES/AC versus OPC/NPC	0.03555	0.124188	0.317182
MEIS1	MES/AC versus OPC/NPC	0.0380793	0.132143	-0.429523
CAMKK1	MES/AC versus OPC/NPC	0.039494	0.13615	-0.268581
AGTR1	MES/AC versus OPC/NPC	0.0413719	0.140817	-0.161641
RPS6KA3	MES/AC versus OPC/NPC	0.0414848	0.140817	0.181584
POU2F1	MES/AC versus OPC/NPC	0.0416537	0.140817	0.331441
GATA3	MES/AC versus OPC/NPC	0.0423408	0.142222	0.248102
MAPK10	MES/AC versus OPC/NPC	0.0429213	0.143046	0.198218
IGF1R	MES/AC versus OPC/NPC	0.0431746	0.143046	-0.139831
TICAM1	MES/AC versus OPC/NPC	0.0434051	0.143046	-0.175028
SIRT1	MES/AC versus OPC/NPC	0.0456713	0.149574	0.280284
PARD6A	MES/AC versus OPC/NPC	0.0473649	0.154157	-0.227757
PPP3CB	MES/AC versus OPC/NPC	0.0491562	0.158945	-0.212088
BMPR1A	MES/AC versus OPC/NPC	0.0494428	0.158945	-0.268114
CDK7	MES/AC versus OPC/NPC	0.0504305	0.161132	0.307086
TRIM28	MES/AC versus OPC/NPC	0.0514202	0.162742	-0.338214
JAK2	MES/AC versus OPC/NPC	0.0515556	0.162742	0.140126
RET	MES/AC versus OPC/NPC	0.0535258	0.167949	0.0806793
IL1R1	MES/AC versus OPC/NPC	0.0551357	0.171971	0.11619
PIAS1	MES/AC versus OPC/NPC	0.055916	0.173373	0.230792
DAB1	MES/AC versus OPC/NPC	0.0566861	0.174727	0.289541
STAT5A	MES/AC versus OPC/NPC	0.0570439	0.174801	0.118761
FADD	MES/AC versus OPC/NPC	0.0582334	0.176835	-0.198793
GATA2	MES/AC versus OPC/NPC	0.0586391	0.176835	0.263133
MAPK12	MES/AC versus OPC/NPC	0.0587201	0.176835	-0.281751
FLT3	MES/AC versus OPC/NPC	0.0595661	0.178358	-0.110417
ASH2L	MES/AC versus OPC/NPC	0.0613333	0.182606	-0.304003
CDK2	MES/AC versus OPC/NPC	0.062491	0.184775	0.218248
CEBPA	MES/AC versus OPC/NPC	0.0627671	0.184775	0.153094
SMAD5	MES/AC versus OPC/NPC	0.0658944	0.192898	-0.376212
PAK2	MES/AC versus OPC/NPC	0.0667945	0.194446	0.302722
AR	MES/AC versus OPC/NPC	0.0675899	0.195357	-0.0863737
RFXANK	MES/AC versus OPC/NPC	0.067853	0.195357	0.260944
GABARAP	MES/AC versus OPC/NPC	0.0686093	0.196455	-0.143144
IKBKB	MES/AC versus OPC/NPC	0.0698312	0.198051	0.202733
PAX3	MES/AC versus OPC/NPC	0.0699227	0.198051	-0.362439
KRAS	MES/AC versus OPC/NPC	0.0704503	0.198473	0.308841
PRKCZ	MES/AC versus OPC/NPC	0.0732999	0.204319	0.271813
STAT3	MES/AC versus OPC/NPC	0.0733054	0.204319	0.184438
SRF	MES/AC versus OPC/NPC	0.0746268	0.205582	-0.187611
PTK2	MES/AC versus OPC/NPC	0.0749061	0.205582	-0.139024
PLCG1	MES/AC versus OPC/NPC	0.0749355	0.205582	-0.134758
MAP3K11	MES/AC versus OPC/NPC	0.0759157	0.207032	0.177226
IRAK1	MES/AC versus OPC/NPC	0.0762541	0.207032	0.151607
CDK4	MES/AC versus OPC/NPC	0.0767167	0.207214	-0.197766
INSR	MES/AC versus OPC/NPC	0.0777075	0.208814	-0.12869
GNA13	MES/AC versus OPC/NPC	0.0782808	0.20884	-0.193244
PPP1CA	MES/AC versus OPC/NPC	0.0785141	0.20884	0.189956
SMARCD3	MES/AC versus OPC/NPC	0.0798001	0.210473	0.268245
TRAF6	MES/AC versus OPC/NPC	0.0799316	0.210473	-0.172148
BMI1	MES/AC versus OPC/NPC	0.0834401	0.218613	0.177009
NfKb.p65.p50	MES/AC versus OPC/NPC	0.0854228	0.221788	0.178267
LTBR	MES/AC versus OPC/NPC	0.0854986	0.221788	-0.131302
AXIN1	MES/AC versus OPC/NPC	0.0880548	0.227294	-0.145362
PPM1A	MES/AC versus OPC/NPC	0.088614	0.227616	0.255177
PRKCA	MES/AC versus OPC/NPC	0.0895119	0.228801	-0.160468
FGFR1	MES/AC versus OPC/NPC	0.0903814	0.229902	-0.123707
ZBTB16	MES/AC versus OPC/NPC	0.0915078	0.231643	0.257388
p38	MES/AC versus OPC/NPC	0.0920741	0.231956	0.293354
GNG12	MES/AC versus OPC/NPC	0.0936105	0.234698	0.146429
MYOD1	MES/AC versus OPC/NPC	0.0953349	0.237883	0.0957527
IL10RA	MES/AC versus OPC/NPC	0.0994234	0.246909	0.0918326
AURKB	MES/AC versus OPC/NPC	0.101119	0.249935	-0.223431
ITCH	MES/AC versus OPC/NPC	0.103452	0.254502	0.166218
AKT3	MES/AC versus OPC/NPC	0.109717	0.268652	0.261176
RPS6KA4	MES/AC versus OPC/NPC	0.114551	0.279184	0.213213
ELF1	MES/AC versus OPC/NPC	0.11801	0.286285	0.345824
NFE2L2	MES/AC versus OPC/NPC	0.121384	0.293112	-0.202455
ABL1	MES/AC versus OPC/NPC	0.123696	0.297324	0.167148
YY1	MES/AC versus OPC/NPC	0.124783	0.298567	-0.198575
MEF2D	MES/AC versus OPC/NPC	0.129834	0.309242	0.238593
MYBL2	MES/AC versus OPC/NPC	0.131621	0.310487	0.230997
MAPK8	MES/AC versus OPC/NPC	0.132469	0.310487	0.153424
USF1	MES/AC versus OPC/NPC	0.132589	0.310487	0.258434
MAPK13	MES/AC versus OPC/NPC	0.132727	0.310487	-0.246736
MEF2C	MES/AC versus OPC/NPC	0.135571	0.313765	0.233252
RXRA	MES/AC versus OPC/NPC	0.135906	0.313765	0.128947
TLR4	MES/AC versus OPC/NPC	0.135925	0.313765	-0.10948
ERBB2	MES/AC versus OPC/NPC	0.137378	0.315729	-0.0957594
PRKD1	MES/AC versus OPC/NPC	0.137997	0.315767	0.17024
SUZ12.EZH2	MES/AC versus OPC/NPC	0.140008	0.318976	0.256324
PSENEN	MES/AC versus OPC/NPC	0.142617	0.323511	-0.15165
AHR.ARNT	MES/AC versus OPC/NPC	0.146018	0.329799	0.261585
CDX2	MES/AC versus OPC/NPC	0.148038	0.332927	0.179689
ID2	MES/AC versus OPC/NPC	0.150233	0.335941	0.222012
MAP2K1	MES/AC versus OPC/NPC	0.151438	0.335941	-0.136802
ZFYVE9	MES/AC versus OPC/NPC	0.15157	0.335941	-0.16706
SMAD1	MES/AC versus OPC/NPC	0.151943	0.335941	-0.136673
RNF111	MES/AC versus OPC/NPC	0.154015	0.337469	-0.197077
NR1H4	MES/AC versus OPC/NPC	0.154252	0.337469	-0.235198
FBXW7	MES/AC versus OPC/NPC	0.154597	0.337469	-0.228477
X14.3.3	MES/AC versus OPC/NPC	0.156594	0.337469	-0.159525
NUMB	MES/AC versus OPC/NPC	0.156785	0.337469	0.189932
RORA	MES/AC versus OPC/NPC	0.157046	0.337469	0.15932
CSNK2A1	MES/AC versus OPC/NPC	0.157142	0.337469	0.165852
ELK1	MES/AC versus OPC/NPC	0.158181	0.338313	0.160382
MAP2K4	MES/AC versus OPC/NPC	0.15919	0.33864	0.118238
TNFRSF13C	MES/AC versus OPC/NPC	0.159998	0.33864	-0.105332
MAF	MES/AC versus OPC/NPC	0.160272	0.33864	0.158136
RIPK1	MES/AC versus OPC/NPC	0.162954	0.34158	-0.159549
FOS	MES/AC versus OPC/NPC	0.162967	0.34158	0.136005
CAMK1	MES/AC versus OPC/NPC	0.164218	0.341668	-0.188453
NEDD4L	MES/AC versus OPC/NPC	0.164314	0.341668	-0.196801
MAPK11	MES/AC versus OPC/NPC	0.168748	0.349501	-0.182436
MAPKAPK2	MES/AC versus OPC/NPC	0.172533	0.355619	0.159909
HRAS	MES/AC versus OPC/NPC	0.173059	0.355619	-0.126616
DVL2	MES/AC versus OPC/NPC	0.174694	0.357576	-0.175726
ROCK1	MES/AC versus OPC/NPC	0.176613	0.35837	-0.201146
NR5A1	MES/AC versus OPC/NPC	0.176975	0.35837	-0.110302
LRP5	MES/AC versus OPC/NPC	0.177133	0.35837	-0.105823
MEF2A	MES/AC versus OPC/NPC	0.181497	0.365362	-0.118542
KIT	MES/AC versus OPC/NPC	0.181993	0.365362	-0.0962046
PTPN11	MES/AC versus OPC/NPC	0.184065	0.365362	-0.0958491
NR2F2	MES/AC versus OPC/NPC	0.18462	0.365362	0.2178
SUZ12	MES/AC versus OPC/NPC	0.184957	0.365362	-0.325734
HMGA1	MES/AC versus OPC/NPC	0.185053	0.365362	-0.131621
SMAD3	MES/AC versus OPC/NPC	0.18547	0.365362	0.0866296
GNAQ	MES/AC versus OPC/NPC	0.18683	0.366193	-0.153599
RPL10	MES/AC versus OPC/NPC	0.188536	0.366193	-0.211986
TGFBR2	MES/AC versus OPC/NPC	0.189803	0.366193	-0.102234
DLK1	MES/AC versus OPC/NPC	0.190203	0.366193	-0.0896277
CRX	MES/AC versus OPC/NPC	0.191296	0.366193	0.157192
KAT2B	MES/AC versus OPC/NPC	0.191422	0.366193	-0.198441
BCL3	MES/AC versus OPC/NPC	0.192011	0.366193	0.207307
SRY	MES/AC versus OPC/NPC	0.19205	0.366193	0.241676
JNK	MES/AC versus OPC/NPC	0.192181	0.366193	0.194237
FLI1	MES/AC versus OPC/NPC	0.195051	0.369105	-0.167369
NFKB1	MES/AC versus OPC/NPC	0.195205	0.369105	0.104123
PRC2	MES/AC versus OPC/NPC	0.195823	0.369105	0.22066
AKT2	MES/AC versus OPC/NPC	0.203196	0.38163	0.169583
IL6ST	MES/AC versus OPC/NPC	0.20465	0.382988	-0.076147
KHSRP	MES/AC versus OPC/NPC	0.207587	0.387103	0.197709
HOXA9	MES/AC versus OPC/NPC	0.221883	0.411646	-0.193336
NR2C2	MES/AC versus OPC/NPC	0.22232	0.411646	0.196789
SFN	MES/AC versus OPC/NPC	0.224621	0.414442	0.153004
CDK3	MES/AC versus OPC/NPC	0.227045	0.417444	-0.153537
FOXO4	MES/AC versus OPC/NPC	0.230035	0.421462	0.0965333
PRKG1	MES/AC versus OPC/NPC	0.234693	0.427374	-0.185629
PRMT5	MES/AC versus OPC/NPC	0.234892	0.427374	0.136961
NFATC2	MES/AC versus OPC/NPC	0.237144	0.429978	0.10881
MAP2K2	MES/AC versus OPC/NPC	0.249664	0.451117	0.145218
IL4R	MES/AC versus OPC/NPC	0.251109	0.452169	-0.0701216
PTCRA	MES/AC versus OPC/NPC	0.253607	0.455102	-0.0844552
NKX3.1	MES/AC versus OPC/NPC	0.255596	0.457106	-0.162072
TEAD1	MES/AC versus OPC/NPC	0.258189	0.460174	-0.184308
FYN	MES/AC versus OPC/NPC	0.259464	0.460879	0.0961462
MYC	MES/AC versus OPC/NPC	0.263536	0.46653	-0.108774
WWTR1	MES/AC versus OPC/NPC	0.264611	0.466855	-0.147908
GLI2	MES/AC versus OPC/NPC	0.265941	0.467627	0.101738
MAPK15	MES/AC versus OPC/NPC	0.266953	0.467837	-0.166605
MAPK8IP1	MES/AC versus OPC/NPC	0.270105	0.470809	0.154191
SF1	MES/AC versus OPC/NPC	0.270897	0.470809	-0.229701
MET	MES/AC versus OPC/NPC	0.271344	0.470809	-0.0823839
SGK3	MES/AC versus OPC/NPC	0.274098	0.471413	0.158012
MXI1	MES/AC versus OPC/NPC	0.274944	0.471413	-0.193875
FOXO1	MES/AC versus OPC/NPC	0.275041	0.471413	0.0856761
CRTC3	MES/AC versus OPC/NPC	0.275291	0.471413	0.169213
EWSR1	MES/AC versus OPC/NPC	0.279233	0.476606	-0.0940003
TJP2	MES/AC versus OPC/NPC	0.283261	0.481912	-0.0861018
TRAF1	MES/AC versus OPC/NPC	0.284248	0.482026	-0.0813989
PRKCB	MES/AC versus OPC/NPC	0.288876	0.488293	0.153245
E4F1	MES/AC versus OPC/NPC	0.291547	0.491224	-0.225431
PIK3CA	MES/AC versus OPC/NPC	0.29333	0.492643	-0.100386
SETDB1.NLK.CHD7	MES/AC versus OPC/NPC	0.296101	0.494949	-0.224134
CDKN2A	MES/AC versus OPC/NPC	0.297541	0.494949	0.17135
YAP1	MES/AC versus OPC/NPC	0.298314	0.494949	-0.0993131
TCF3	MES/AC versus OPC/NPC	0.300128	0.494949	0.116496
RUNX1	MES/AC versus OPC/NPC	0.300344	0.494949	-0.117404
TCF7	MES/AC versus OPC/NPC	0.300597	0.494949	0.0971361
JAG2	MES/AC versus OPC/NPC	0.301736	0.494949	-0.0792799
CoREST.HDAC.complex	MES/AC versus OPC/NPC	0.302707	0.494949	-0.136175
MAPK7	MES/AC versus OPC/NPC	0.303204	0.494949	0.210885
MAZ	MES/AC versus OPC/NPC	0.30645	0.497327	0.151397
MTOR	MES/AC versus OPC/NPC	0.306559	0.497327	0.0929742
IRF3	MES/AC versus OPC/NPC	0.308582	0.499065	0.13531
DLL3	MES/AC versus OPC/NPC	0.312916	0.504516	-0.0651813
PRDM1	MES/AC versus OPC/NPC	0.313882	0.504522	0.161366
PTPN6	MES/AC versus OPC/NPC	0.315364	0.505353	-0.113218
MAP3K7	MES/AC versus OPC/NPC	0.324495	0.5184	0.0939293
CAMKK2	MES/AC versus OPC/NPC	0.32613	0.519429	0.0846794
NLK	MES/AC versus OPC/NPC	0.33132	0.526095	-0.147313
MAPK14	MES/AC versus OPC/NPC	0.333074	0.527284	0.0853262
ID3	MES/AC versus OPC/NPC	0.338479	0.534227	0.154668
AMPK	MES/AC versus OPC/NPC	0.341306	0.536631	-0.129092
PLK1	MES/AC versus OPC/NPC	0.342051	0.536631	0.146288
JAG1	MES/AC versus OPC/NPC	0.3435	0.537295	-0.06643
ATR	MES/AC versus OPC/NPC	0.347785	0.542378	0.163519
CREB1	MES/AC versus OPC/NPC	0.348834	0.5424	0.106473
SYK	MES/AC versus OPC/NPC	0.351629	0.545014	-0.118612
SIK1	MES/AC versus OPC/NPC	0.352595	0.545014	0.126434
KDM1A	MES/AC versus OPC/NPC	0.355535	0.547897	-0.137376
PKN1	MES/AC versus OPC/NPC	0.356552	0.547897	0.138772
HSF1	MES/AC versus OPC/NPC	0.360715	0.552674	0.0729433
JAK1	MES/AC versus OPC/NPC	0.364946	0.557527	-0.0681891
HDAC5	MES/AC versus OPC/NPC	0.367163	0.559284	-0.0894342
PAX6	MES/AC versus OPC/NPC	0.371683	0.564528	0.0956343
HES1	MES/AC versus OPC/NPC	0.376343	0.569953	-0.132618
CDKN1A	MES/AC versus OPC/NPC	0.382502	0.577611	0.0699598
KIF7	MES/AC versus OPC/NPC	0.387288	0.58241	-0.0935403
PTPRC	MES/AC versus OPC/NPC	0.387903	0.58241	-0.057711
g.secretase	MES/AC versus OPC/NPC	0.394592	0.59076	-0.058465
ROBO1	MES/AC versus OPC/NPC	0.399671	0.59666	0.127556
SGK1	MES/AC versus OPC/NPC	0.404903	0.602754	-0.101163
MYOG	MES/AC versus OPC/NPC	0.409074	0.607238	-0.12069
FOSL1	MES/AC versus OPC/NPC	0.414434	0.613457	0.169141
BCR.ABL.fusion	MES/AC versus OPC/NPC	0.420623	0.619974	-0.120816
MYD88	MES/AC versus OPC/NPC	0.422114	0.619974	-0.0623221
ELF3	MES/AC versus OPC/NPC	0.423068	0.619974	-0.121674
DLL4	MES/AC versus OPC/NPC	0.42357	0.619974	0.0522996
TFAP2A	MES/AC versus OPC/NPC	0.426022	0.621826	0.101615
MAFA	MES/AC versus OPC/NPC	0.42913	0.624623	0.0974277
RASA1	MES/AC versus OPC/NPC	0.431059	0.625428	-0.0898467
PTPRR	MES/AC versus OPC/NPC	0.432071	0.625428	0.14123
LRP6	MES/AC versus OPC/NPC	0.440912	0.635703	-0.0546866
STK4	MES/AC versus OPC/NPC	0.441595	0.635703	0.068155
WT1	MES/AC versus OPC/NPC	0.447897	0.643008	0.128468
CREBBP	MES/AC versus OPC/NPC	0.450148	0.644474	-0.0633798
PTPN2	MES/AC versus OPC/NPC	0.453025	0.646216	-0.107789
SETDB1	MES/AC versus OPC/NPC	0.454895	0.646216	-0.172227
SMAD4	MES/AC versus OPC/NPC	0.455684	0.646216	-0.060433
PP2B	MES/AC versus OPC/NPC	0.45767	0.646216	-0.0671416
JUND	MES/AC versus OPC/NPC	0.458337	0.646216	0.0814116
NR1H3	MES/AC versus OPC/NPC	0.45948	0.646216	0.114896
NOTCH1	MES/AC versus OPC/NPC	0.460193	0.646216	0.0543122
CSNK2B	MES/AC versus OPC/NPC	0.46369	0.646216	0.138707
DDX5	MES/AC versus OPC/NPC	0.464834	0.646216	0.116943
DYRK1B	MES/AC versus OPC/NPC	0.466869	0.646216	-0.130052
RFXAP	MES/AC versus OPC/NPC	0.467727	0.646216	0.102952
SGK2	MES/AC versus OPC/NPC	0.467924	0.646216	0.102435
STAT5B	MES/AC versus OPC/NPC	0.468171	0.646216	-0.0546902
PAK1	MES/AC versus OPC/NPC	0.46863	0.646216	0.073561
E2F3	MES/AC versus OPC/NPC	0.475059	0.653362	-0.10044
SIRT2	MES/AC versus OPC/NPC	0.48132	0.660239	-0.115437
SMC3	MES/AC versus OPC/NPC	0.485001	0.663552	0.0896391
CHEK2	MES/AC versus OPC/NPC	0.488425	0.666497	0.101715
ERCC6	MES/AC versus OPC/NPC	0.491128	0.668445	0.101451
MYOD.HEB	MES/AC versus OPC/NPC	0.493211	0.669541	-0.0692404
PRKACA	MES/AC versus OPC/NPC	0.494512	0.669571	0.0901227
VDR	MES/AC versus OPC/NPC	0.502715	0.678925	0.102115
HDAC6	MES/AC versus OPC/NPC	0.505196	0.680521	-0.0652397
TRAF3	MES/AC versus OPC/NPC	0.517756	0.695651	-0.0677315
BORA	MES/AC versus OPC/NPC	0.520366	0.69737	0.0662365
SDC4	MES/AC versus OPC/NPC	0.525696	0.702716	-0.0924495
PPARGC1A	MES/AC versus OPC/NPC	0.533816	0.710818	0.0526283
BTK	MES/AC versus OPC/NPC	0.53447	0.710818	-0.0651861
RCOR1	MES/AC versus OPC/NPC	0.538568	0.714153	-0.0916231
SMAD3.SMAD4	MES/AC versus OPC/NPC	0.539703	0.714153	-0.0622998
ATM	MES/AC versus OPC/NPC	0.541353	0.714532	0.0862997
STAT1	MES/AC versus OPC/NPC	0.548739	0.722284	-0.0398664
PRKCD	MES/AC versus OPC/NPC	0.551145	0.722284	-0.0643931
PML	MES/AC versus OPC/NPC	0.552725	0.722284	-0.0575262
FGFR4	MES/AC versus OPC/NPC	0.554266	0.722284	0.0397377
SPAG9	MES/AC versus OPC/NPC	0.555409	0.722284	0.0587634
VAV1	MES/AC versus OPC/NPC	0.556112	0.722284	-0.0691097
INCENP	MES/AC versus OPC/NPC	0.559942	0.722284	-0.0963934
IFNGR2.INFGR1	MES/AC versus OPC/NPC	0.56065	0.722284	-0.0332695
CDC25A	MES/AC versus OPC/NPC	0.56102	0.722284	-0.0952938
NOS1	MES/AC versus OPC/NPC	0.561189	0.722284	0.0970425
REST	MES/AC versus OPC/NPC	0.565707	0.722284	0.090614
BCAR1	MES/AC versus OPC/NPC	0.565959	0.722284	-0.0489305
FOXO3	MES/AC versus OPC/NPC	0.56756	0.722284	-0.042887
PIN1	MES/AC versus OPC/NPC	0.567713	0.722284	0.0684166
YWHAB	MES/AC versus OPC/NPC	0.568834	0.722284	0.0570169
HAND1	MES/AC versus OPC/NPC	0.570275	0.722284	0.06943
APEX1	MES/AC versus OPC/NPC	0.571794	0.722284	0.0739906
TCF7L2	MES/AC versus OPC/NPC	0.573229	0.722284	0.0726995
DDB2	MES/AC versus OPC/NPC	0.573416	0.722284	0.0908596
PPARG	MES/AC versus OPC/NPC	0.575139	0.722716	-0.0441586
SMARCA4	MES/AC versus OPC/NPC	0.578799	0.725576	-0.0561036
CXCL1	MES/AC versus OPC/NPC	0.580251	0.72566	0.0613428
PDPK1	MES/AC versus OPC/NPC	0.584345	0.72904	0.0466607
CSNK1D	MES/AC versus OPC/NPC	0.58788	0.731052	-0.0655174
CUX1	MES/AC versus OPC/NPC	0.588748	0.731052	-0.10854
PPP1R15A	MES/AC versus OPC/NPC	0.590187	0.731107	0.0897026
SPEN	MES/AC versus OPC/NPC	0.59245	0.732178	-0.0905197
HNF4A	MES/AC versus OPC/NPC	0.600098	0.7382	0.089315
CIITA	MES/AC versus OPC/NPC	0.60014	0.7382	0.0469306
SNAI1	MES/AC versus OPC/NPC	0.604477	0.741794	0.0416992
IKBKG	MES/AC versus OPC/NPC	0.614625	0.752485	-0.06146
MAX	MES/AC versus OPC/NPC	0.622777	0.760688	-0.0661614
CYLD	MES/AC versus OPC/NPC	0.628909	0.766391	-0.0615243
NOTCH3	MES/AC versus OPC/NPC	0.63781	0.775187	-0.0367694
LATS2	MES/AC versus OPC/NPC	0.639085	0.775187	-0.0534383
SREBF1	MES/AC versus OPC/NPC	0.64159	0.776427	-0.039602
PPP3CA	MES/AC versus OPC/NPC	0.643735	0.777228	-0.0481025
KMT2A	MES/AC versus OPC/NPC	0.64646	0.778724	0.101168
HSP90AA1	MES/AC versus OPC/NPC	0.649421	0.780496	-0.0840026
GSK3B.Axin.APC	MES/AC versus OPC/NPC	0.656237	0.786884	-0.040356
ESR1	MES/AC versus OPC/NPC	0.66639	0.797234	0.0144593
E2F1	MES/AC versus OPC/NPC	0.671763	0.800547	-0.0512607
LAT	MES/AC versus OPC/NPC	0.672619	0.800547	-0.0347552
RPS6KB1	MES/AC versus OPC/NPC	0.673986	0.800547	-0.0360272
MAP3K5	MES/AC versus OPC/NPC	0.675271	0.800547	0.0336218
TEAD4	MES/AC versus OPC/NPC	0.677739	0.801659	-0.067147
STAT4	MES/AC versus OPC/NPC	0.683065	0.805481	-0.0380591
CDK1	MES/AC versus OPC/NPC	0.684424	0.805481	0.0465021
ARNT	MES/AC versus OPC/NPC	0.685581	0.805481	0.0644435
TYK2	MES/AC versus OPC/NPC	0.692437	0.811716	-0.0331252
LYN	MES/AC versus OPC/NPC	0.694637	0.812478	0.043609
KLF1	MES/AC versus OPC/NPC	0.703675	0.821216	0.0577495
RFX.complex	MES/AC versus OPC/NPC	0.711182	0.828132	0.0546486
TFDP1	MES/AC versus OPC/NPC	0.714372	0.830002	-0.056569
HDAC2	MES/AC versus OPC/NPC	0.716848	0.831036	-0.0425558
YWHAZ	MES/AC versus OPC/NPC	0.718801	0.831461	0.0282565
RXRB	MES/AC versus OPC/NPC	0.722055	0.833259	-0.0564042
PTPN1	MES/AC versus OPC/NPC	0.723536	0.833259	-0.0327012
NCOR2	MES/AC versus OPC/NPC	0.734928	0.844523	-0.041469
PPARD	MES/AC versus OPC/NPC	0.736972	0.845018	-0.0436888
TCF4	MES/AC versus OPC/NPC	0.742138	0.848947	-0.0312216
PPP3CC	MES/AC versus OPC/NPC	0.743639	0.848947	-0.0333651
RARB	MES/AC versus OPC/NPC	0.749778	0.85355	0.0419284
DNMT1	MES/AC versus OPC/NPC	0.750929	0.85355	0.0264975
RARG	MES/AC versus OPC/NPC	0.769949	0.873276	0.0375658
SMAD2	MES/AC versus OPC/NPC	0.771772	0.873452	-0.0234673
MEK1.2	MES/AC versus OPC/NPC	0.778235	0.878869	-0.0275606
CASP8	MES/AC versus OPC/NPC	0.787075	0.886941	-0.0201185
PRKAA2	MES/AC versus OPC/NPC	0.790736	0.889154	-0.0445541
ROBO	MES/AC versus OPC/NPC	0.80038	0.898071	-0.0511025
ZNF217	MES/AC versus OPC/NPC	0.805809	0.901747	0.0369833
LCK	MES/AC versus OPC/NPC	0.807098	0.901747	-0.0222336
NOTCH2	MES/AC versus OPC/NPC	0.809586	0.902602	-0.020665
CDON	MES/AC versus OPC/NPC	0.821693	0.912968	0.0144451
ESR2	MES/AC versus OPC/NPC	0.822368	0.912968	0.0185735
KLF5	MES/AC versus OPC/NPC	0.824885	0.913588	0.0219456
LATS1	MES/AC versus OPC/NPC	0.826414	0.913588	-0.0300754
STAT6	MES/AC versus OPC/NPC	0.843836	0.929561	0.0151993
NR4A1	MES/AC versus OPC/NPC	0.84441	0.929561	0.015654
PPP1CC	MES/AC versus OPC/NPC	0.846205	0.929584	0.0445259
NCK1	MES/AC versus OPC/NPC	0.850831	0.932711	0.0211492
JAK3	MES/AC versus OPC/NPC	0.863591	0.944722	-0.0188668
EGFR	MES/AC versus OPC/NPC	0.869766	0.94734	-0.0103659
HTT	MES/AC versus OPC/NPC	0.871891	0.94734	-0.0139085
EGR1	MES/AC versus OPC/NPC	0.873174	0.94734	0.0236306
BRCA1	MES/AC versus OPC/NPC	0.874117	0.94734	-0.013498
IKZF1	MES/AC versus OPC/NPC	0.875024	0.94734	0.0179335
MAP3K10	MES/AC versus OPC/NPC	0.880485	0.951287	0.0223513
GLI1	MES/AC versus OPC/NPC	0.885608	0.954853	0.0139883
PRKDC	MES/AC versus OPC/NPC	0.889547	0.95626	-0.03122
RUNX3	MES/AC versus OPC/NPC	0.891208	0.95626	-0.0195058
ATF4	MES/AC versus OPC/NPC	0.892388	0.95626	0.0180312
TFEB	MES/AC versus OPC/NPC	0.898776	0.958627	-0.0126337
MAP2K6	MES/AC versus OPC/NPC	0.899398	0.958627	-0.01296
FOXP3	MES/AC versus OPC/NPC	0.900411	0.958627	-0.0168865
PPP2CB	MES/AC versus OPC/NPC	0.902707	0.958627	-0.0219547
CDK6	MES/AC versus OPC/NPC	0.903743	0.958627	-0.0158666
RANBP9	MES/AC versus OPC/NPC	0.905977	0.959054	-0.0123986
MYCN	MES/AC versus OPC/NPC	0.909531	0.960876	0.0171708
NR2F1	MES/AC versus OPC/NPC	0.91401	0.963665	0.018266
PSEN1	MES/AC versus OPC/NPC	0.925075	0.972778	-0.0054783
RFX5	MES/AC versus OPC/NPC	0.926672	0.972778	-0.012416
PRKCQ	MES/AC versus OPC/NPC	0.928381	0.972778	0.00838856
TAL1	MES/AC versus OPC/NPC	0.93008	0.972778	-0.0097031
GTF2I	MES/AC versus OPC/NPC	0.936132	0.974502	0.00673676
HMGA2	MES/AC versus OPC/NPC	0.936752	0.974502	0.0132902
CHD7	MES/AC versus OPC/NPC	0.937426	0.974502	-0.0177705
CLOCK	MES/AC versus OPC/NPC	0.939167	0.974502	-0.0118612
IKK.complex	MES/AC versus OPC/NPC	0.941311	0.974797	0.00588719
HNF1A	MES/AC versus OPC/NPC	0.945957	0.977675	-0.0125996
Myog.SWI.SNF.complex	MES/AC versus OPC/NPC	0.95224	0.980702	-0.011755
SOX9	MES/AC versus OPC/NPC	0.955309	0.980702	-0.00843793
AURKA	MES/AC versus OPC/NPC	0.95625	0.980702	0.00587664
SUFU	MES/AC versus OPC/NPC	0.956372	0.980702	0.00564752
KAT5	MES/AC versus OPC/NPC	0.959338	0.981168	-0.00872692
EED	MES/AC versus OPC/NPC	0.964341	0.981168	-0.00933137
MYOD1.SWI.SNF.complex	MES/AC versus OPC/NPC	0.965213	0.981168	-0.00445396
IRF7	MES/AC versus OPC/NPC	0.96612	0.981168	0.00612949
CBX3	MES/AC versus OPC/NPC	0.966189	0.981168	-0.00736162
SMO	MES/AC versus OPC/NPC	0.9735	0.984051	0.0022766
ATF1	MES/AC versus OPC/NPC	0.973654	0.984051	-0.00317448
PDX1	MES/AC versus OPC/NPC	0.974661	0.984051	0.00756156
MAP2K3	MES/AC versus OPC/NPC	0.977122	0.984639	0.00290625
PDGFRA	MES/AC versus OPC/NPC	0.97996	0.985545	-0.00181077
NPM1	MES/AC versus OPC/NPC	0.981783	0.985545	0.00298388
MAP3K1	MES/AC versus OPC/NPC	0.985544	0.987428	-0.00175547
SET	MES/AC versus OPC/NPC	0.996826	0.996826	-0.000593695
